# Supplementary material for: Asymmetric Amination of Unstrained C(sp3)–C(sp3) Bonds
Source: PubMed Central journal article supplement — J Am Chem Soc. 2024 Oct 16;146(43):29857–64. doi: 10.1021/jacs.4c11802 (PMC11669385; doi:10.1021/jacs.4c11802), 2024-10-16
Supplement: ja4c11802_si_001.pdf [file ja4c11802_si_001.pdf]

## Supporting Information for

# Asymmetric amination of unstrained C(sp<sup>3</sup>)-C(sp<sup>3</sup>) bonds

Yang Liu<sup>1</sup>, Ye-Wei Chen<sup>1,2</sup>, Yuan-Xiang Yang<sup>1</sup>, John F. Hartwig<sup>2\*</sup>, and Zhi-Tao He<sup>1,3,4\*</sup>

<sup>1</sup>State Key Laboratory of Organometallic Chemistry, Shanghai Institute of Organic Chemistry, University of Chinese Academy of Sciences, Shanghai, 200032, China.

<sup>2</sup>Department of Chemistry, University of California, Berkeley; California 94720, United States.

<sup>3</sup>School of Chemistry and Materials Science, Hangzhou Institute for Advanced Study, University of Chinese Academy of Sciences, Hangzhou 310024, China.

<sup>4</sup>Ningbo Zhongke Creation Center of New Materials, Ningbo, 315899, China.

\*Correspondence to: jhartwig@berkeley.edu (J.F.H.); hezt@sioc.ac.cn (Z.T.H.)

## Table of Contents

|                                                                                                                 |     |
|-----------------------------------------------------------------------------------------------------------------|-----|
| 1. General information .....                                                                                    | S2  |
| 2. Synthesis of substrates and racemic products.....                                                            | S2  |
| 3. Development of reaction conditions.....                                                                      | S4  |
| 4. General procedure for the asymmetric C-C $\sigma$ bond aminations.....                                       | S6  |
| 5. Applications of C-C bond aminations.....                                                                     | S20 |
| 6. Mechanistic studies.....                                                                                     | S22 |
| 7. Copies of <sup>1</sup> H NMR, <sup>13</sup> C NMR, <sup>19</sup> F NMR, and <sup>31</sup> P NMR spectra..... | S43 |
| 8. References.....                                                                                              | S71 |

## 1. General information

All air-sensitive manipulations were conducted with Schlenk techniques under argon. Unless otherwise indicated, all commercially available starting materials and dry solvents were purchased and used directly without further purification.  $^1\text{H}$ ,  $^{13}\text{C}$  and  $^{19}\text{F}$  NMR spectra were acquired on 400 MHz Bruker or 500 MHz Agilent instruments at Shanghai Institute of Organic Chemistry. For high-resolution mass spectra: ESI mass spectra were recorded on Thermo Scientific Q Exactive HF Orbitrap-FTMS; MALDI was measured on Voyager-DE STR; EI mass spectra were recorded on Waters Premier GC-TOF MS; FI mass spectra were recorded on JEOL-AccuTOF-GCv4G-GCT MS. Optical rotation was measured using a 1 mL cell with 1.0 dm path length on a JASCO P-1030 polarimeter. HPLC analysis was conducted on a Shimadzu HPLC system equipped with Daicel or Chiralpak chiral-stationary-phase columns ( $\phi$  4.6 mm  $\times$  250 mm). Chemical shifts are reported in  $\delta$  (ppm) referenced to an internal TMS standard or  $\text{CHCl}_3$  in  $\text{CDCl}_3$  (7.26 ppm) for  $^1\text{H}$  NMR,  $\text{CDCl}_3$  ( $\delta$  = 77.10 ppm) for  $^{13}\text{C}$  NMR, and  $\text{CFCl}_3$  (0 ppm) for  $^{19}\text{F}$  NMR. Coupling constants ( $J$ ) are reported in Hz. Multiplicities are reported using the following abbreviations: br = broad, s = singlet, d = doublet, t = triplet, q = quartet, m = multiplet. Column chromatography was performed with 300-400 mesh silica gel using standard techniques for flash column chromatography.

## 2. Synthesis of substrates and racemic products

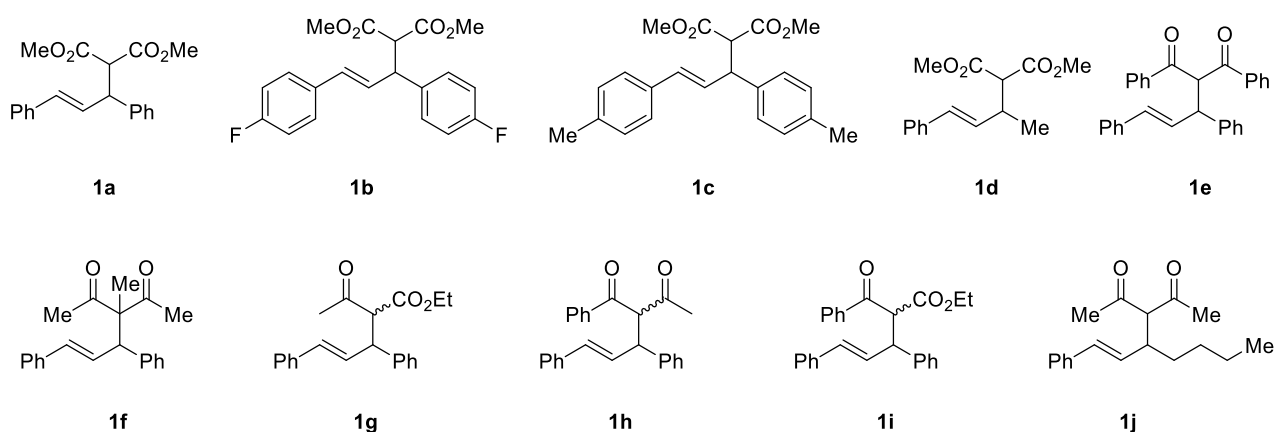

All these substrates are reported and prepared according to the literatures<sup>[1-7]</sup>.

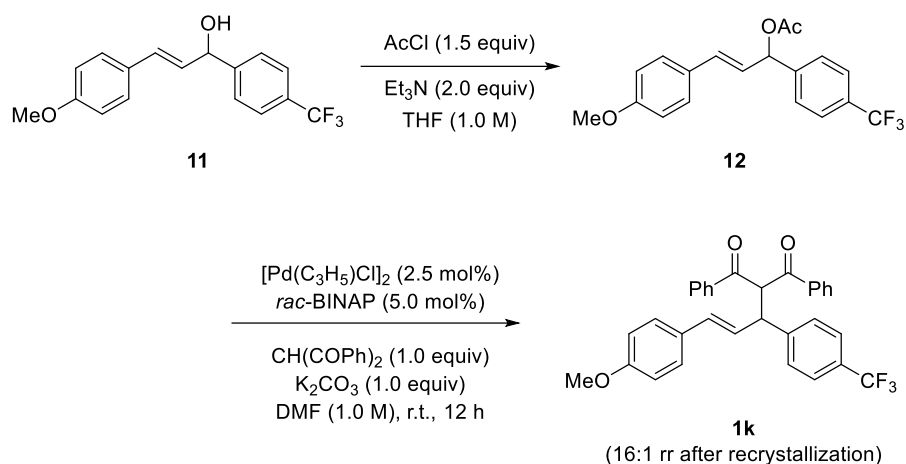

**(E)-2-(3-(4-Methoxyphenyl)-1-(4-(trifluoromethyl)phenyl)allyl)-1,3-diphenylpropane-1,3-dione (1k).** In a nitrogen-filled glovebox, to a 50 mL flask with alcohol **11** (3.1 g, 10 mmol) and Et<sub>3</sub>N (2.0 g, 20 mmol) were added AcCl (1.2 g, 15 mmol) and dry THF (10 mL). Then the reaction was stirred at room temperature for 12 h. After this time, the reaction was washed by brine and extracted with ethyl acetate, dried over Na<sub>2</sub>SO<sub>4</sub>, concentrated and purified by flash column chromatography to provide **12** as a light-yellow oil in 80% yield (2.8 g). Then in a nitrogen-filled glovebox, to a 25 mL flask with [Pd(allyl)Cl]<sub>2</sub> (73 mg, 0.20 mmol) and *rac*-BINAP (0.25 g, 0.40 mmol) were added CH(COPh)<sub>2</sub> (1.8 g, 8.0 mmol), K<sub>2</sub>CO<sub>3</sub> (1.1 g, 8.0 mmol), the prepared **12** (8.0 mmol) and dry DMF (8.0 mL). Then the mixture was stirred at room temperature for 12 h. After this time, the reaction was washed with brine and extracted by ethyl acetate, dried over Na<sub>2</sub>SO<sub>4</sub>, concentrated and purified by flash column chromatography to afford **1k** with 2:1 regioselectivity. The corresponding regioselectivity was elevated to 16:1 after repeated recrystallization with toluene and hexane. In this case, **1k** was obtained in 19% yield (0.79 g) as a white solid. <sup>1</sup>H NMR (500 MHz, chloroform-*d*) δ 8.06 – 7.94 (m, 2H), 7.89 – 7.76 (m, 2H), 7.61 – 7.53 (m, 1H), 7.50 – 7.40 (m, 5H), 7.35 (t, *J* = 7.8 Hz, 2H), 7.26 – 7.22 (m, 2H), 7.16 (d, *J* = 8.1 Hz, 2H), 6.87 – 6.71 (m, 2H), 6.40 (dd, *J* = 15.8, 7.9 Hz, 1H), 6.33 (d, *J* = 15.8 Hz, 1H), 5.91 (d, *J* = 10.4 Hz, 1H), 4.77 (dd, *J* = 10.4, 7.8 Hz, 1H), 3.72 (s, 3H). <sup>13</sup>C NMR (126 MHz, chloroform-*d*) δ 194.5, 193.7, 158.5, 140.4, 137.2, 136.8, 133.7, 133.4, 133.1, 132.4, 130.3, 129.4, 129.0, 128.8, 128.7, 128.8 (q, *J* = 32.3 Hz), 128.6, 126.4, 125.3 (q, *J* = 4.0 Hz), 124.2 (q, *J* = 272.3 Hz), 114.2, 62.6, 55.2, 49.2. <sup>19</sup>F NMR (376 MHz, chloroform-*d*) δ -62.54. HRMS (EI): [M]<sup>⊕</sup> calcd for C<sub>32</sub>H<sub>25</sub>F<sub>3</sub>O<sub>3</sub>Na<sup>⊕</sup> 537.1648, found 537.1653.

### 3. Development of reaction conditions

#### 3.1 The evaluations of chiral ligands

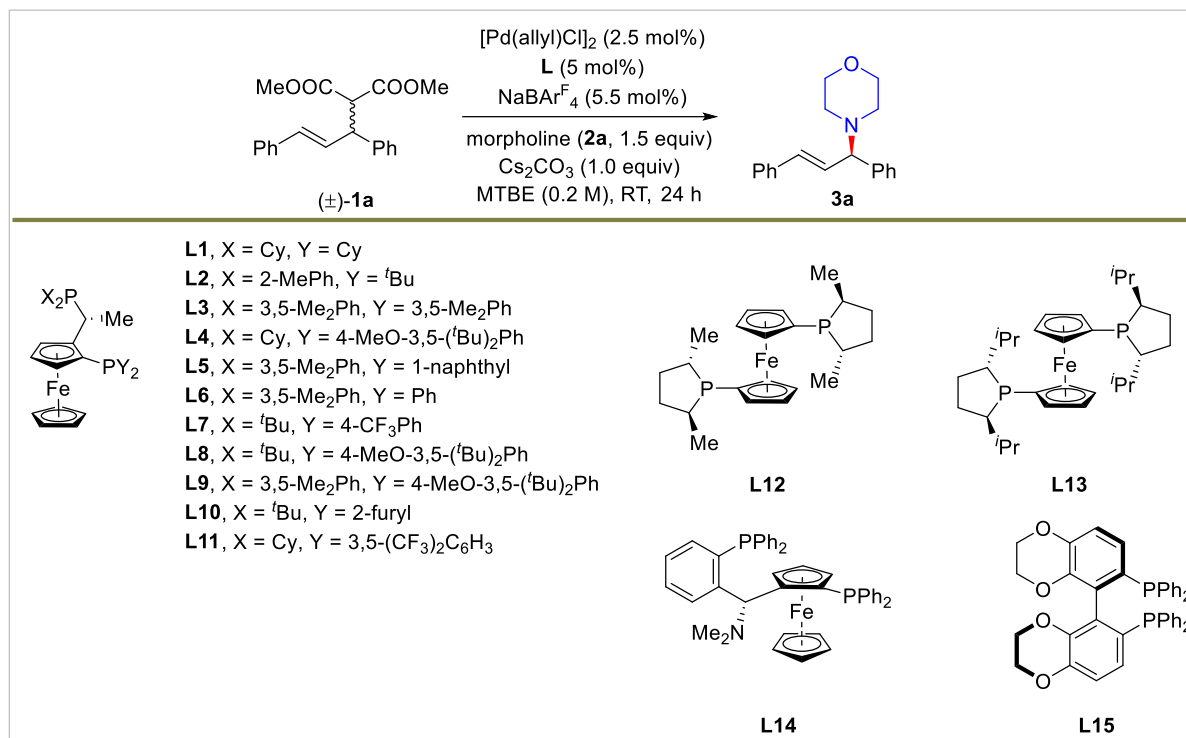

| Entry | L          | Yield (%) <sup>a</sup> | er (%) <sup>b</sup> |
|-------|------------|------------------------|---------------------|
| 1     | <b>L1</b>  | 37                     | 50:50               |
| 2     | <b>L2</b>  | 4                      | 55:45               |
| 3     | <b>L3</b>  | 10                     | 30:70               |
| 4     | <b>L4</b>  | 32                     | 75:25               |
| 5     | <b>L5</b>  | 34                     | 19:81               |
| 6     | <b>L6</b>  | 30                     | 72:28               |
| 7     | <b>L7</b>  | 41                     | 69:31               |
| 8     | <b>L8</b>  | 76                     | 40:60               |
| 9     | <b>L9</b>  | 12                     | 75:25               |
| 10    | <b>L10</b> | 72                     | 58:42               |
| 11    | <b>L11</b> | 10                     | 94:6                |
| 12    | <b>L12</b> | 64                     | 24:76               |

|    |            |    |       |
|----|------------|----|-------|
| 13 | <b>L13</b> | 10 | 26:74 |
| 14 | <b>L14</b> | 9  | 55:45 |
| 15 | <b>L15</b> | 77 | 58:42 |

<sup>a</sup>Determined by crude <sup>1</sup>H NMR. <sup>b</sup>Determined by HPLC analysis.

### 3.2 The evaluations of other conditions

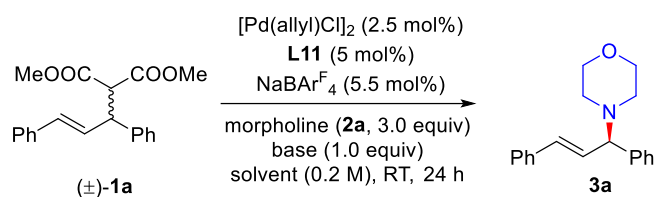

| Entry             | Base                            | Solvent     | Yield (%) <sup>a</sup> | er (%) <sup>b</sup> |
|-------------------|---------------------------------|-------------|------------------------|---------------------|
| 1                 | Cs <sub>2</sub> CO <sub>3</sub> | MTBE        | 22                     | 95:5                |
| 2                 | Cs <sub>2</sub> CO <sub>3</sub> | mesitylene  | 61                     | 90:10               |
| 3                 | Cs <sub>2</sub> CO <sub>3</sub> | cyclohexane | 69                     | 82:18               |
| 4                 | Cs <sub>2</sub> CO <sub>3</sub> | PhOMe       | 59                     | 80:20               |
| 5                 | Cs <sub>2</sub> CO <sub>3</sub> | DME         | n.d.                   |                     |
| 6                 | Cs <sub>2</sub> CO <sub>3</sub> | DCE         | 38                     | 62:38               |
| 7                 | Cs <sub>2</sub> CO <sub>3</sub> | MeOH        | 18                     | 53:47               |
| 8 <sup>c</sup>    | Cs <sub>2</sub> CO <sub>3</sub> | PhEt        | 56                     | 91:9                |
| 9 <sup>c</sup>    | Na <sub>2</sub> CO <sub>3</sub> | PhEt        | 26                     | 50:50               |
| 10 <sup>c</sup>   | K <sub>2</sub> CO <sub>3</sub>  | PhEt        | 28                     | 50:50               |
| 11 <sup>c</sup>   | Et <sub>3</sub> N               | PhEt        | 28                     | 50:50               |
| 12 <sup>c</sup>   | NaO <sup>t</sup> Bu             | PhEt        | 76                     | 50:50               |
| 13 <sup>c</sup>   | LiO <sup>t</sup> Bu             | PhEt        | 76                     | 50:50               |
| 14 <sup>c</sup>   | KHMDS                           | PhEt        | 95                     | 57:43               |
| 15 <sup>c,d</sup> | KO <sup>t</sup> Bu              | PhEt        | 86                     | 95:5                |

<sup>a</sup>Determined by crude <sup>1</sup>H NMR. <sup>b</sup>Determined by HPLC analysis. <sup>c</sup>The reaction concentration was 0.5 M. <sup>d</sup>Isolated yield. n.d., not detected.

#### 4. General procedure for the asymmetric C-C $\sigma$ bond aminations

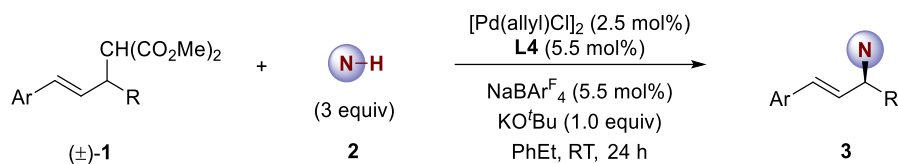

General procedure: in a nitrogen-filled glovebox, to a 4 mL vial with  $[\text{Pd}(\text{allyl})\text{Cl}]_2$  (0.9 mg, 0.0025 mmol), **L11** (4.8 mg, 0.0055 mmol) and sodium tetrakis[3,5-bis(trifluoromethyl)phenyl]borate ( $\text{NaBARF}_4$ , 4.9 mg, 0.0055 mmol) were added alkene **1** (0.10 mmol),  $\text{KO}^t\text{Bu}$  (11 mg, 0.10 mmol) and dry PhEt (0.20 mL) sequentially. Then the reaction was stirred at room temperature for 1 min. Next, amine nucleophile **2** (0.30 mmol) was added to the reaction and the resulting mixture was stirred at room temperature for 24 h. After this time, the reaction was concentrated and purified by flash column chromatography to afford the pure product **3**.

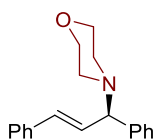

#### (*R,E*)-4-(1,3-Diphenylallyl)morpholine (**3a**)

Known compound<sup>[81]</sup>. Yellow oil, 86% yield,  $[\alpha]_D^{25}$  -3.3 (*c* 0.46,  $\text{CHCl}_3$ ) for 95:5 er;  $^1\text{H}$  NMR (400 MHz, chloroform-*d*)  $\delta$  7.51 – 7.37 (m, 2H), 7.37 – 7.16 (m, 8H), 6.56 (d, *J* = 15.8 Hz, 1H), 6.28 (dd, *J* = 15.8, 8.9 Hz, 1H), 3.79 (d, *J* = 8.9 Hz, 1H), 3.70 (t, *J* = 4.8 Hz, 4H), 2.54 (d, *J* = 11.8 Hz, 2H), 2.39 (dt, *J* = 11.8, 4.8 Hz, 2H).  $^{13}\text{C}$  NMR (126 MHz, chloroform-*d*)  $\delta$  141.6, 136.8, 131.6, 131.5, 128.8, 128.6, 128.1, 127.6, 127.4, 126.5, 74.9, 67.2, 52.3. HRMS (ESI):  $[\text{M}+\text{H}]^{\oplus}$  calcd for  $\text{C}_{19}\text{H}_{22}\text{ON}$   $^{\oplus}$  280.1696, found 280.1696. HPLC analysis: chiral OJ-H column; detected at 254 nm, 40 °C; 10% *i*PrOH in *n*-hexane; flow = 1.0 mL/min; Retention time: 7.3 min (minor), 9.1 min (major).

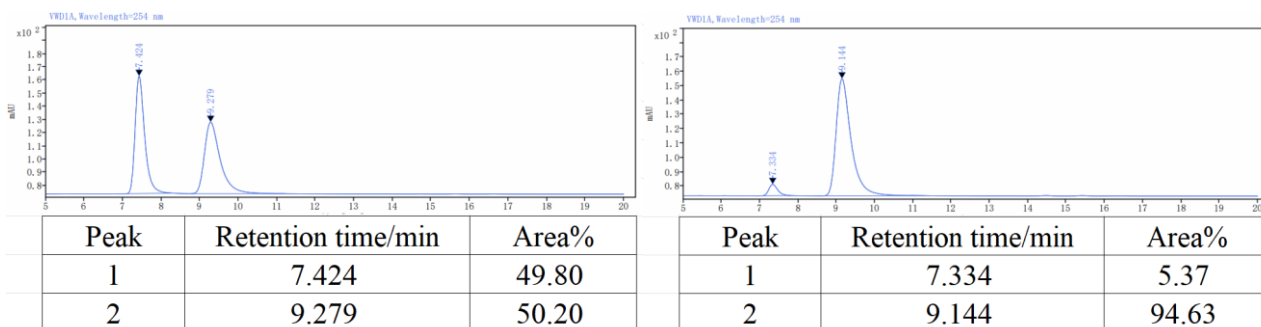

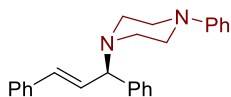

### (*R,E*)-1-(1,3-Diphenylallyl)-4-phenylpiperazine (**3b**)

[Pd(allyl)Cl]<sub>2</sub> (4 mol%), **L11** (8.8 mol%), NaBAR<sup>F</sup><sub>4</sub> (8.8 mol%) and **2b** (5 equiv) were used. Yellow oil, 52% yield,  $[\alpha]_D^{25}$  -19.5 (*c* 0.65, CHCl<sub>3</sub>) for 95:5 er; <sup>1</sup>H NMR (400 MHz, chloroform-*d*)  $\delta$  7.43 (d, *J* = 7.0 Hz, 2H), 7.39 – 7.18 (m, 10H), 6.95 – 6.88 (m, 2H), 6.84 (td, *J* = 7.2, 1.0 Hz, 1H), 6.59 (d, *J* = 15.8 Hz, 1H), 6.34 (dd, *J* = 15.8, 8.8 Hz, 1H), 3.86 (d, *J* = 8.8 Hz, 1H), 3.19 (t, *J* = 5.1 Hz, 4H), 2.72 (dt, *J* = 10.7, 5.0 Hz, 2H), 2.57 (dt, *J* = 11.0, 5.0 Hz, 2H). <sup>13</sup>C NMR (126 MHz, chloroform-*d*)  $\delta$  151.4, 141.9, 136.9, 131.7, 131.5, 129.2, 128.8, 128.6, 128.1, 127.6, 127.4, 126.5, 119.6, 116.0, 74.4, 51.6, 49.3. HRMS (ESI): [M+H]<sup>+</sup> calcd for C<sub>25</sub>H<sub>27</sub>N<sub>2</sub><sup>+</sup> 355.2169, found 355.2170. HPLC analysis: chiral OD-H column; detected at 254 nm, 40 °C; 10% *i*PrOH in *n*-hexane; flow = 0.7 mL/min; Retention time: 7.9 min (minor), 10.5 min (major).

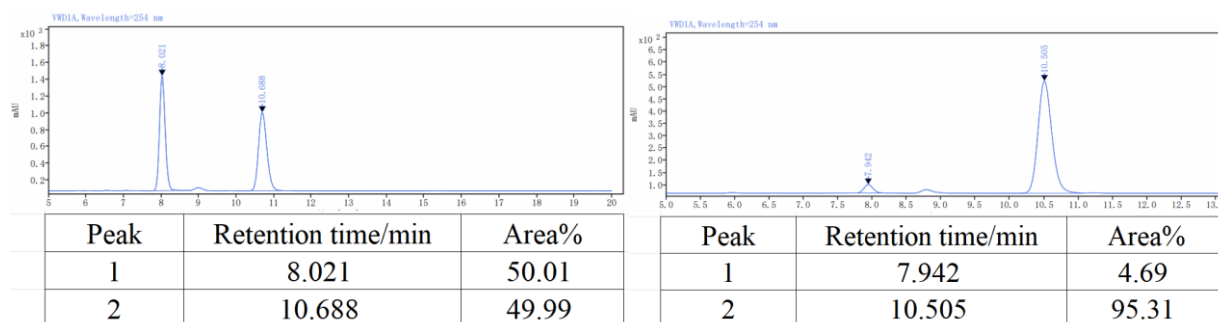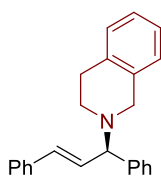

### (*R,E*)-2-(1,3-Diphenylallyl)-1,2,3,4-tetrahydroisoquinoline (**3c**)

Known compound<sup>[9]</sup>. White solid, 65% yield,  $[\alpha]_D^{25}$  -19.5 (*c* 0.80, CHCl<sub>3</sub>) for 93:7 er; <sup>1</sup>H NMR (500 MHz, chloroform-*d*)  $\delta$  7.57 – 7.47 (m, 2H), 7.47 – 7.21 (m, 8H), 7.09 – 7.19 (m, 3H), 7.00 (d, *J* = 7.3 Hz, 1H), 6.67 (d, *J* = 15.8 Hz, 1H), 6.44 (dd, *J* = 15.8, 8.8 Hz, 1H), 4.06 (d, *J* = 8.8 Hz, 1H), 3.84 (d, *J* = 15.1 Hz, 1H), 3.64 (d, *J* = 15.1 Hz, 1H), 2.91 (q, *J* = 6.5 Hz, 2H), 2.82 (t, *J* = 5.8 Hz, 2H). <sup>13</sup>C NMR (126 MHz, chloroform-*d*)  $\delta$  142.2, 136.9, 135.1, 134.7, 131.8, 131.3, 128.8, 128.7, 128.6, 128.0, 127.6, 127.4, 126.9, 126.5, 126.2, 125.7, 73.9, 54.8, 48.6, 29.2. HRMS (ESI): [M+H]<sup>+</sup> calcd for C<sub>24</sub>H<sub>24</sub>N<sup>+</sup> 326.1903, found 326.1904. HPLC analysis: chiral AD-H column; detected at 254 nm, 25 °C; 5% *i*PrOH in *n*-hexane; flow = 1.0 mL/min; Retention time: 4.9 min (major), 5.5 min (minor).

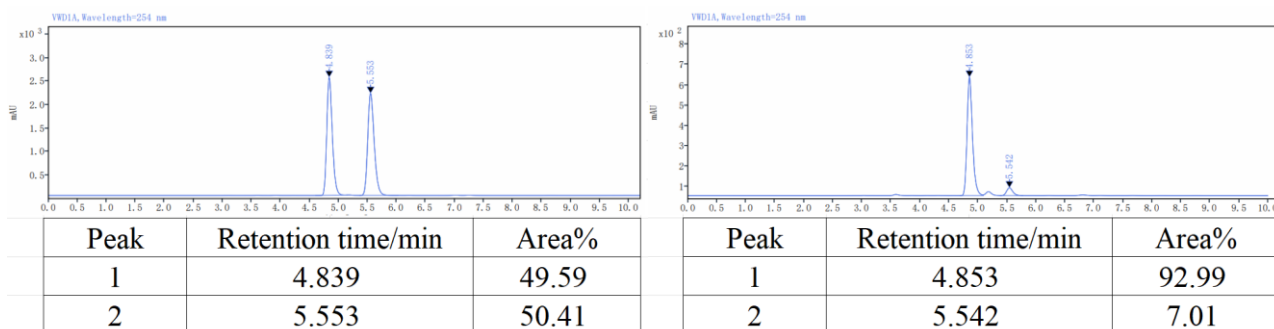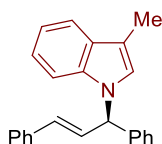

### (*R,E*)-1-(1,3-Diphenylallyl)-3-methyl-1*H*-indole (3d)

Known compound.<sup>[10]</sup> Yellow oil, 60% yield,  $[\alpha]_D^{25}$  -57.1 (*c* 0.48, CHCl<sub>3</sub>) for 98:2 er; <sup>1</sup>H NMR (500 MHz, chloroform-*d*)  $\delta$  7.66 – 7.56 (m, 1H), 7.40 – 7.22 (m, 11H), 7.20 – 7.08 (m, 2H), 6.96 (s, 1H), 6.70 (dd, *J* = 15.9, 6.5 Hz, 1H), 6.41 (dd, *J* = 15.9, 1.5 Hz, 1H), 6.24 (d, *J* = 6.5 Hz, 1H), 2.33 (s, 3H). <sup>13</sup>C NMR (126 MHz, chloroform-*d*)  $\delta$  139.9, 136.5, 136.3, 133.5, 129.2, 128.8, 128.7, 128.1, 128.0, 127.9, 127.6, 126.8, 123.9, 121.6, 119.1, 119.0, 110.9, 110.0, 61.4, 9.8. HRMS (ESI):  $[M+H]^+$  calcd for C<sub>24</sub>H<sub>22</sub>N<sup>+</sup> 324.1747, found 324.1750. HPLC analysis: chiral OD-H column; detected at 254 nm, 40 °C; 10% *i*PrOH in *n*-hexane; flow = 0.7 mL/min; Retention time: 7.7 min (minor), 10.6 min (major).

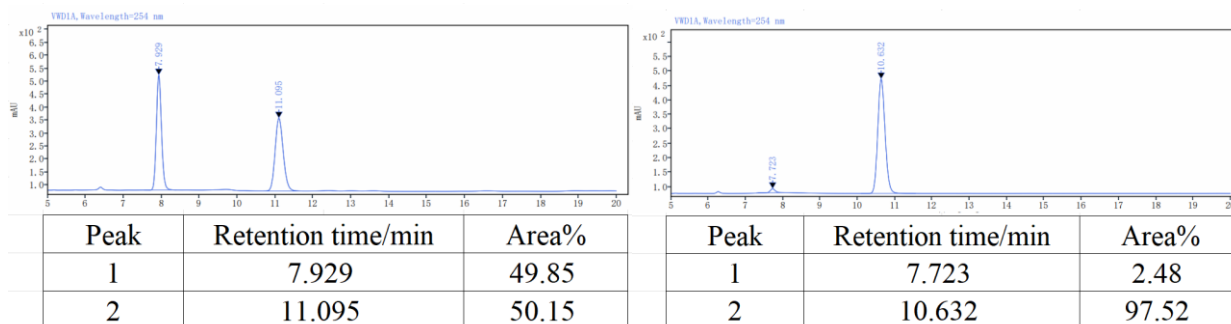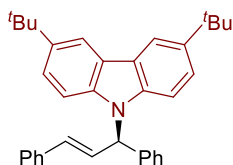

### (*R,E*)-3,6-Di-*tert*-butyl-9-(1,3-diphenylallyl)-9*H*-carbazole (3e)

Reaction time was 12 h. Colorless oil, 51% yield,  $[\alpha]_D^{25}$  -2.7 (*c* 0.51, CHCl<sub>3</sub>) for 93:7 er; <sup>1</sup>H NMR (500 MHz, chloroform-*d*)  $\delta$  8.11 (s, 2H), 7.44 – 7.16 (m, 14H), 6.91 (dd, *J* = 15.9, 7.1, 1H), 6.59 (d,



$J = 15.9$  Hz, 1H), 6.55 (d,  $J = 7.1$  Hz, 1H), 1.44 (s, 18H).  $^{13}\text{C}$  NMR (126 MHz, chloroform- $d$ )  $\delta$  141.9, 139.4, 138.6, 136.4, 134.0, 128.7, 128.6, 128.0, 127.7, 127.4, 126.8, 126.3, 123.5, 123.3, 116.3, 109.8, 60.0, 34.7, 32.1 (two aromatic carbon signals were not observed). HRMS (ESI):  $[\text{M}+\text{Na}]^{\oplus}$  calcd for  $\text{C}_{35}\text{H}_{37}\text{NNa}^{\oplus}$  494.2818, found 494.2822. HPLC analysis: chiral AD-H column; detected at 254 nm, 40 °C; 10%  $i$ PrOH in  $n$ -hexane; flow = 0.7 mL/min; Retention time: 4.8 min (major), 5.9 min (minor).

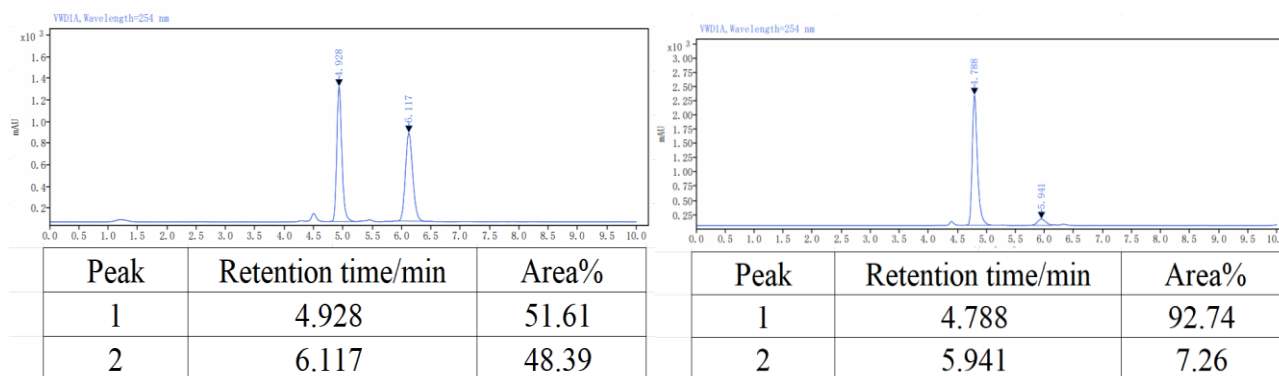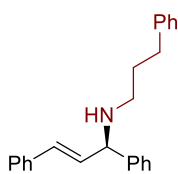

### **(*R,E*)-1,3-Diphenyl-*N*-(3-phenylpropyl)prop-2-en-1-amine (3f)**

$p$ -Xylene was used as the solvent. Yellow oil, 84% yield,  $[\alpha]_{\text{D}}^{25} -2.0$  ( $c$  0.90,  $\text{CHCl}_3$ ) for 96:4 er;  $^1\text{H}$  NMR (400 MHz, chloroform- $d$ )  $\delta$  7.54 – 7.08 (m, 15H), 6.54 (d,  $J = 15.8$  Hz, 1H), 6.29 (dd,  $J = 15.8$ , 7.4 Hz, 1H), 4.33 (d,  $J = 7.4$  Hz, 1H), 2.85 – 2.45 (m, 4H), 1.84 (m,  $J = 7.4$  Hz, 2H).  $^{13}\text{C}$  NMR (126 MHz, chloroform- $d$ )  $\delta$  143.1, 142.2, 137.0, 132.8, 130.2, 128.7, 128.6, 128.45, 128.39, 127.5, 127.4, 127.3, 126.5, 125.8, 65.7, 47.3, 33.7, 31.9. HRMS (ESI):  $[\text{M}+\text{H}]^{\oplus}$  calcd for  $\text{C}_{24}\text{H}_{26}\text{N}^{\oplus}$  328.2060, found 328.2061. HPLC analysis: chiral OD-H column; detected at 254 nm, 40 °C; 10%  $i$ PrOH in  $n$ -hexane; flow = 0.7 mL/min; Retention time: 8.4 min (minor), 12.3 min (major).

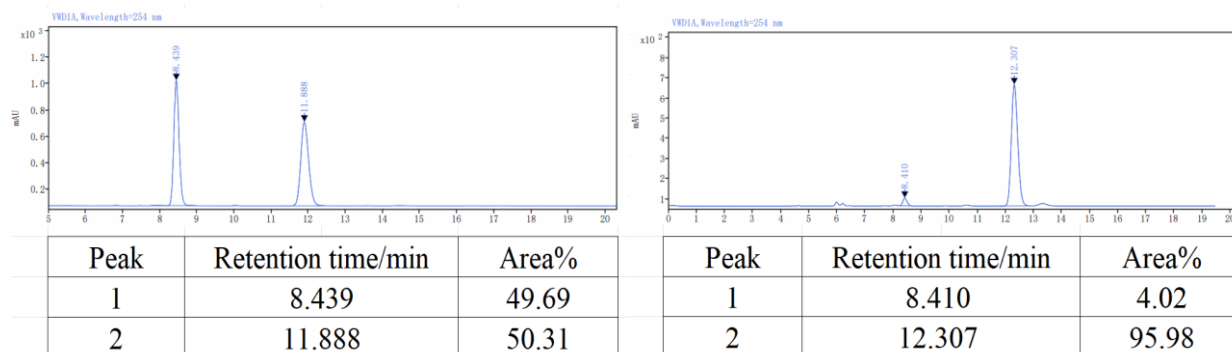

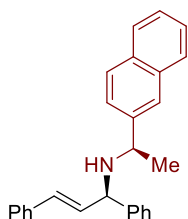

**(*R,E*)-*N*-((*R*)-1-(Naphthalen-2-yl)ethyl)-1,3-diphenylprop-2-en-1-amine (3g)**

*p*-Xylene was used as the solvent. Yellow oil, 77% yield,  $[\alpha]_{\text{D}}^{25} -7.4$  (*c* 0.98,  $\text{CHCl}_3$ ) for >20:1 dr;  $^1\text{H}$  NMR (400 MHz, chloroform-*d*)  $\delta$  7.88 – 7.75 (m, 3H), 7.63 (d, *J* = 1.7 Hz, 1H), 7.50 – 7.42 (m, 3H), 7.39 – 7.32 (m, 2H), 7.32 – 7.20 (m, 7H), 7.20 – 7.13 (m, 1H), 6.44 (dd, *J* = 15.9, 1.2 Hz, 1H), 6.29 (dd, *J* = 15.9, 6.6 Hz, 1H), 4.20 (dd, *J* = 6.6, 1.2 Hz, 1H), 3.82 (q, *J* = 6.6 Hz, 1H), 1.41 (d, *J* = 6.6 Hz, 3H).  $^{13}\text{C}$  NMR (126 MHz, chloroform-*d*)  $\delta$  143.0, 137.1, 133.6, 133.2, 132.9, 129.7, 128.7, 128.5, 128.4, 127.8, 127.7, 127.6, 127.4, 127.3, 126.4, 126.0, 125.6, 125.5, 125.0, 62.3, 55.0, 24.6 (one aromatic carbon signal was not observed because of overlapping). HRMS (ESI):  $[\text{M}+\text{H}]^{\oplus}$  calcd for  $\text{C}_{27}\text{H}_{26}\text{N}^{\oplus}$  364.2060, found 364.2061.

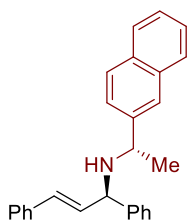

**(*R,E*)-*N*-((*S*)-1-(Naphthalen-2-yl)ethyl)-1,3-diphenylprop-2-en-1-amine (3h)**

*p*-Xylene was used as the solvent. Yellow oil, 81% yield,  $[\alpha]_{\text{D}}^{25} -131.8$  (*c* 0.48,  $\text{CHCl}_3$ ) for 9:1 dr;  $^1\text{H}$  NMR (400 MHz, chloroform-*d*)  $\delta$  7.88 – 7.79 (m, 3H), 7.73 (d, *J* = 1.7 Hz, 1H), 7.54 – 7.45 (m, 3H), 7.41 – 7.35 (m, 4H), 7.34 – 7.28 (m, 4H), 7.27 – 7.19 (m, 2H), 6.42 (d, *J* = 15.8 Hz, 1H), 6.27 (dd, *J* = 15.8, 8.0 Hz, 1H), 4.19 (d, *J* = 8.0 Hz, 1H), 4.14 (q, *J* = 6.6 Hz, 1H), 1.47 (d, *J* = 6.6 Hz, 3H).  $^{13}\text{C}$  NMR (126 MHz, chloroform-*d*)  $\delta$  143.4, 143.0, 137.0, 133.5, 132.9, 132.0, 131.1, 128.58, 128.57, 128.4, 127.8, 127.7, 127.5, 127.20, 127.18, 126.4, 126.0, 125.5, 124.8, 62.1, 55.2, 24.5 (one aromatic carbon signal was not observed because of overlapping). HRMS (ESI):  $[\text{M}+\text{H}]^{\oplus}$  calcd for  $\text{C}_{27}\text{H}_{26}\text{N}^{\oplus}$  364.2060, found 364.2060.

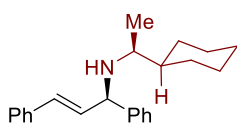

**(*R,E*)-*N*-((*S*)-1-Cyclohexylethyl)-1,3-diphenylprop-2-en-1-amine (3i)**

*p*-Xylene was used as the solvent. Yellow oil, 51% yield,  $[\alpha]_{\text{D}}^{25} +20.5$  (*c* 0.76,  $\text{CHCl}_3$ ) for 13:1 dr;  $^1\text{H}$  NMR (400 MHz, Chloroform-*d*)  $\delta$  7.40 – 7.30 (m, 6H), 7.29 – 7.23 (m, 3H), 7.22 – 7.16 (m, 1H), 6.51 (d, *J* = 15.8 Hz, 1H), 6.31 (dd, *J* = 15.8, 7.1 Hz, 1H), 4.49 (d, *J* = 7.1 Hz, 1H), 2.46 – 2.36 (m, 1H), 1.76 – 1.69 (m, 3H), 1.67 – 1.60 (m, 2H), 1.36 – 1.05 (m, 5H), 1.02 (d, *J* = 6.5 Hz, 3H), 0.99 – 0.90 (m, 1H).  $^{13}\text{C}$  NMR (126 MHz, chloroform-*d*)  $\delta$  143.4, 137.2, 133.8, 129.6, 128.5, 127.6, 127.4, 127.1, 126.5, 62.7, 54.3, 43.5, 29.8, 28.4, 26.9, 26.8, 26.6, 17.0 (one aromatic carbon signal was not observed because of overlapping). HRMS (ESI):  $[\text{M}+\text{H}]^{\oplus}$  calcd for  $\text{C}_{23}\text{H}_{30}\text{N}^{\oplus}$  320.2373, found 320.2374.

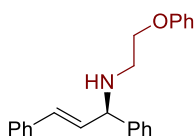

**(*R,E*)-*N*-(2-Phenoxyethyl)-1,3-diphenylprop-2-en-1-amine (3j)**

$[\text{Pd}(\text{allyl})\text{Cl}]_2$  (4 mol%), **L11** (8.8 mol%),  $\text{NaBAr}^{\text{F}}_4$  (8.8 mol%) and **2j** (5 equiv) with *p*-xylene as the solvent were used. Yellow oil, 65% yield,  $[\alpha]_{\text{D}}^{25} +1.2$  (*c* 0.58,  $\text{CHCl}_3$ ) for 96:4 er;  $^1\text{H}$  NMR (400 MHz, chloroform-*d*)  $\delta$  7.46 – 7.40 (m, 2H), 7.39 – 7.32 (m, 4H), 7.31 – 7.23 (m, 5H), 7.23 – 7.17 (m, 1H), 6.97 – 6.92 (m, 1H), 6.92 – 6.88 (m, 2H), 6.60 (d, *J* = 15.8 Hz, 1H), 6.32 (dd, *J* = 15.8, 7.5 Hz, 1H), 4.44 (d, *J* = 7.5 Hz, 1H), 4.10 (t, *J* = 5.2 Hz, 2H), 3.05 (dt, *J* = 12.7, 5.2 Hz, 1H), 2.95 (dt, *J* = 12.7, 5.2 Hz, 1H).  $^{13}\text{C}$  NMR (126 MHz, chloroform-*d*)  $\delta$  158.9, 142.8, 137.0, 132.6, 130.4, 129.5, 128.7, 128.6, 127.6, 127.42, 127.41, 126.5, 120.9, 114.6, 67.4, 65.6, 46.7. HRMS (ESI):  $[\text{M}+\text{H}]^{\oplus}$  calcd for  $\text{C}_{23}\text{H}_{24}\text{ON}^{\oplus}$  330.1852, found 330.1853. HPLC analysis: chiral OD-H column; detected at 254 nm, 40 °C; 20% *i*PrOH in *n*-hexane; flow = 0.8 mL/min; Retention time: 11.2 min (minor), 18.8 min (major).

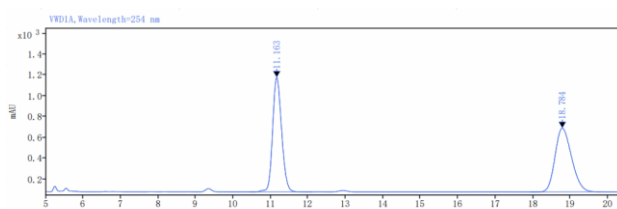

| Peak | Retention time/min | Area% |
|------|--------------------|-------|
| 1    | 11.163             | 49.47 |
| 2    | 18.784             | 50.53 |

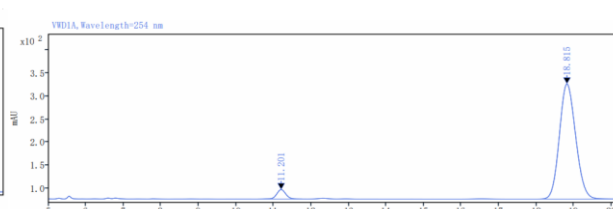

| Peak | Retention time/min | Area% |
|------|--------------------|-------|
| 1    | 11.201             | 4.29  |
| 2    | 18.815             | 95.71 |

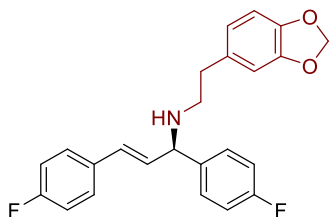

**(*R,E*)-*N*-(2-(Benzo[d][1,3]dioxol-5-yl)ethyl)-1,3-bis(4-fluorophenyl)prop-2-en-1-amine (3k)**

[Pd(allyl)Cl]<sub>2</sub> (4 mol%), **L11** (8.8 mol%) and NaBARF<sub>4</sub> (8.8 mol%) with *p*-xylene as the solvent were used. Yellow oil, 55% yield, [ $\alpha$ ]<sub>D</sub><sup>25</sup> -5.6 (*c* 0.49, CHCl<sub>3</sub>) for 95:5 er; <sup>1</sup>H NMR (400 MHz, chloroform-*d*)  $\delta$  7.30 (tdd, *J* = 7.0, 5.3, 2.2 Hz, 4H), 7.05 – 6.93 (m, 4H), 6.73 (d, *J* = 7.8 Hz, 1H), 6.69 – 6.61 (m, 2H), 6.47 (d, *J* = 15.8 Hz, 1H), 6.14 (dd, *J* = 15.8, 7.4 Hz, 1H), 5.92 (s, 2H), 4.32 (d, *J* = 7.4 Hz, 1H), 2.91 – 2.69 (m, 4H). <sup>13</sup>C NMR (126 MHz, chloroform-*d*)  $\delta$  163.2 (d, *J* = 33.0 Hz), 161.2 (d, *J* = 31.5 Hz), 147.8, 146.0, 138.5, 133.7, 133.0 (d, *J* = 3.4 Hz), 132.2, 129.2, 128.8 (d, *J* = 7.9 Hz), 128.0 (d, *J* = 8.1 Hz), 121.6, 115.6 (d, *J* = 1.7 Hz), 115.4, 109.1, 108.3, 100.9, 64.9, 49.0, 36.1. <sup>19</sup>F NMR (376 MHz, chloroform-*d*)  $\delta$  -114.30 (s), -115.25 (s). HRMS (ESI): [M+H]<sup>+</sup> calcd for C<sub>24</sub>H<sub>22</sub>O<sub>2</sub>NF<sub>2</sub><sup>+</sup> 394.1613, found 394.1617. HPLC analysis: chiral OJ-H column; detected at 254 nm, 40 °C; 20% <sup>t</sup>PrOH in *n*-hexane; flow = 1.0 mL/min; Retention time: 22.7 min (minor), 24.2 min (major).

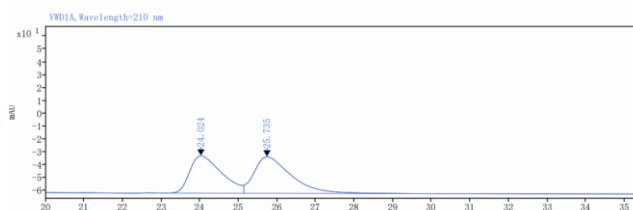

| Peak | Retention time/min | Area% |
|------|--------------------|-------|
| 1    | 24.024             | 46.88 |
| 2    | 25.735             | 53.12 |

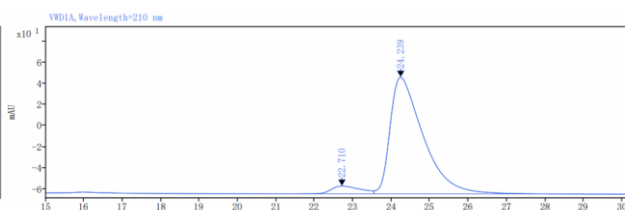

| Peak | Retention time/min | Area% |
|------|--------------------|-------|
| 1    | 22.710             | 5.41  |
| 2    | 24.239             | 94.59 |

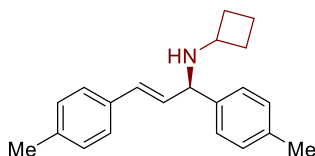

**(*R,E*)-*N*-(1,3-Di-*p*-tolylallyl)cyclobutanamine (3l)**

Yellow oil, 61% yield, [ $\alpha$ ]<sub>D</sub><sup>25</sup> -1.5 (*c* 0.61, CHCl<sub>3</sub>) for 96:4 er; <sup>1</sup>H NMR (400 MHz, chloroform-*d*)  $\delta$  7.29 – 7.21 (m, 4H), 7.14 (d, *J* = 7.8 Hz, 2H), 7.08 (d, *J* = 7.8 Hz, 2H), 6.50 (d, *J* = 15.7 Hz, 1H), 6.22 (dd, *J* = 15.8, 7.7 Hz, 1H), 4.30 (d, *J* = 7.6 Hz, 1H), 3.35 – 3.15 (m, 1H), 2.33 (s, 3H), 2.31 (s, 3H), 2.27 – 2.12 (m, 2H), 1.75 – 1.65 (m, 3H), 1.60 – 1.52 (m, 1H). <sup>13</sup>C NMR (126 MHz, chloroform-*d*)  $\delta$  140.2, 137.2, 136.9, 134.3, 131.9, 129.8, 129.3, 129.2, 127.3, 126.4, 62.8, 51.8,

31.74, 31.71, 21.24, 21.17, 14.8. HRMS (ESI):  $[M+H]^+$  calcd for  $C_{21}H_{26}N^+$  292.2060, found 292.2059. HPLC analysis: chiral AD-H column; detected at 254 nm, 30 °C; 1% *i*PrOH in *n*-hexane; flow = 0.7 mL/min; Retention time: 14.8 min (major), 18.8 min (minor).

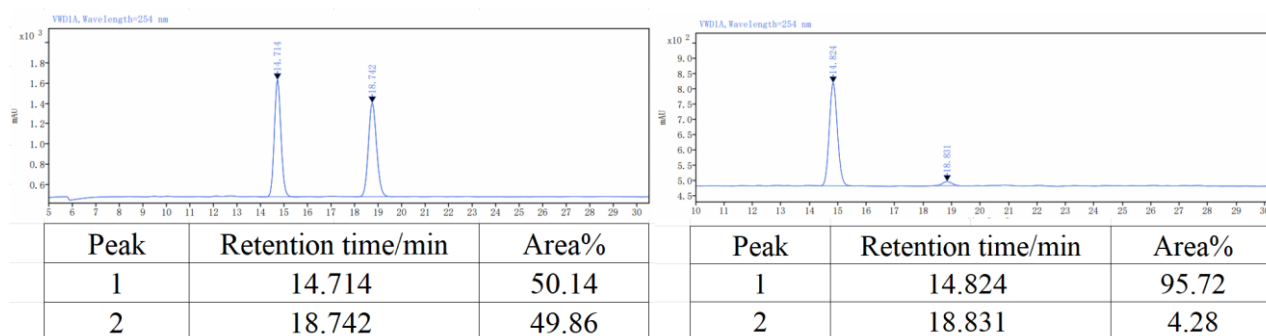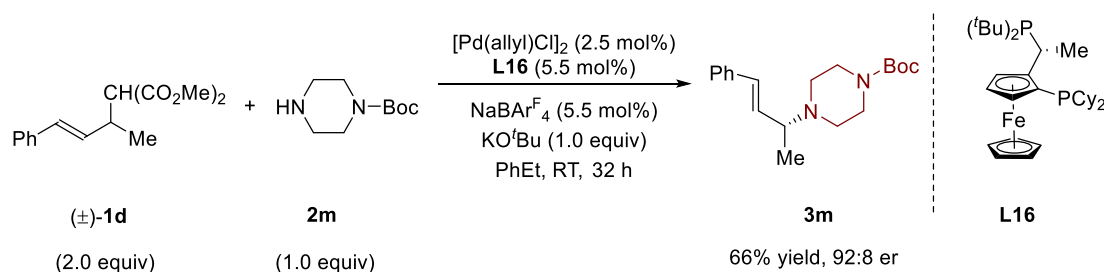

**tert-Butyl (S,E)-4-(4-phenylbut-3-en-2-yl)piperazine-1-carboxylate (3m).** In a nitrogen-filled glovebox, to a 4 mL vial with  $[\text{Pd(allyl)Cl}]_2$  (0.9 mg, 0.0025 mmol), **L16** (3.0 mg, 0.0055 mmol), sodium tetrakis[3,5-bis(trifluoromethyl)phenyl]borate ( $\text{NaBARF}_4$ , 4.9 mg, 0.0055 mmol), alkene **1d** (52 mg, 0.20 mmol), amine **2m** (0.10 mmol) and  $\text{KO}^t\text{Bu}$  (11 mg, 0.10 mmol) was added dry PhEt (0.20 mL). The resulting mixture was stirred at room temperature for 32 h. After this time, the reaction was concentrated and purified by flash column chromatography to afford the pure product **3m** as a light-yellow oil (21 mg) in 66% yield.  $[\alpha]_D^{25} +49.9$  (c 1.01,  $\text{CHCl}_3$ ) for 92:8 er.  $^1\text{H}$  NMR (500 MHz, chloroform-*d*)  $\delta$  7.36 (d,  $J = 7.5$  Hz, 2H), 7.31 (dd,  $J = 8.4, 6.9$  Hz, 2H), 7.25 – 7.20 (m, 1H), 6.45 (d,  $J = 15.9$  Hz, 1H), 6.17 (dd,  $J = 15.9, 8.0$  Hz, 1H), 3.44 (t,  $J = 5.2$  Hz, 4H), 3.12 – 3.06 (m, 1H), 2.61 – 2.43 (m, 7.5 Hz, 4H), 1.45 (s, 9H), 1.26 (d,  $J = 6.8$  Hz, 3H).  $^{13}\text{C}$  NMR (126 MHz, chloroform-*d*)  $\delta$  154.8, 137.0, 131.9, 131.2, 128.6, 127.5, 126.3, 79.6, 62.6, 49.8, 28.5, 17.7 (one alkyl carbon signal was not observed because of overlapping). HRMS (ED):  $[M]^+$  calcd for  $C_{19}H_{28}N_2O_2^+$  316.2145, found 316.2141. HPLC analysis: Chiralcel IE column; detected at 254 nm, 25 °C; 2% *i*PrOH in *n*-hexane; flow = 1.5 mL/min; Retention time: 9.2 min (major), 9.8 min (minor).

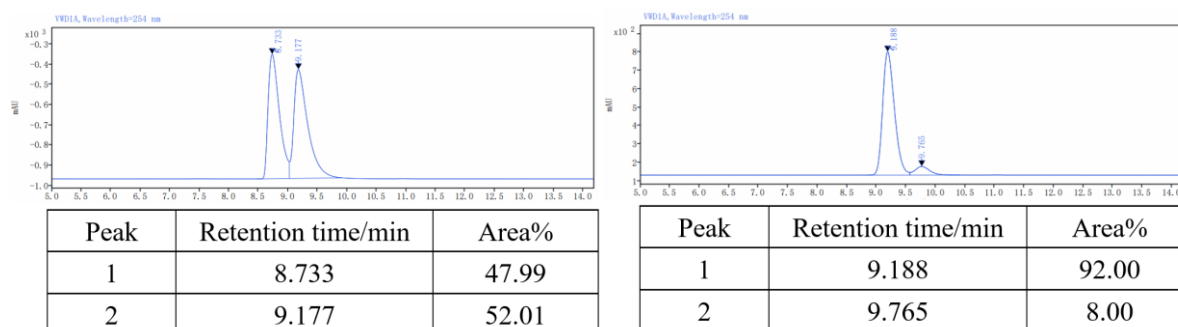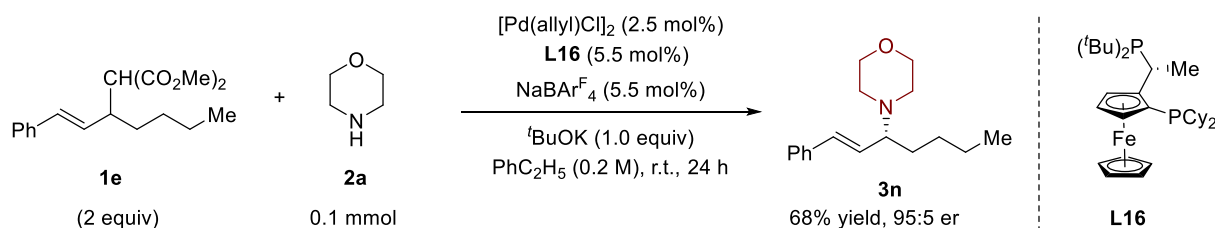

**(*S,E*)-1-(1-phenylhept-1-en-3-yl)piperazine (3n)**. Known compound.<sup>[11]</sup> In a nitrogen-filled glovebox, to a 4 mL vial were added [Pd(allyl)Cl]<sub>2</sub> (0.9 mg, 0.0025 mmol), **L16** (3.0 mg, 0.0055 mmol), sodium tetrakis[3,5-bis(trifluoromethyl)phenyl]borate (NaBARF<sub>4</sub>, 4.9 mg, 0.0055 mmol), racemic alkene **1e** (0.20 mmol), KO<sup>t</sup>Bu (11 mg, 0.10 mmol) and dry PhEt (0.50 mL). Then the reaction was stirred at room temperature for 1 min. Next, amine nucleophile **2a** (0.10 mmol) was added to the reaction and the resulting mixture was stirred at room temperature for 24 h. After this time, the reaction was concentrated and purified by flash column chromatography to afford the pure product **3n** as a colorless oil in 68% yield.  $[\alpha]_D^{25} +15.1$  (c 0.88, CHCl<sub>3</sub>) for 95:5 er. <sup>1</sup>H NMR (500 MHz, chloroform-*d*)  $\delta$  7.38 (d, *J* = 7.5 Hz, 2H), 7.32 (t, *J* = 7.5 Hz, 2H), 7.23 (t, *J* = 7.5 Hz, 1H), 6.44 (d, *J* = 15.9 Hz, 1H), 6.10 (dd, *J* = 15.9, 9.1 Hz, 1H), 3.77 – 3.65 (m, 4H), 2.89 – 2.79 (m, 1H), 2.71 – 2.47 (m, 4H), 1.78 – 1.67 (m, 1H), 1.55 – 1.45 (m, 1H), 1.39 – 1.20 (m, 4H), 0.88 (t, *J* = 6.8 Hz, 3H). <sup>13</sup>C NMR (126 MHz, chloroform-*d*)  $\delta$  137.0, 132.9, 129.9, 128.6, 127.5, 126.4, 68.5, 67.4, 50.7, 31.7, 28.6, 22.9, 14.2. HPLC analysis: Chiralcel OD-H column; detected at 254 nm, 40 °C; 20% <sup>i</sup>PrOH in *n*-hexane; flow = 0.7 mL/min; Retention time: 6.4 min (major), 7.4 min (minor).

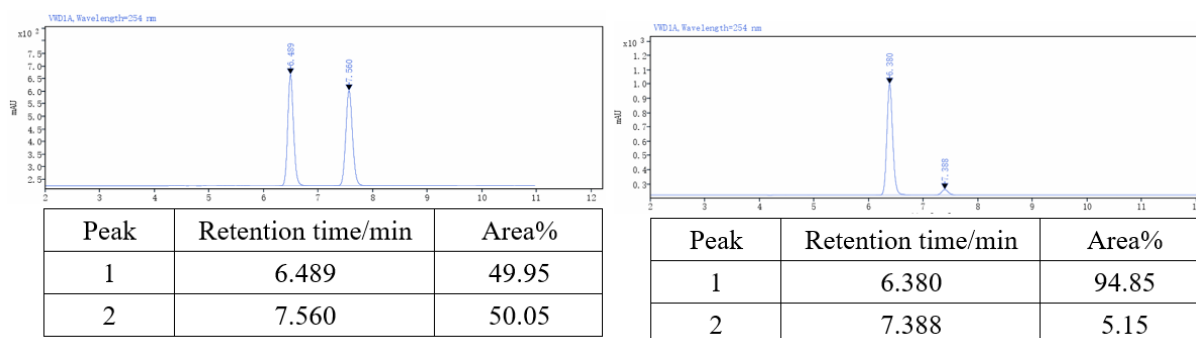

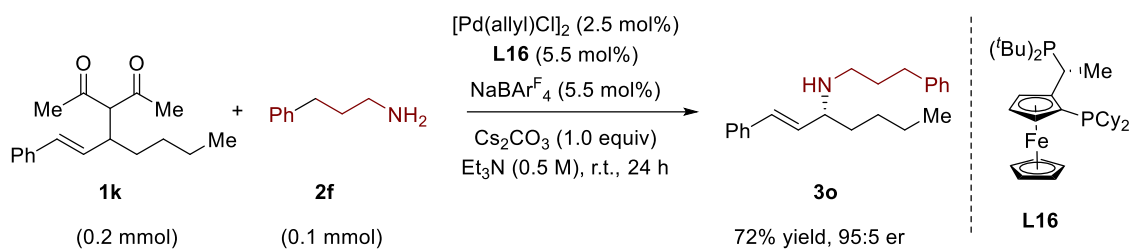

**(*S,E*)-1-Phenyl-*N*-(3-phenylpropyl)hept-1-en-3-amine (3o).** In a nitrogen-filled glovebox, to a 4 mL vial were added [Pd(allyl)Cl]<sub>2</sub> (0.9 mg, 0.0025 mmol), **L16** (3.0 mg, 0.0055 mmol), sodium tetrakis[3,5-bis(trifluoromethyl)phenyl]borate (NaBAR<sup>F</sup><sub>4</sub>, 4.9 mg, 0.0055 mmol), racemic alkene **1k** (0.20 mmol), Cs<sub>2</sub>CO<sub>3</sub> (33 mg, 0.10 mmol) and dry Et<sub>3</sub>N (0.20 mL). Then the reaction was stirred at room temperature for 1 min. Next, amine nucleophile **2f** (0.10 mmol) was added to the reaction and the resulting mixture was stirred at room temperature for 24 h. After this time, the reaction was concentrated and purified by flash column chromatography to afford the pure product **3o** as a light yellow oil in 72% yield; [ $\alpha$ ]<sub>D</sub><sup>25</sup> +42.9 (*c* 0.74, CHCl<sub>3</sub>) for 95:5 er; <sup>1</sup>H NMR (400 MHz, chloroform-*d*)  $\delta$  7.38 (d, *J* = 7.2 Hz, 2H), 7.32 (t, *J* = 7.5 Hz, 2H), 7.28 - 7.20 (m, 3H), 7.20 - 7.14 (m, 3H), 6.43 (d, *J* = 15.8 Hz, 1H), 5.99 (dd, *J* = 15.8, 8.4 Hz, 1H), 3.23 - 3.04 (m, 1H), 2.79 - 2.52 (m, 4H), 1.87 - 1.79 (m, 2H), 1.65 - 1.43 (m, 2H), 1.37 - 1.20 (m, 5H), 0.98 - 0.81 (m, 3H). <sup>13</sup>C NMR (126 MHz, chloroform-*d*)  $\delta$  142.2, 137.2, 133.4, 131.1, 128.6, 128.44, 128.39, 127.4, 126.4, 125.8, 61.6, 47.1, 35.9, 33.8, 31.9, 28.4, 22.8, 14.1. HRMS (EI): [M]<sup>+</sup> calcd for C<sub>22</sub>H<sub>30</sub>N<sup>+</sup> 308.2373, found 308.2371. HPLC analysis: Chiracel OD-H column; detected at 254 nm, 40 °C; 20% *i*PrOH in *n*-hexane; flow = 0.8 mL/min; Retention time: 4.8 min (major), 5.4 min (minor).

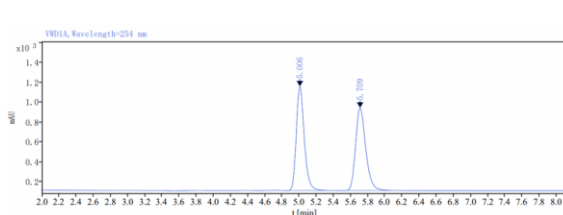

| Peak | Retention time/min | Area% |
|------|--------------------|-------|
| 1    | 5.006              | 49.90 |
| 2    | 5.709              | 50.10 |

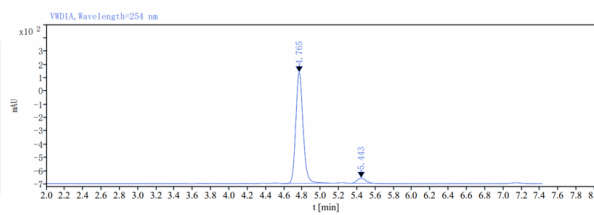

| Peak | Retention time/min | Area% |
|------|--------------------|-------|
| 1    | 4.765              | 94.94 |
| 2    | 5.443              | 5.06  |

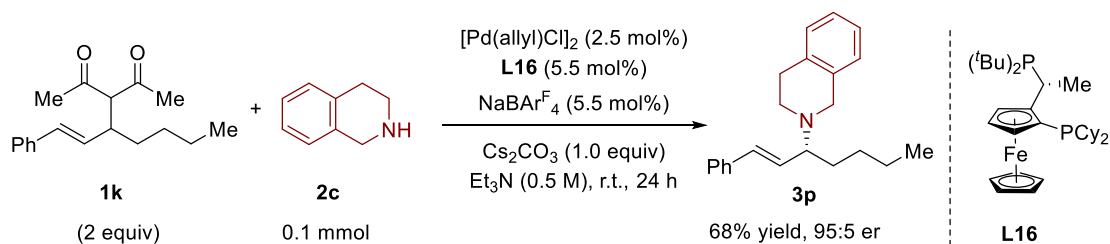

**(*S,E*)-2-(1-Phenylhept-1-en-3-yl)-1,2,3,4-tetrahydroisoquinoline (3p).** In a nitrogen-filled glovebox, to a 4 mL vial were added [Pd(allyl)Cl]<sub>2</sub> (0.9 mg, 0.0025 mmol), **L16** (3.0 mg, 0.0055 mmol), sodium tetrakis[3,5-bis(trifluoromethyl)phenyl]borate (NaBAR<sup>F</sup><sub>4</sub>, 4.9 mg, 0.0055 mmol), racemic alkene **1k** (0.20 mmol), Cs<sub>2</sub>CO<sub>3</sub> (32.5 mg, 0.10 mmol) and dry Et<sub>3</sub>N (0.20 mL). Then the reaction was stirred at room temperature for 1 min. Next, amine nucleophile **2c** (0.10 mmol) was added to the reaction and the resulting mixture was stirred at room temperature for 24 h. After this time, the reaction was concentrated and purified by flash column chromatography to afford the pure product **3p** as a light yellow oil in 68% yield; [ $\alpha$ ]<sub>D</sub><sup>25</sup> +19.5 (*c* 0.76, CHCl<sub>3</sub>) for 95:5 er; <sup>1</sup>H NMR (400 MHz, chloroform-*d*)  $\delta$  7.41 (d, *J* = 7.4 Hz, 2H), 7.33 (t, *J* = 7.6 Hz, 2H), 7.27 – 7.21 (m, 1H), 7.14 – 7.07 (m, 3H), 7.05 – 7.00 (m, 1H), 6.52 (d, *J* = 15.8 Hz, 1H), 6.22 (dd, *J* = 15.8, 9.0 Hz, 1H), 3.86 (d, *J* = 14.9 Hz, 1H), 3.79 (d, *J* = 14.9 Hz, 1H), 3.20 – 3.10 (m, 1H), 3.05 – 2.97 (m, 1H), 2.91 (t, *J* = 5.7 Hz, 2H), 2.86 – 2.76 (m, 1H), 1.94 – 1.80 (m, 1H), 1.74 – 1.64 (m, 1H), 1.43 – 1.23 (m, 4H), 0.90 (t, *J* = 6.7 Hz, 3H). <sup>13</sup>C NMR (126 MHz, chloroform-*d*)  $\delta$  137.0, 134.9, 134.5, 133.1, 129.4, 128.73, 128.67, 127.6, 126.8, 126.4, 126.1, 125.7, 67.5, 52.8, 47.1, 32.1, 29.3, 28.8, 22.9, 14.2. HRMS (EI): [M]<sup>+</sup> calcd for C<sub>22</sub>H<sub>28</sub>N<sup>+</sup> 306.2216, found 306.2211. HPLC analysis: Chiracel AD-H column; detected at 254 nm, 25 °C; 5% <sup>i</sup>PrOH in *n*-hexane; flow = 1.0 mL/min; Retention time: 3.8 min (minor), 4.2 min (major).

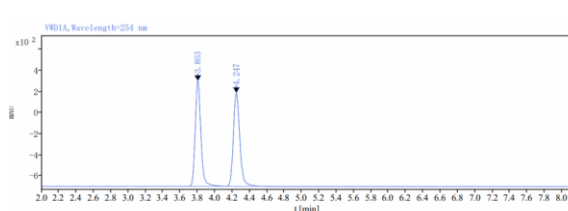

| Peak | Retention time/min | Area% |
|------|--------------------|-------|
| 1    | 3.803              | 49.93 |
| 2    | 4.247              | 50.07 |

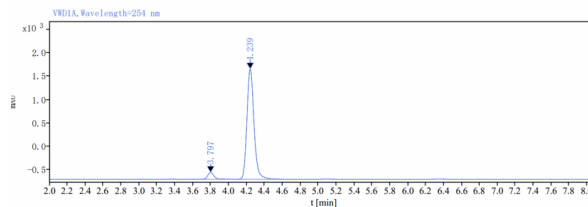

| Peak | Retention time/min | Area% |
|------|--------------------|-------|
| 1    | 3.797              | 5.03  |
| 2    | 4.239              | 94.97 |

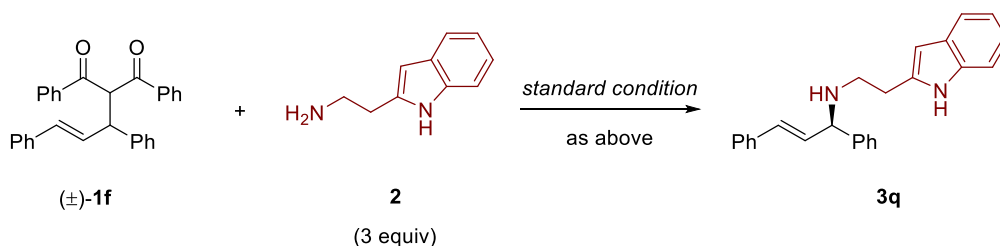

**(*R,E*)-*N*-(2-(1*H*-Indol-2-yl)ethyl)-1,3-diphenylprop-2-en-1-amine (3q).** The procedure for this transformation was identical to that described above for the amination of allylic C-C bonds, except that *rac*-**1f** was used as the electrophile, Cs<sub>2</sub>CO<sub>3</sub> (1 equiv) was used as the base and the reaction was stirred at 0 °C. Light yellow solid, 67% yield, [ $\alpha$ ]<sub>D</sub><sup>25</sup> -11.4 (*c* 0.95, CHCl<sub>3</sub>) for 96:4 er; <sup>1</sup>H NMR (400



MHz, chloroform-*d*)  $\delta$  7.98 (s, 1H), 7.58 (d,  $J = 7.9$  Hz, 1H), 7.36 – 7.27 (m, 8H), 7.25 – 7.16 (m, 4H), 7.09 (t,  $J = 7.5$  Hz, 1H), 7.01 (d,  $J = 2.2$  Hz, 1H), 6.51 (d,  $J = 15.9$  Hz, 1H), 6.29 (dd,  $J = 15.9$ , 7.4 Hz, 1H), 4.38 (d,  $J = 7.4$  Hz, 1H), 3.01 (m, 3H), 2.97 – 2.85 (m, 1H), 2.28 (br s, 1H).  $^{13}\text{C}$  NMR (126 MHz, chloroform-*d*)  $\delta$  143.0, 137.0, 136.4, 132.8, 130.2, 128.6, 128.5, 127.51, 127.46, 127.4, 127.3, 126.5, 122.1, 122.0, 119.3, 119.0, 114.0, 111.2, 65.6, 47.6, 25.8. HRMS (ESI):  $[\text{M}+\text{H}]^{\oplus}$  calcd for  $\text{C}_{25}\text{H}_{25}\text{N}_2^{\oplus}$  353.2012, found 353.2015. HPLC analysis: chiral OD-H column; detected at 254 nm, 40 °C; 20% *i*PrOH in *n*-hexane; flow = 1.5 mL/min; Retention time: 9.3 min (minor), 13.8 min (major).

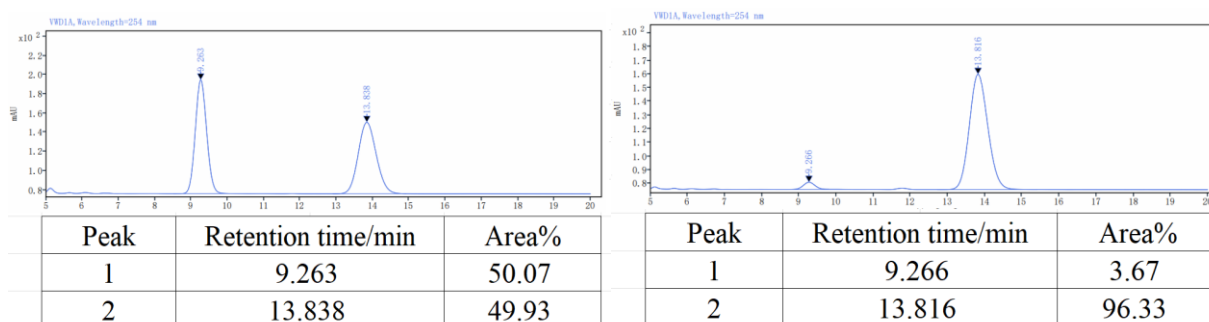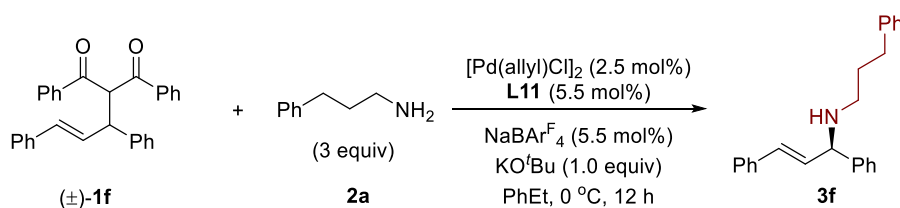

The procedure for this transformation was identical to that described above for the amination of allylic C-C bonds, except that *rac*-**3f** was used as the electrophile and the reaction was stirred at 0 °C for 12 h. The product **3f** was isolated in 52% yield and with 94:6 er.

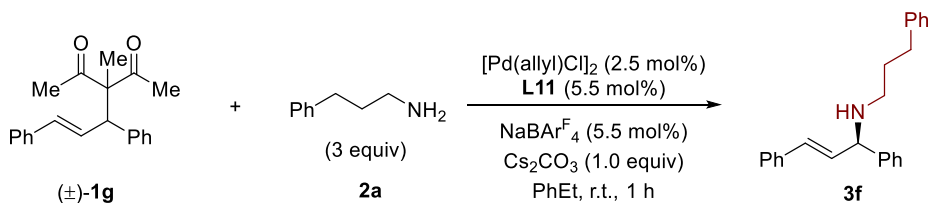

The procedure for this transformation was identical to that described above for the amination of allylic C-C bonds, except that *rac*-**1g** was used as the electrophile and  $\text{Cs}_2\text{CO}_3$  was used as the base. The reaction time was 1 h and the product **3f** was isolated in 67% yield and with 93:7 er.

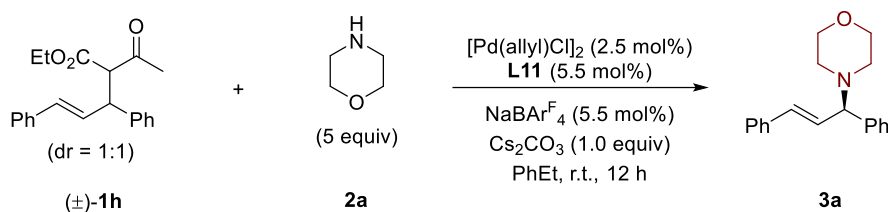

The procedure for this transformation was identical to that described above for the amination of allylic C–C bonds, except that *rac*-**1h** as the electrophile, **2a** (5 equiv) as the nucleophile and  $\text{Cs}_2\text{CO}_3$  as the base were used. The reaction time was 12 h and the product **3a** was isolated in 58% yield and with 94:6 er.

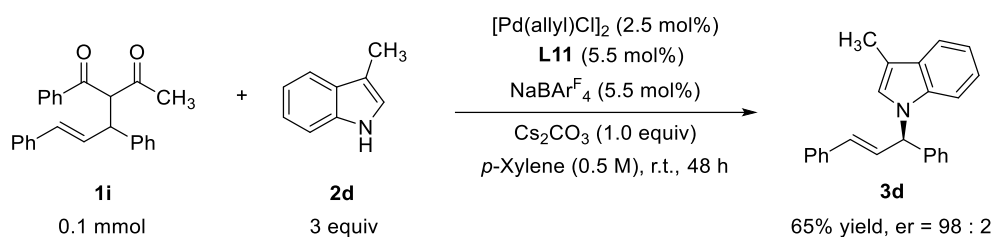

In a nitrogen-filled glovebox, to a 4 mL vial were added alkene **1i** (0.10 mmol),  $[\text{Pd}(\text{allyl})\text{Cl}]_2$  (0.9 mg, 0.0025 mmol), **L11** (4.8 mg, 0.0055 mmol), sodium tetrakis[3,5-bis(trifluoromethyl)phenyl]borate ( $\text{NaBAR}_4^{\text{F}}$ , 4.9 mg, 0.0055 mmol),  $\text{Cs}_2\text{CO}_3$  (32.5 mg, 0.10 mmol), amine nucleophile **2d** (0.30 mmol) and dry *p*-Xylene (0.20 mL). Then the resulting mixture was stirred at room temperature for 48 h. After this time, the reaction was concentrated and purified by flash column chromatography to afford the pure product. In this case, the product **3d** was isolated in 65% yield and with 98:2 er.

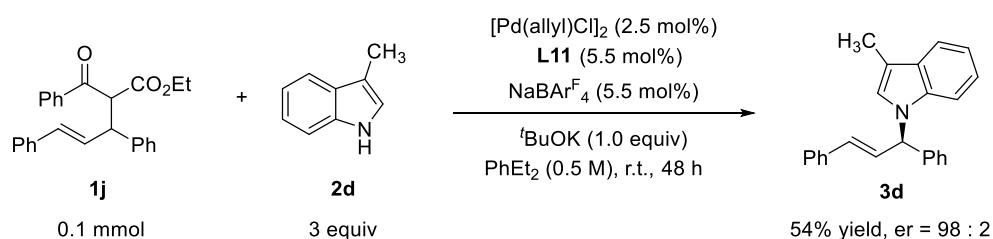

In a nitrogen-filled glovebox, to a 4 mL vial were added alkene **1j** (0.10 mmol),  $[\text{Pd}(\text{allyl})\text{Cl}]_2$  (0.9 mg, 0.0025 mmol), **L11** (4.8 mg, 0.0055 mmol), sodium tetrakis[3,5-bis(trifluoromethyl)phenyl]borate ( $\text{NaBAR}_4^{\text{F}}$ , 4.9 mg, 0.0055 mmol),  $\text{KO}^t\text{Bu}$  (11.2 mg, 0.10 mmol), amine nucleophile **2d** (0.30 mmol) and dry PhEt (0.20 mL). Then the resulting mixture was stirred at room temperature for 48 h. After this time, the reaction was concentrated and purified by flash column chromatography to afford the pure product. In this case, the product **3d** was isolated in 54% yield and with 98:2 er.

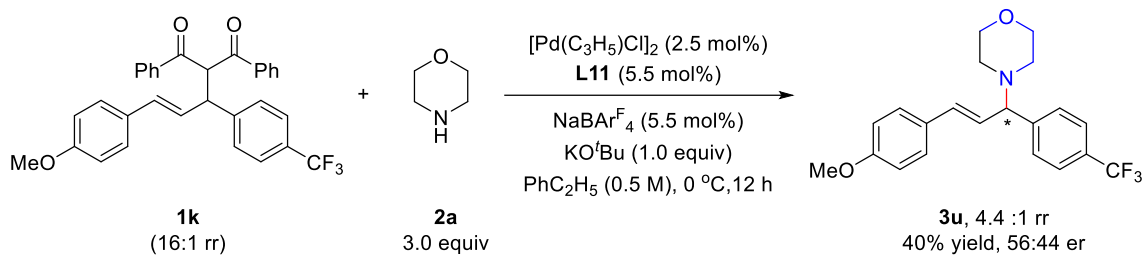

**(E)-4-(3-(4-Methoxyphenyl)-1-(4-(trifluoromethyl)phenyl)allyl)morpholine (3u).** The procedure for this transformation was identical to that described above for the amination of allylic C-C bonds, except that *rac*-**1k** was used as the electrophile and the reaction was stirred at 0 °C for 12 h. The regioselectivity of the products was 4.4:1 and the two regioisomers could be isolated from each other. The pure product **3u** was isolated in 40% yield and with 56:44 er as a yellow oil.  $[\alpha]_D^{25} +1.8$  (*c* 0.76,  $CHCl_3$ ) for 56:44 er;  $^1H$  NMR (400 MHz, chloroform-*d*)  $\delta$  7.53 (d, *J* = 8.1 Hz, 2H), 7.43 (d, *J* = 8.1 Hz, 2H), 7.34 – 7.28 (m, 2H), 6.93 – 6.85 (m, 2H), 6.58 (d, *J* = 15.8 Hz, 1H), 6.39 (dd, *J* = 15.8, 8.7 Hz, 1H), 3.80 (s, 3H), 3.77 (d, *J* = 8.8 Hz, 1H), 3.71 (t, *J* = 4.7 Hz, 4H), 2.58 – 2.46 (m, 2H), 2.44 – 2.34 (m, 2H).  $^{13}C$  NMR (126 MHz, chloroform-*d*)  $\delta$  159.1, 140.3, 134.5, 133.4, 129.9, 129.3 (q, *J* = 32.6 Hz), 129.1, 126.6, 125.5 (q, *J* = 3.9 Hz), 124.2 (q, *J* = 272.4 Hz), 114.2, 74.0, 67.2, 55.3, 52.2.  $^{19}F$  NMR (376 MHz, chloroform-*d*)  $\delta$  -62.6. HRMS (ESI): [M-morpholine] $^{\oplus}$  calcd for  $C_{17}H_{14}F_3O^{\oplus}$  291.0991, found 291.0993. HPLC analysis: chiral (OD-H) + (OD-H) column (the two columns were connected to each other); detected at 254 nm, 25 °C; 2.0 % *i*PrOH in *n*-hexane; flow = 1.0 mL/min; Retention time: 15.9 min (minor), 16.6 min (major).

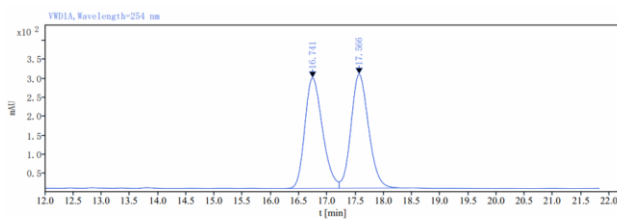

| Peak | Retention time/min | Area  |
|------|--------------------|-------|
| 1    | 16.741             | 49.33 |
| 2    | 17.566             | 50.67 |

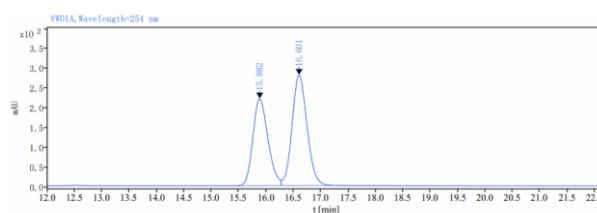

| Peak | Retention time/min | Area  |
|------|--------------------|-------|
| 1    | 15.882             | 44.16 |
| 2    | 16.601             | 55.84 |

## 5. Applications of C-C bond aminations

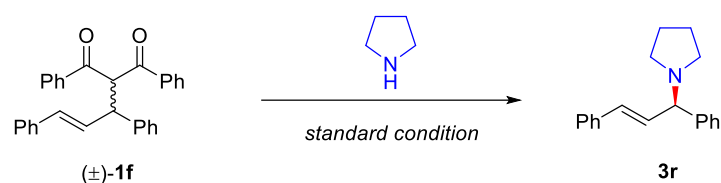

**(*R,E*)-1-(1,3-Diphenylallyl)pyrrolidine (3r)**. Known compound<sup>[12]</sup>. The procedure for this transformation was identical to that described above for the amination of allylic C–C bonds, except that THF (0.10 mL) as the solvent and Cs<sub>2</sub>CO<sub>3</sub> (1 equiv) as the base were used. The reaction was stirred at 0 °C for 12 h. Yellow oil, 70% yield, [ $\alpha$ ]<sub>D</sub><sup>25</sup> -0.80 (*c* 0.62, CHCl<sub>3</sub>) for 92:8 er; <sup>1</sup>H NMR (400 MHz, chloroform-*d*)  $\delta$  7.42 (d, *J* = 7.1 Hz, 2H), 7.39 – 7.15 (m, 8H), 6.56 (d, *J* = 15.8 Hz, 1H), 6.43 (dd, *J* = 15.8, 8.5 Hz, 1H), 3.77 (d, *J* = 8.5 Hz, 1H), 2.75 – 2.50 (m, 2H), 2.45 (m, 2H), 1.91 – 1.66 (m, 4H). <sup>13</sup>C NMR (126 MHz, chloroform-*d*)  $\delta$  143.0, 137.1, 133.0, 130.1, 128.63, 128.55, 127.8, 127.5, 127.2, 126.5, 74.5, 53.2, 23.4. HRMS (ESI): [M+H]<sup>+</sup> calcd for C<sub>19</sub>H<sub>22</sub>N<sup>+</sup> 264.1747, found 264.1749. HPLC analysis: chiral (OD-H) + (OD-H) column (the two columns were connected to each other); detected at 254 nm, 25 °C; 0.5% *i*PrOH in *n*-hexane; flow = 0.7 mL/min; Retention time: 18.0 min (major), 19.3 min (minor).

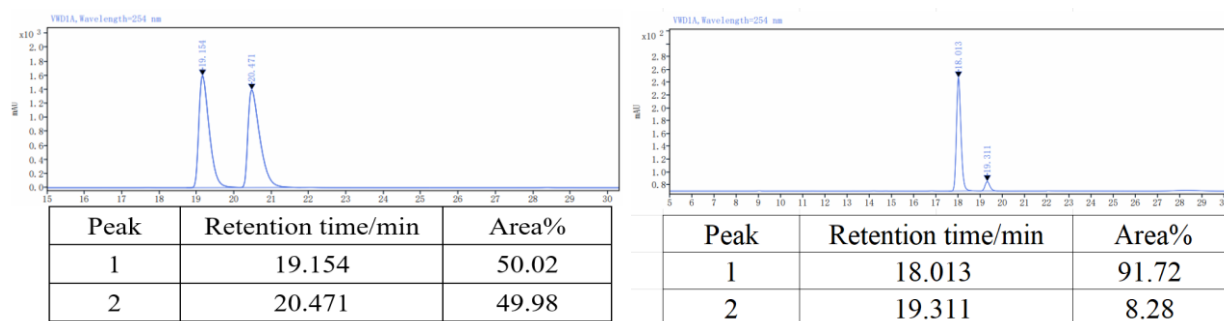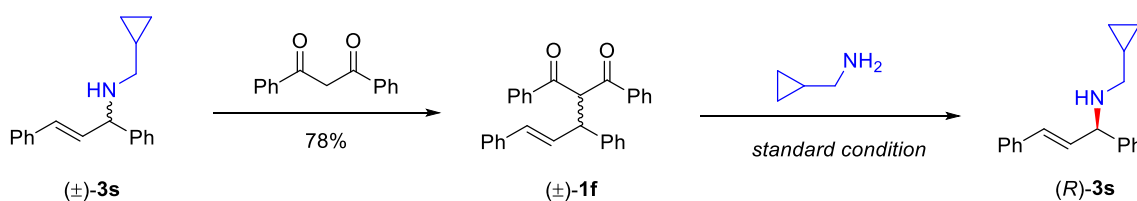

(±)-**1f**. In a nitrogen-filled glovebox, to a 4 mL vial with amine (±)-**3s** (0.10 mmol), [Pd(allyl)Cl]<sub>2</sub> (0.9 mg, 0.0025 mmol), dppf (3.3 mg, 0.0060 mmol) and Et<sub>3</sub>N (30 mg, 0.30 mmol) were added 1,3-diphenylpropane-1,3-dione (0.30 mmol) and dry CH<sub>3</sub>OH (0.40 mL). The resulting mixture was stirred at room temperature for 20 h. After this time, the reaction was concentrated and purified by flash column chromatography to afford the pure (±)-**1f** (33 mg) in 78% yield.

**(*R,E*)-*N*-(Cyclopropylmethyl)-1,3-diphenylprop-2-en-1-amine (3s).** The procedure for this transformation was identical to that described above for the amination of allylic C–C bonds, except that Cs<sub>2</sub>CO<sub>3</sub> (1 equiv) was used as the base and the reaction was stirred at 0 °C for 12 h. Yellow oil, 65% yield, [α]<sub>D</sub><sup>25</sup> +8.5 (c 0.73, CHCl<sub>3</sub>) for 93:7 er; <sup>1</sup>H NMR (400 MHz, chloroform-*d*) δ 7.49 – 7.09 (m, 10H), 6.56 (d, *J* = 15.8 Hz, 1H), 6.32 (dd, *J* = 15.8, 7.5 Hz, 1H), 4.40 (d, *J* = 7.5 Hz, 1H), 2.54 (dd, *J* = 12.1, 6.8 Hz, 1H), 2.37 (dd, *J* = 12.1, 6.8 Hz, 1H), 1.00 (m, 1H), 0.54 – 0.40 (m, 2H), 0.09 (m, 2H). <sup>13</sup>C NMR (126 MHz, chloroform-*d*) δ 143.0, 137.0, 132.8, 130.2, 128.7, 128.6, 127.5, 127.4, 127.3, 126.5, 65.6, 52.9, 11.4, 3.5. HRMS (ESI): [M+H]<sup>+</sup> calcd for C<sub>19</sub>H<sub>22</sub>N<sup>+</sup> 264.1747, found 264.1747. HPLC analysis: chiral OD-H column; detected at 254 nm, 25 °C; 2% *i*-PrOH in *n*-hexane; flow = 0.7 mL/min; Retention time: 7.5 min (minor), 8.5 min (major).

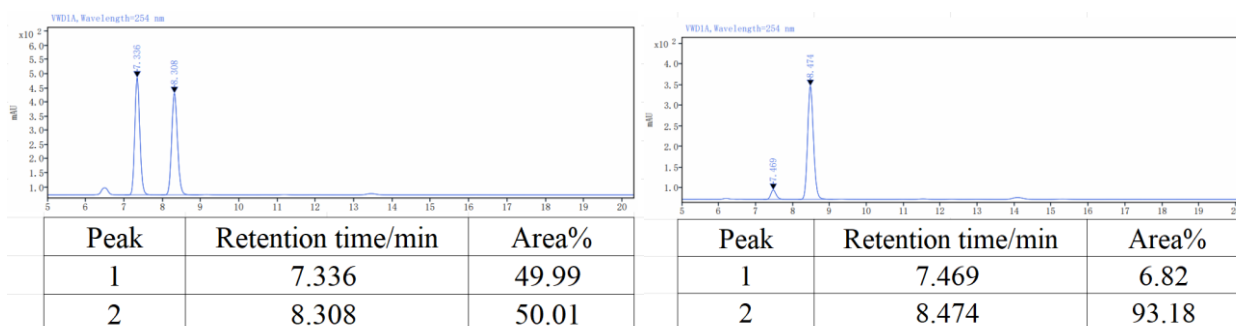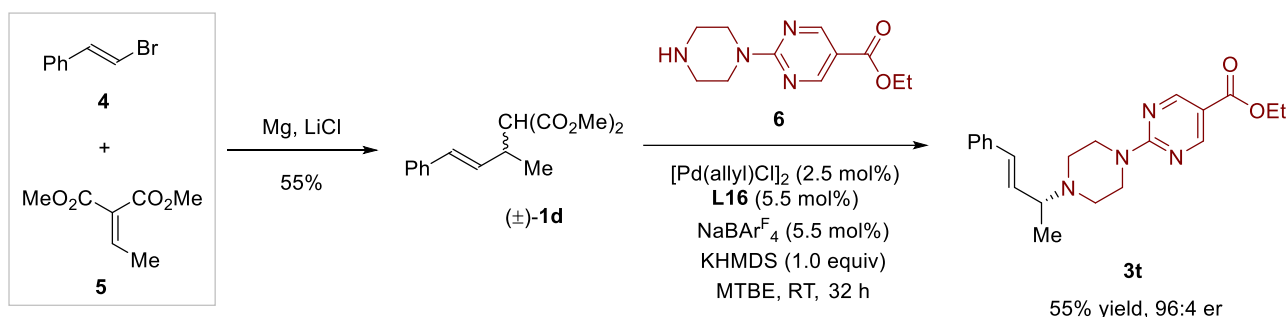

**Dimethyl (*E*)-2-(4-phenylbut-3-en-2-yl)malonate ((±)-1d):** To a dry 25 mL Schlenk tube with Mg (72 mg, 0.30 mmol) and LiCl (42 mg, 0.1 mmol) were added **4** (37 mg, 0.20 mmol) in THF (0.40 mL) at 0 °C under nitrogen. The mixture was stirred at 0 °C for 30 min and the solution gradually turned dark green. Then unsaturated ester **5** (16 mg, 0.10 mmol) in THF (0.20 mL) was added to the solution dropwise. The reaction continued to stir at 0 °C for 5 h. After this time, the reaction was quenched with EtOAc (5 mL) dropwise at 0 °C, diluted with water (5 mL), extracted by EtOAc (5 mL × 3), condensed and purified by preparative HPLC (IE column, *i*-PrOH:*n*-hexane = 20:80, 25 °C, 1.0 mL/min) to give racemic **1d** (14 mg) as a colorless oil in 55% yield.

**Ethyl (*E*)-2-(4-(4-phenylbut-3-en-2-yl)piperazin-1-yl)pyrimidine-5-carboxylate (**3t**).** In a nitrogen-filled glovebox, to a 4 mL vial with [Pd(allyl)Cl]<sub>2</sub> (0.9 mg, 0.0025 mmol), **L16** (3.0 mg, 0.0055 mmol), sodium tetrakis[3,5-bis(trifluoromethyl)phenyl]borate (NaBArF<sub>4</sub>, 4.9 mg, 0.0055 mmol), alkene **1d** (52 mg, 0.20 mmol), amine nucleophile **6** (0.10 mmol) and KHMDS (20 mg, 0.10 mmol) was added dry MTBE (0.20 mL). The resulting mixture was stirred at room temperature for 32 h. After this time, the reaction was concentrated and purified by flash column chromatography to afford the pure product **3t** as a white solid (21 mg) in 55% yield. [ $\alpha$ ]<sub>D</sub><sup>25</sup> +74.8 (c 0.93, CHCl<sub>3</sub>) for 96:4 er. <sup>1</sup>H NMR (500 MHz, chloroform-*d*)  $\delta$  8.82 (s, 2H), 7.39 – 7.35 (m, 2H), 7.31 (dd, *J* = 8.5, 6.8 Hz, 2H), 7.25 – 7.21 (m, 1H), 6.47 (d, *J* = 15.9 Hz, 1H), 6.20 (dd, *J* = 15.9, 8.0 Hz, 1H), 4.32 (q, *J* = 7.1 Hz, 2H), 3.95 (t, *J* = 5.2 Hz, 4H), 3.15 (p, *J* = 6.8 Hz, 1H), 2.64 (m, 4H), 1.35 (t, *J* = 7.1 Hz, 3H), 1.30 (d, *J* = 6.8 Hz, 3H). <sup>13</sup>C NMR (126 MHz, chloroform-*d*)  $\delta$  165.0, 162.1, 159.8, 136.9, 131.7, 131.4, 128.7, 127.6, 126.4, 112.5, 62.6, 60.6, 49.8, 44.2, 17.8, 14.4. HRMS (EI): [*M*]<sup>+</sup> calcd for C<sub>21</sub>H<sub>26</sub>N<sub>4</sub>O<sub>2</sub><sup>+</sup> 366.2050, found 366.2055. HPLC analysis: Chiracel IE column; detected at 254 nm, 40 °C; 20% *i*PrOH in *n*-hexane; flow = 1.0 mL/min; Retention time: 17.6 min (major), 19.5 min (minor).

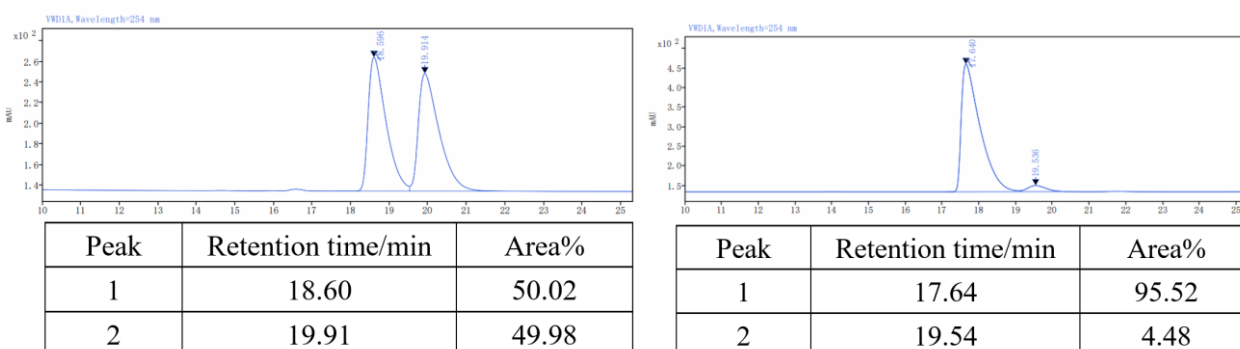

## 6. Mechanistic studies

### 6.1 Comparison of initial rates

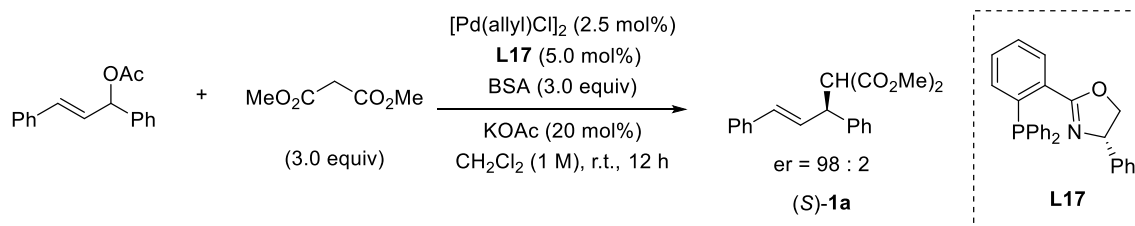

Preparation of (*S*)-**1a**: to a 25 mL flask under nitrogen with [Pd(allyl)Cl]<sub>2</sub> (18 mg, 0.050 mmol), **L17** (41 mg, 0.10 mmol), allyl electrophile (2.0 mmol), BSA (1.2 g, 6.0 mmol) and KOAc (39 mg, 0.40 mmol) were added dimethyl malonate (6.0 mmol) and dry CH<sub>2</sub>Cl<sub>2</sub> (2 mL). The resulting

mixture was stirred at room temperature for 12 h. After this time, the reaction was quenched with saturated NH<sub>4</sub>Cl aqueous solution (10 mL) and water (40 mL), extracted with EtOAc (40 mL × 3). The combined organic phase was dried over anhydrous sodium sulfate, filtered, concentrated and purified by flash column chromatography to provide pure compound (*S*)-**1a** in 98% yield (0.64 g) and 98:2 er.

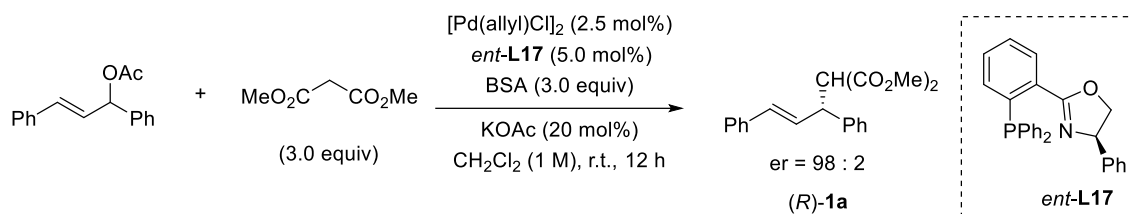

Preparation of (*R*)-**1a**: the procedure was the same to that described for the synthesis of (*S*)-**1a**, except that *ent*-**L17** was used.

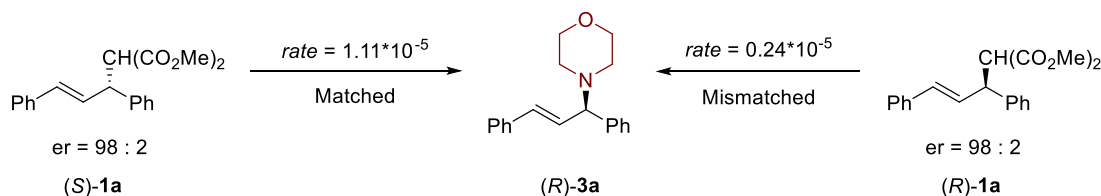

In a nitrogen-filled glovebox, to a 4 mL vial were added [Pd(allyl)Cl]<sub>2</sub> (0.9 mg, 0.0025 mmol), ligand **L11** (4.8 mg, 0.0055 mmol), and sodium tetrakis[3,5-bis(trifluoromethyl)phenyl]borate (NaBAr<sup>F</sup><sub>4</sub>, 4.9 mg, 0.0055 mmol), (*S*)-**1a** or (*R*)-**1a** (0.1 mmol), KO<sup>t</sup>Bu (11 mg, 0.10 mmol) and dry PhC<sub>2</sub>H<sub>5</sub> (0.2 mL). The mixture was stirred at room temperature for 1 min. Then, dodecane (25 μL, 18 mg, 0.11 mmol) and morpholine **2a** (0.30 mmol) were added to the solution. The resulting mixture was stirred at room temperature and analyzed by GC. The GC samples were prepared by taking an aliquot of the reaction mixture with syringe and filtered over a short pad of silica with DCM as eluent at the indicated time points.





condensed and analyzed by crude  $^1\text{H}$  NMR. The yield of recovered **1a** was determined to be 44%. The enantioselectivity of recovered **1a** was further determined by HPLC analysis as 55:45 er.

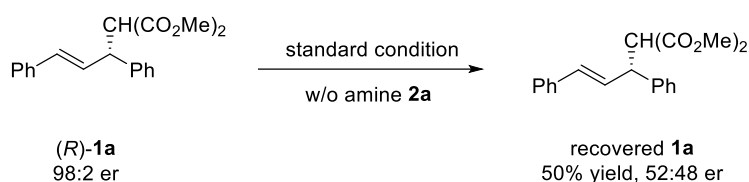

In a nitrogen-filled glovebox, to a 4 mL vial with  $[\text{Pd}(\text{allyl})\text{Cl}]_2$  (0.9 mg, 0.0025 mmol), ligand **L11** (4.4 mg, 0.0050 mmol) and sodium tetrakis[3,5-bis(trifluoromethyl)phenyl]borate ( $\text{NaBAR}^{\text{F}_4}$ , 4.9 mg, 0.0055 mmol) were added  $(R)\text{-1a}$  (0.1 mmol),  $\text{KO}^t\text{Bu}$  (11 mg, 0.10 mmol) and dry  $\text{PhC}_2\text{H}_5$  (0.20 mL). The mixture was stirred at room temperature for 24 h. After this time, the reaction was condensed and analyzed by crude  $^1\text{H}$  NMR. The yield of recovered **1a** was determined to be 50%. The enantioselectivity of recovered **1a** was further determined by HPLC analysis as 52:48 er.

Note: for both cases above, the other side products mainly come from the homocoupling, decarboxylation and ester exchange with *tert*-butoxide, which lead to the consumption of starting substrate **1a**.

### 6.3 Reaction profile of asymmetric C–C bond amination

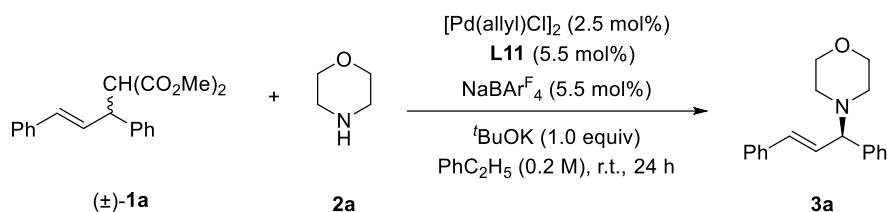

In a nitrogen-filled glovebox, to a 4 mL vial were added  $[\text{Pd}(\text{allyl})\text{Cl}]_2$  (2.7 mg, 0.0075 mmol), ligand **L11** (14 mg, 0.0165 mmol), and sodium tetrakis[3,5-bis(trifluoromethyl)phenyl]borate ( $\text{NaBAR}^{\text{F}_4}$ , 15 mg, 0.0165 mmol), *rac*-**1a** (0.30 mmol),  $\text{KO}^t\text{Bu}$  (34 mg, 0.30 mmol) and dry  $\text{PhC}_2\text{H}_5$  (0.60 mL). The mixture was stirred at room temperature for 1 min. Then, dodecane (25  $\mu\text{L}$ , 18 mg, 0.11 mmol) and nucleophile **2a** (0.90 mmol) were added to the solution. The resulting mixture was stirred at room temperature and analyzed by GC. The GC samples were prepared by removing an aliquot of the reaction mixture by syringe and filtered over a short pad of silica with DCM as eluent at the indicated time points. The enantioselectivity of recovered **1a** and corresponding product **3a** isolated from the reaction mixture for GC sample was determined by HPLC analysis.

| Entry | t/min | Yield of <b>3a</b> | ee of <b>3a</b> | ee of <b>1a</b> | Yield of <b>1a</b> |
|-------|-------|--------------------|-----------------|-----------------|--------------------|
| 1     | 38    | 12%                | 90              | 16              | 62%                |
| 2     | 90    | 17%                | 90              | 28              | 52%                |
| 3     | 157   | 27%                | 90              | 52              | 42%                |
| 4     | 252   | 37%                | 90              | 78              | 33%                |
| 5     | 318   | 43%                | 90              | 87              | 29%                |
| 6     | 378   | 46%                | 90              | 92              | 26%                |
| 7     | 456   | 49%                | 90              | 93              | 23%                |
| 8     | 531   | 52%                | 90              | 94              | 21%                |
| 9     | 644   | 54%                | 90              | 94              | 18%                |
| 10    | 708   | 56%                | 90              | 94              | 16%                |
| 11    | 839   | 60%                | 90              | 94              | 13%                |
| 12    | 1447  | 69%                | 88              | --              | 5%                 |

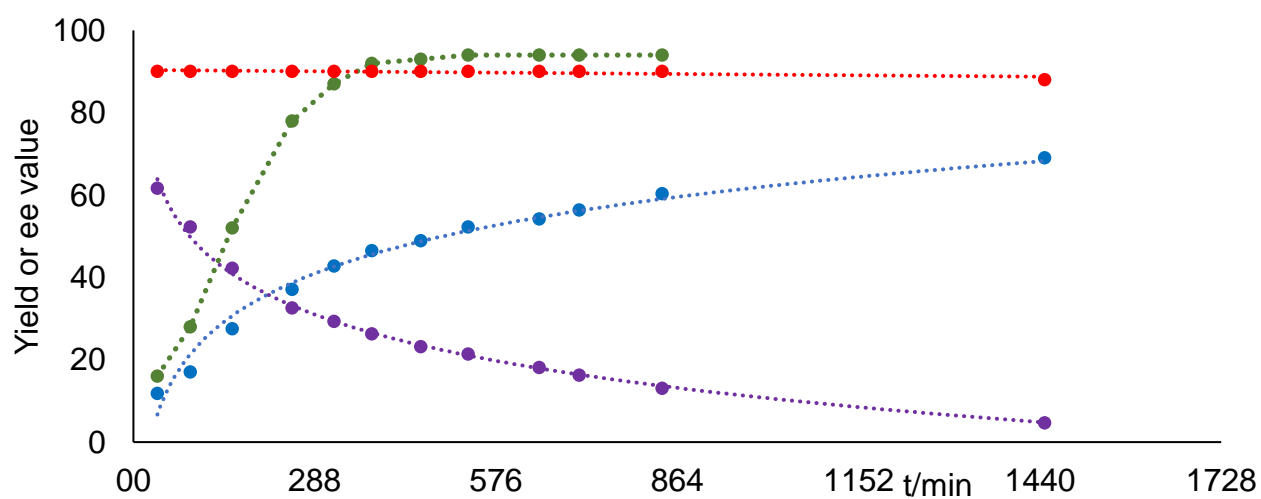

## 6.4 Nonlinear relationship experiments

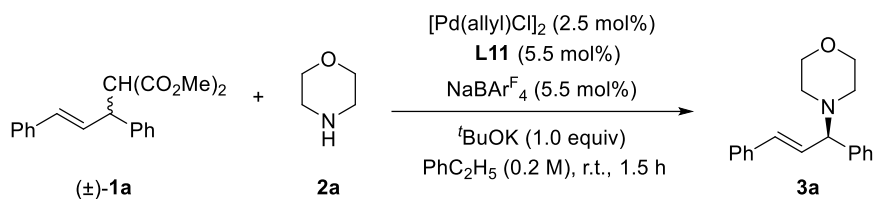

| Entry | ee of <b>L11</b> | ee of <b>3a</b> |
|-------|------------------|-----------------|
| 1     | 100              | 90              |
| 2     | 80               | 70              |
| 3     | 60               | 47              |
| 4     | 40               | 30              |
| 5     | 20               | 16              |
| 6     | 0                | 0               |

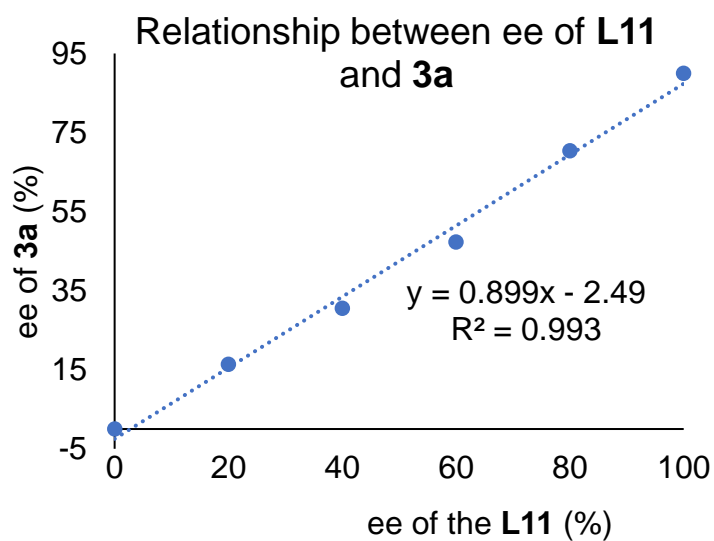

## 6.5 Kinetic order of nucleophile **2a**

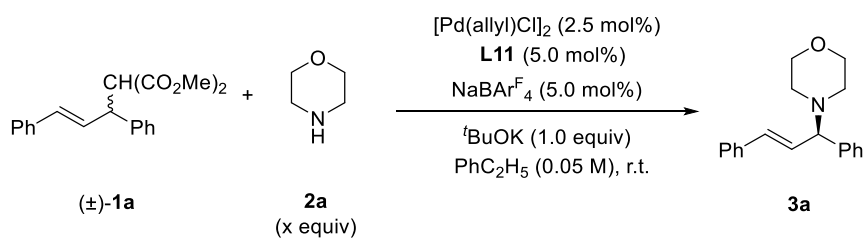

To a 25 mL Schlenk tube in a N<sub>2</sub> box was added [Pd(allyl)Cl]<sub>2</sub>, **L11**, sodium tetrakis[3,5-bis(trifluoromethyl)phenyl]borate (NaBAR<sup>F</sup><sub>4</sub>), **1a** and <sup>t</sup>BuOK. Then dry PhEt was added and the mixture was then stirred at 25 °C for 3 min. Next, dodecane was added sequentially. After the mixture was stirred for 1 min, nucleophile **2a** was added to the reaction. The reaction was stirred at 25 °C and analyzed by GC along time. The detailed amount of each substrate was shown in the table below.

| Entry | Pd  | <b>L11</b> | <sup>t</sup> BuOK | NaBAR <sup>F</sup> <sub>4</sub> | PhEt | <b>1a</b> | <b>2a</b> |      |                         | Dodecane |
|-------|-----|------------|-------------------|---------------------------------|------|-----------|-----------|------|-------------------------|----------|
|       | mg  | mg         | mg                | mg                              | mL   | mg        | mg        | mmol | c / mol*L <sup>-1</sup> | mg       |
| 1     | 0.9 | 4.3        | 28.0              | 4.4                             | 5    | 81.0      | 22.0      | 0.25 | 0.05                    | 18.8     |
| 2     | 0.9 | 4.3        | 28.0              | 4.4                             | 5    | 81.0      | 44.0      | 0.50 | 0.1                     | 18.8     |
| 3     | 0.9 | 4.3        | 28.0              | 4.4                             | 5    | 81.0      | 66.0      | 0.75 | 0.15                    | 18.8     |
| 4     | 0.9 | 4.3        | 28.0              | 4.4                             | 5    | 81.0      | 88.0      | 1.00 | 0.20                    | 18.8     |

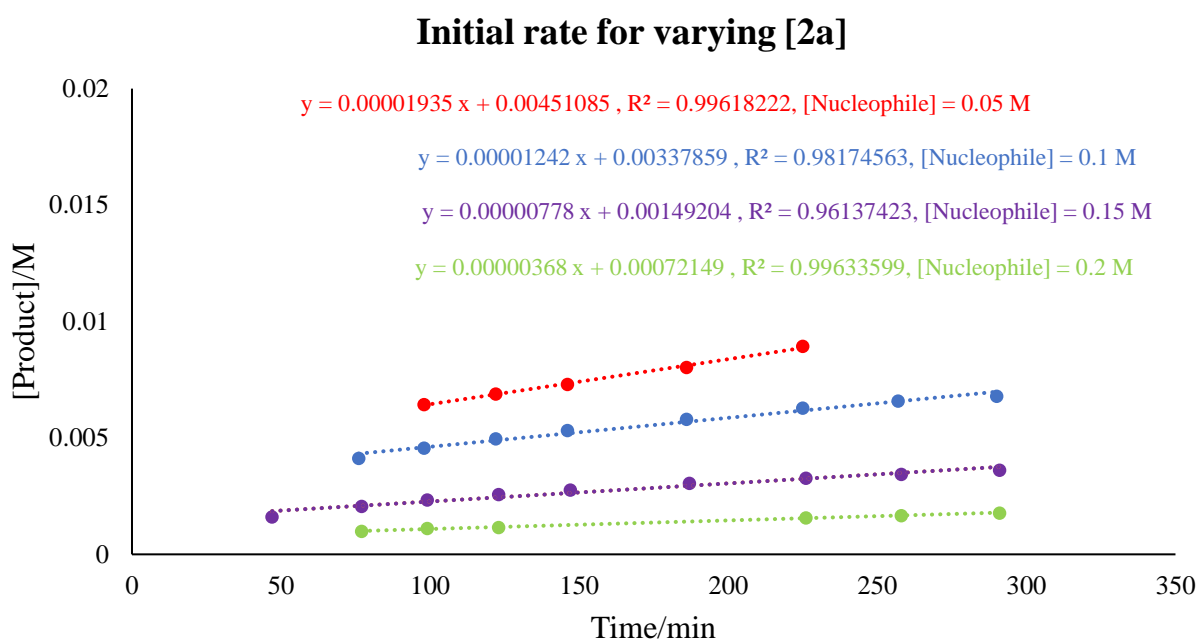

**Fig. 1** Plot of concentration of **3a** over time with reactions performed with varying concentration of **2a**

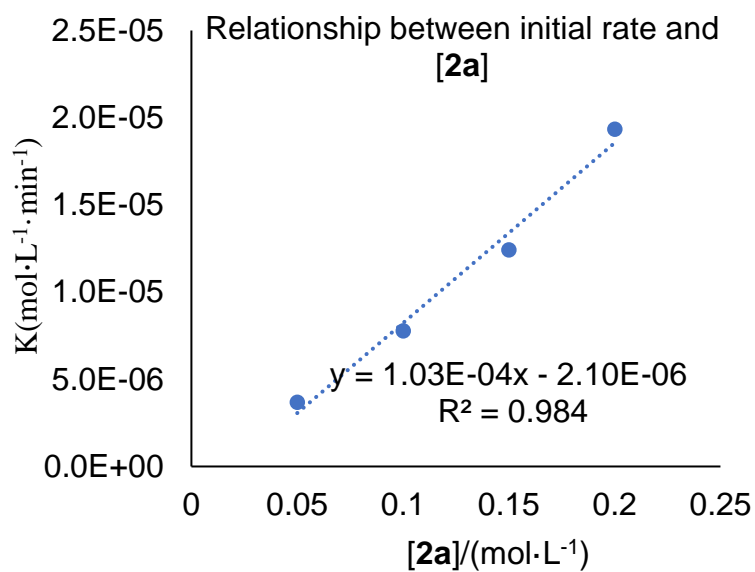

**Fig. 2.** Plot of the initial rates of formation of **3a** vs. **[2a]** for the C-C bond amination.

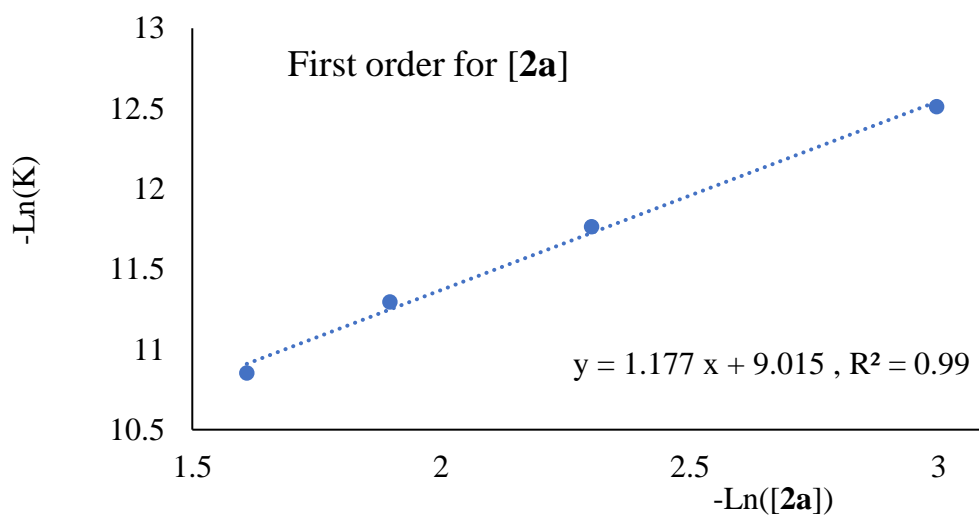

**Fig. 3** Plot of  $\ln(\text{Initial Rates})$  vs.  $\ln(\mathbf{2a})$  for the substitution reaction.

## 6.6 Kinetic order of catalyst

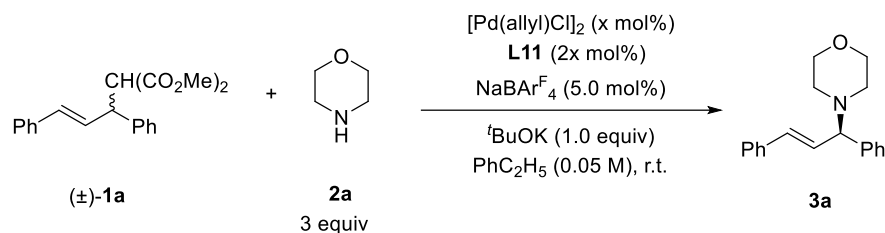

To a 25 mL Schlenk tube in a  $\text{N}_2$  box was added  $[\text{Pd}(\text{allyl})\text{Cl}]_2$ , **L11**, sodium tetrakis[3,5-bis(trifluoromethyl)phenyl]borate ( $\text{NaBAR}^{\text{F}}_4$ ), **1a** and  $t\text{BuOK}$ . Then dry PhEt was added and the mixture was then stirred at 25 °C for 3 min. Next, dodecane was added sequentially. After the mixture was stirred for 1 min, nucleophile **2a** was added to the reaction. The reaction was stirred at 25 °C and analyzed by GC along time. The detailed amount of each substrate was shown in the table below.

| Entry | Pd          |     | <b>L11</b> |      | $\text{NaBAR}^{\text{F}}_4$ |      | $t\text{BuOK}$ | PhEt | <b>1a</b> | <b>2a</b> | Dodecane |
|-------|-------------|-----|------------|------|-----------------------------|------|----------------|------|-----------|-----------|----------|
|       | mmol        | mg  | mmol       | mg   | mmol                        | mg   | mg             | mL   | mg        | mg        | mg       |
| 1     | 0.0025      | 0.9 | 0.005      | 4.3  | 0.005                       | 4.4  | 28.0           | 5    | 81.0      | 22.0      | 18.8     |
| 2     | 0.0037<br>5 | 1.4 | 0.0075     | 6.5  | 0.0075                      | 6.5  | 28.0           | 5    | 81.0      | 22.0      | 18.8     |
| 3     | 0.0050      | 1.8 | 0.010      | 8.7  | 0.010                       | 8.7  | 28.0           | 5    | 81.0      | 22.0      | 18.8     |
| 4     | 0.0062<br>5 | 2.3 | 0.0125     | 10.8 | 0.0125                      | 10.8 | 28.0           | 5    | 81.0      | 22.0      | 18.8     |

### Initial rate of [cat.]

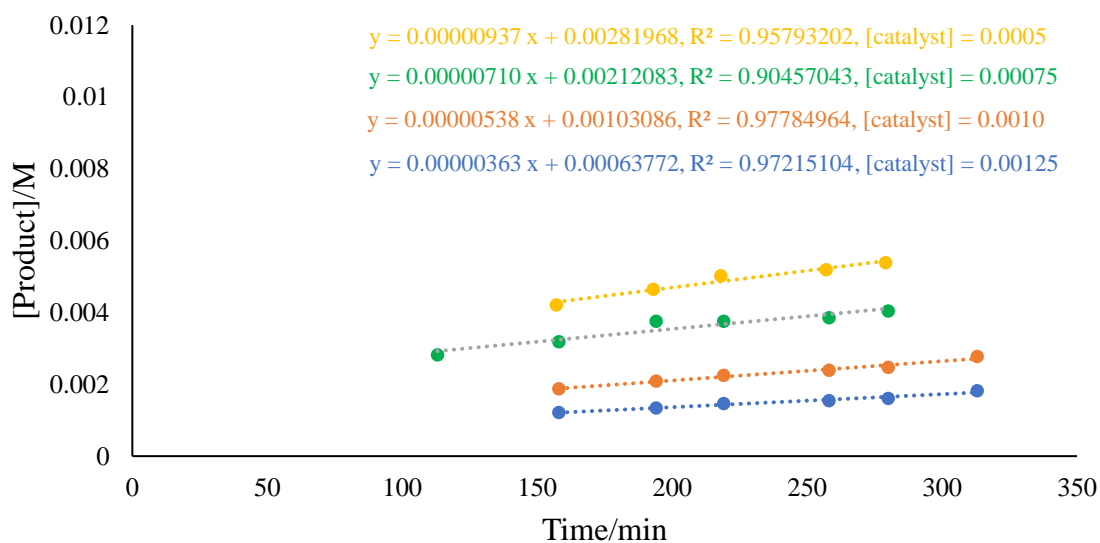

**Fig. 4** Plot of concentration of **3a** over time with reactions performed with varying concentration of catalyst.

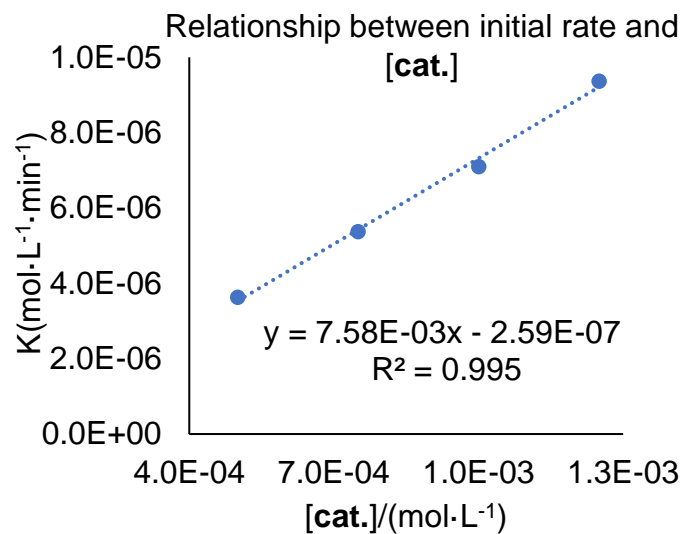

**Fig. 5.** Plot of the initial rates of formation of **3a** vs. [cat.] for the C-C bond amination.

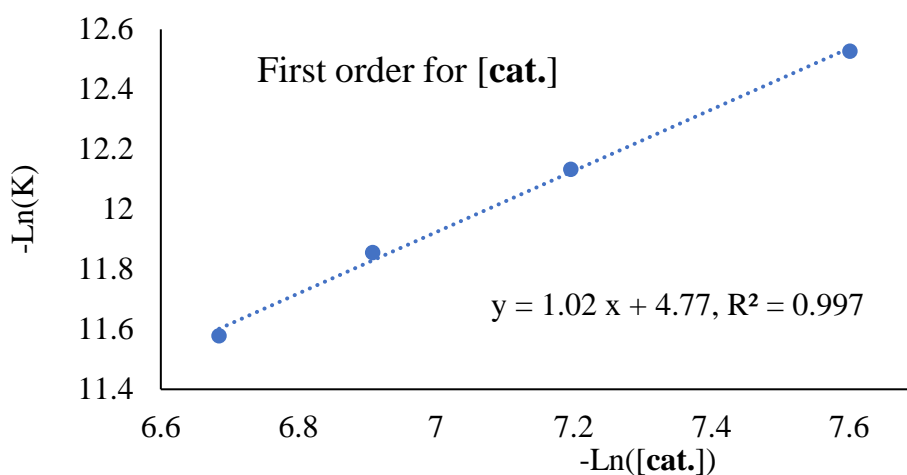

**Fig. 6** Plot of  $\ln(\text{Initial Rates})$  vs.  $\ln(\text{catalyst})$  for the substitution reaction.

### 6.7 Kinetic studies on **1a**

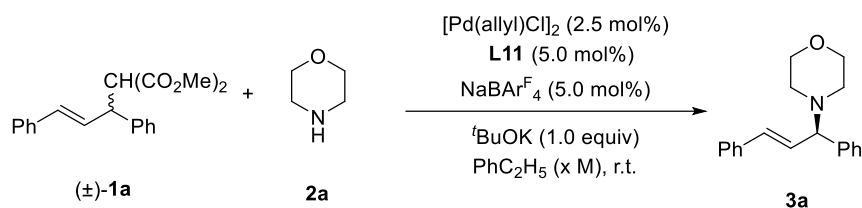

To a 25 mL Schlenk tube in a N<sub>2</sub> box was added [Pd(allyl)Cl]<sub>2</sub>, **L11**, sodium tetrakis[3,5-bis(trifluoromethyl)phenyl]borate (NaBAR<sup>F</sup><sub>4</sub>), **1a** and <sup>t</sup>BuOK. Then dry PhEt was added and the mixture was then stirred at 25 °C for 3 min. Next, dodecane was added sequentially. After the mixture was stirred for 1 min, nucleophile **2a** was added to the reaction. The reaction was stirred at 25 °C and analyzed by GC along time. The detailed amount of each substrate was shown in the table below.

| Entry | Pd  | <b>L4</b> | <sup>t</sup> BuOK | NaBAR <sup>F</sup> <sub>4</sub> | PhEt | <b>1a</b> |       |                         | <b>2a</b> | Dodecane |
|-------|-----|-----------|-------------------|---------------------------------|------|-----------|-------|-------------------------|-----------|----------|
|       | mg  | mg        | mg                | mg                              | mL   | mg        | mmol  | c / mol*L <sup>-1</sup> | mg        | mg       |
| 1     | 2.3 | 10.8      | 28.0              | 11.1                            | 5    | 81.0      | 0.25  | 0.05                    | 22.0      | 18.8     |
| 2     | 2.3 | 10.8      | 28.0              | 11.1                            | 5    | 121.6     | 0.375 | 0.075                   | 22.0      | 18.8     |
| 3     | 2.3 | 10.8      | 28.0              | 11.1                            | 5    | 162.1     | 0.500 | 0.10                    | 22.0      | 18.8     |
| 4     | 2.3 | 10.8      | 28.0              | 11.1                            | 5    | 202.6     | 0.625 | 0.125                   | 22.0      | 18.8     |

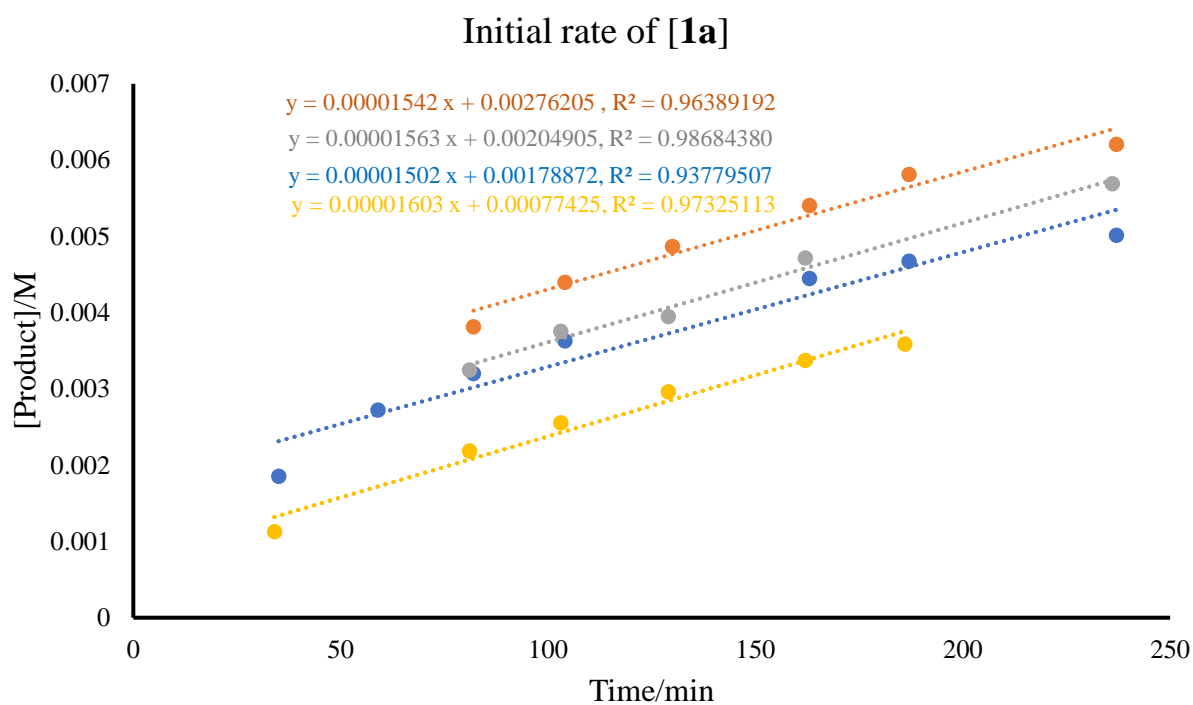

**Fig. 7** Plot of concentration of **3a** over time with reactions performed with varying concentration of **1a**.



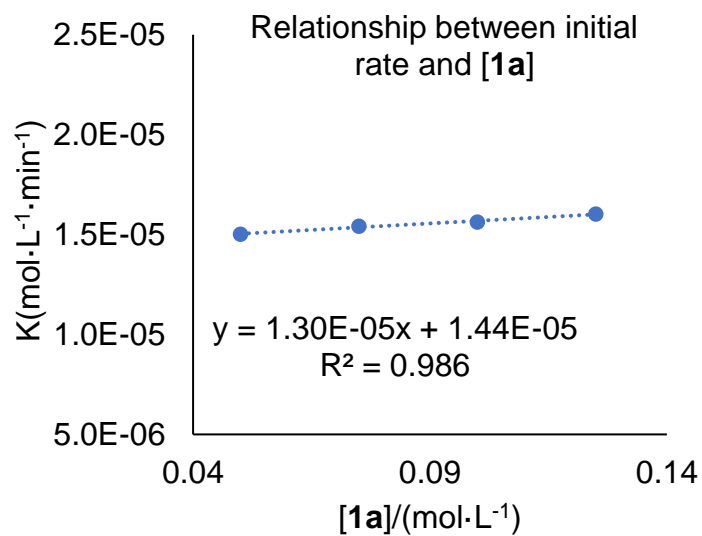

**Fig. 8.** Plot of the initial rates of formation of **3a** vs. **[1a]** for the C-C bond amination.

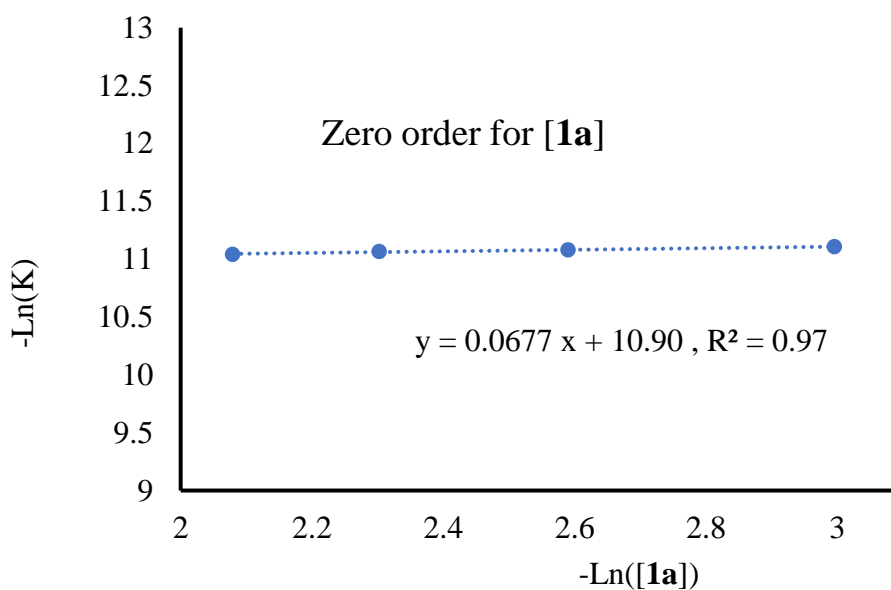

**Fig. 9** Plot of  $\ln(\text{Initial Rates})$  vs.  $\ln(\mathbf{1a})$  for the substitution reaction.

### 6.8 Kinetic order of <sup>t</sup>BuOK

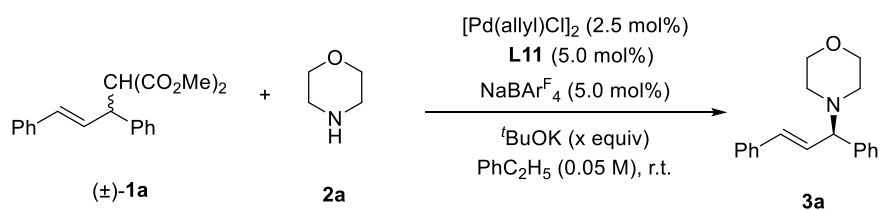

To a 25 mL Schlenk tube in a N<sub>2</sub> box was added [Pd(allyl)Cl]<sub>2</sub>, **L11**, sodium tetrakis[3,5-bis(trifluoromethyl)phenyl]borate (NaBAR<sup>F</sup><sub>4</sub>), **1a** and <sup>t</sup>BuOK. Then dry PhEt was added and the mixture was then stirred at 25 °C for 3 min. Next, dodecane was added sequentially. After the mixture was stirred for 1 min, nucleophile **2a** was added to the reaction. The reaction was stirred at 25 °C and analyzed by GC along time. The detailed amount of each substrate was shown in the table below.

| Entry | Pd  | <b>L11</b> | <sup>t</sup> BuOK |        |                         | NaBAR <sup>F</sup> <sub>4</sub> | PhEt | <b>1a</b> | <b>2a</b> | Dodecane |
|-------|-----|------------|-------------------|--------|-------------------------|---------------------------------|------|-----------|-----------|----------|
|       | mg  | mg         | mg                | mmol   | c / mol*L <sup>-1</sup> | mg                              | mL   | mg        | mg        | mg       |
| 1     | 2.3 | 10.8       | 7.0               | 0.0625 | 0.0125                  | 11.1                            | 5    | 81.0      | 22.0      | 18.8     |
| 2     | 2.3 | 10.8       | 14.0              | 0.125  | 0.025                   | 11.1                            | 5    | 81.0      | 22.0      | 18.8     |
| 3     | 2.3 | 10.8       | 28.0              | 0.1875 | 0.0375                  | 11.1                            | 5    | 81.0      | 22.0      | 18.8     |
| 4     | 2.3 | 10.8       | 28.0              | 0.25   | 0.05                    | 11.1                            | 5    | 81.0      | 22.0      | 18.8     |

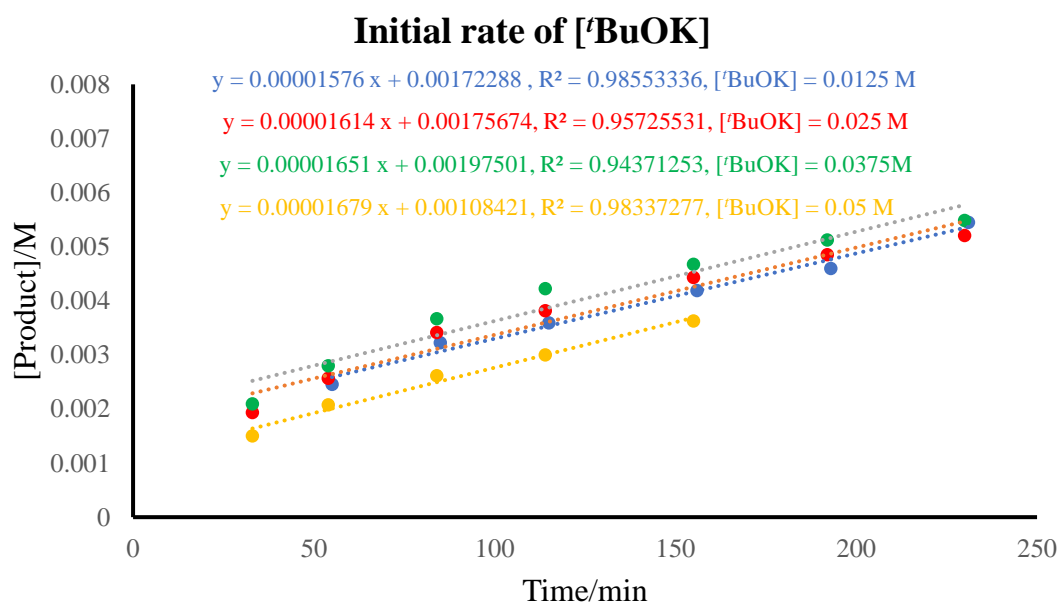

**Fig. 10.** Plot of concentration of **3a** over time with reactions performed with varying concentration of <sup>t</sup>BuOK

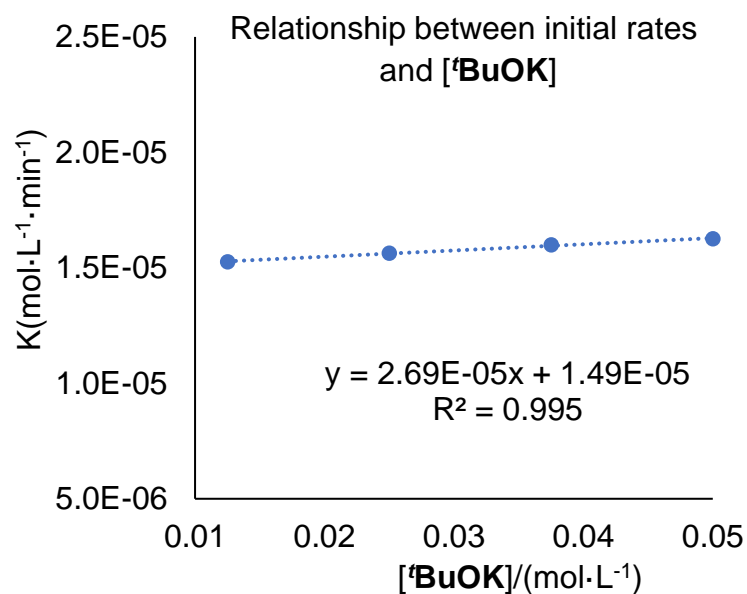

**Fig. 11.** Plot of the initial rates of formation of **3a** vs. [tBuOK] for the C-C bond amination.

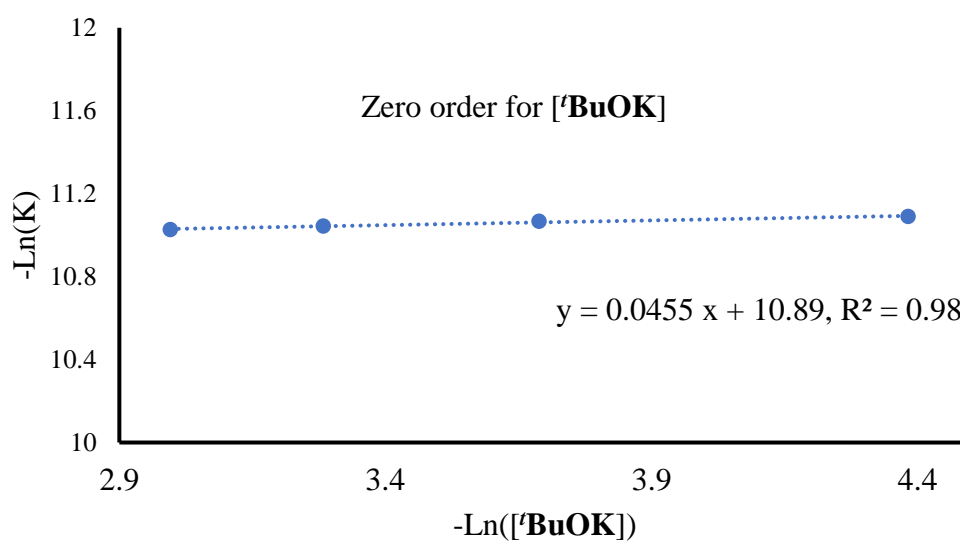

**Fig. 12.** Plot of  $\ln(\text{Initial Rates})$  vs.  $\ln(\text{tBuOK})$  for the substitution reaction.

## 6.9 Hammett curve

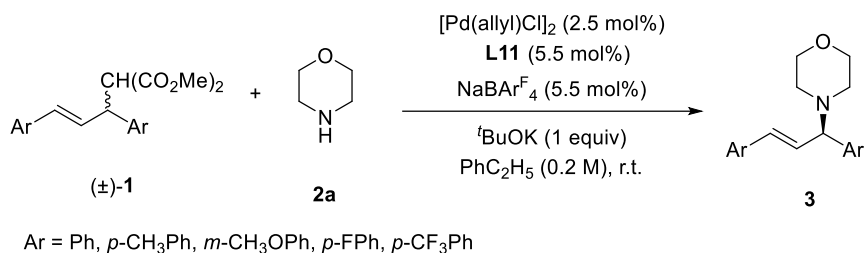

To a 25 mL Schlenk tube under N<sub>2</sub> was added [Pd(allyl)Cl]<sub>2</sub> (0.9 mg, 0.0025 mmol), **L11** (4.8 mg, 0.0055 mmol), sodium tetrakis[3,5-bis(trifluoromethyl)phenyl]borate (NaBAR<sub>4</sub><sup>F</sup>) (4.9 mg, 0.0055 mmol), different electrophile (0.1 mmol) and <sup>t</sup>BuOK (11.2 mg, 0.1 mmol). Then dry PhEt (0.5 mL) was added to the reaction and the resulting mixture was stirred at 25 °C for 3 min. Next, dodecane (18 mg, 0.11 mmol) was added to the solution. After the mixture was stirred for 1 min, morpholine **2a** (26 mg, 0.30 mmol) was added to the reaction. The mixture continued to stir at room temperature and the reaction was analyzed by GC along time.

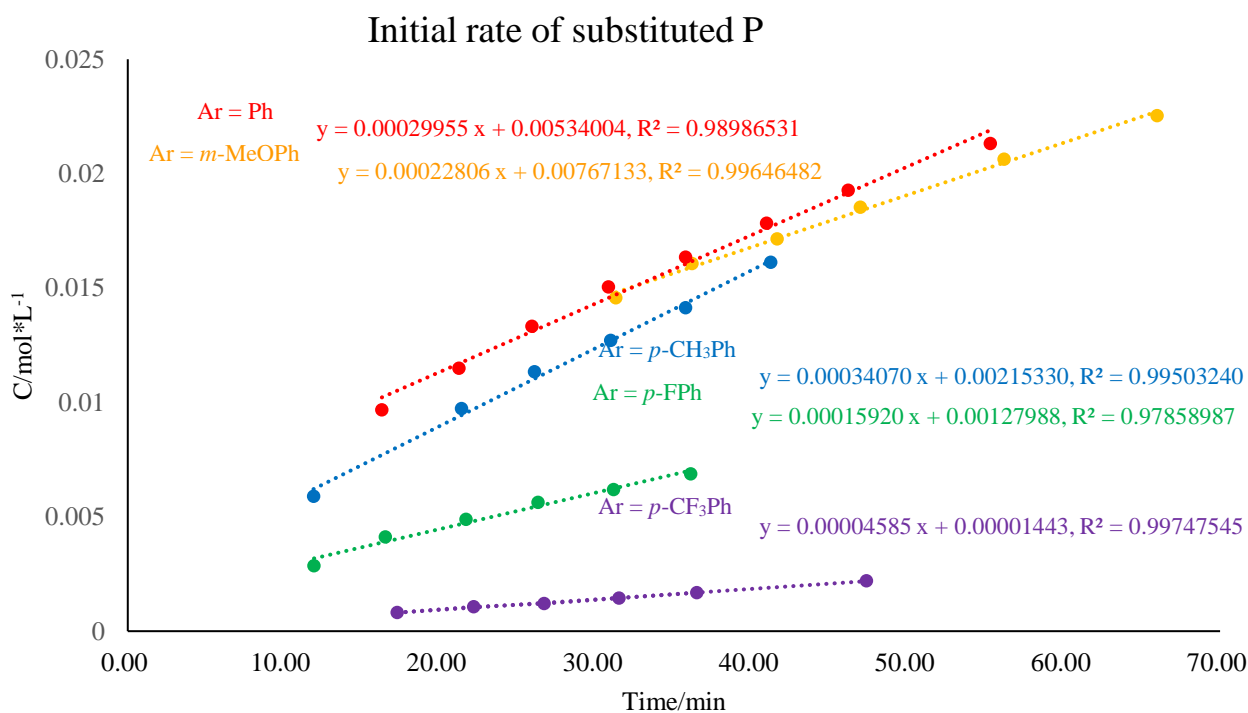

**Fig. 13** Plot of [product] vs. time for the substitution reaction.

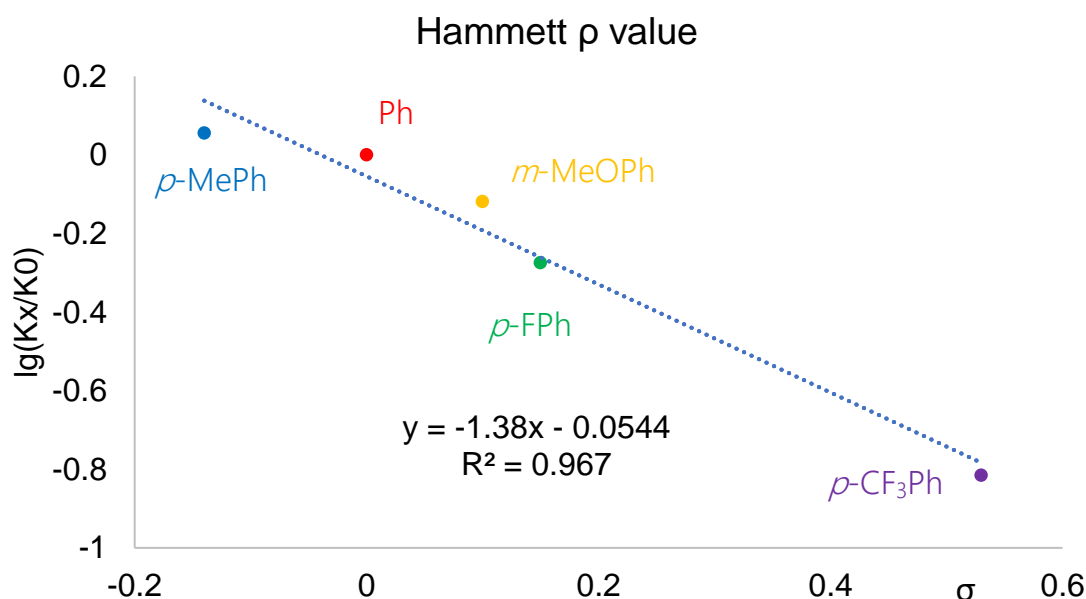

**Fig. 14** Plot of  $\lg(K_x/K_0)$  vs.  $\sigma$  for the substitution reaction.

## 6.10 Solubility test

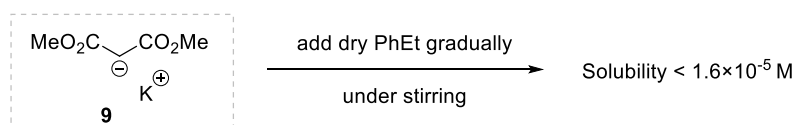

To a 50 mL dry flask under nitrogen was added  $\text{KHCH}(\text{CO}_2\text{Me})_2$  **9** (1.1 mg, 0.0065 mmol). Next, dry PhEt (5 mL) was added to the flask and the resulting mixture was stirred at 25 °C for 10 min. If the solid could not fully dissolve in the solvent, then repeat this process. Finally, we found that after PhEt (40 mL) was added into the flask, the solid still did not fully dissolve in the solvent. Thus, the solubility of  $\text{KHCH}(\text{CO}_2\text{Me})_2$  in PhEt is roughly determined to be less than  $1.6 \times 10^{-5}$  M.

## 6.11 Detection of malonate potassium salt

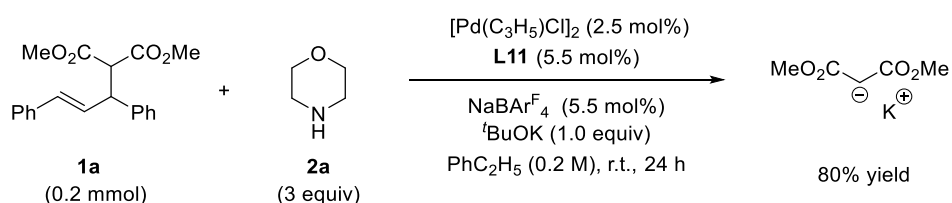

In a nitrogen-filled glovebox, to a 4 mL vial were added  $[\text{Pd}(\text{allyl})\text{Cl}]_2$  (1.8 mg, 0.005 mmol), **L11** (9.6 mg, 0.011 mmol), sodium tetrakis[3,5-bis(trifluoromethyl)phenyl]borate ( $\text{NaBAR}^{\text{F}_4}$ , 9.8 mg, 0.011 mmol), racemic alkene **1a** (0.20 mmol),  $t\text{BuOK}$  (22.4 mg, 0.20 mmol) and dry  $\text{Et}_3\text{N}$  (0.40 mL).

Then the reaction was stirred at room temperature for 1 min. Next, amine nucleophile **2a** (0.60 mmol) was added to the reaction and the resulting mixture was stirred at room temperature for 24 h. After this time, the reaction was transferred to a centrifuge tube under nitrogen and washed by dry *n*-hexane (5 mL). The centrifuge tube was centrifugal separated in centrifuge. Then the supernate was removed from the tube and the precipitate was washed by THF (5 mL × 3). Finally, the solid was dried by vacuum to give the malonate potassium salt as a white solid in 80% yield (27.2 mg).

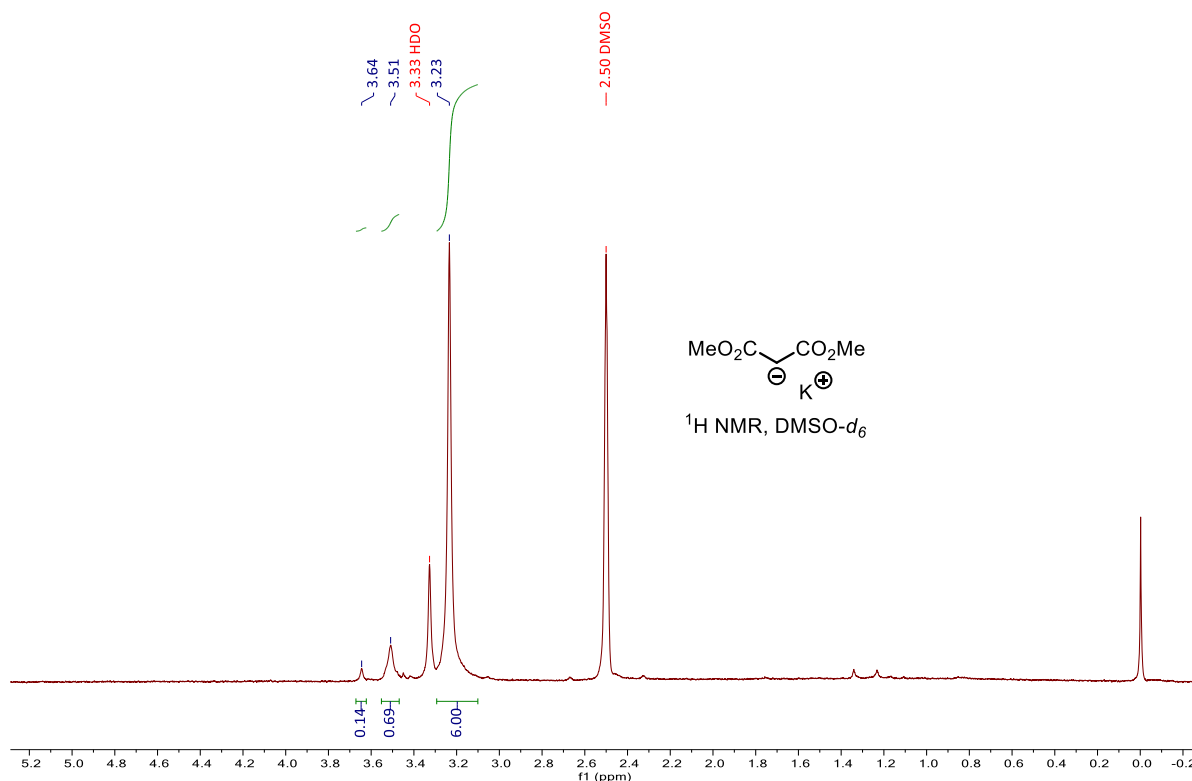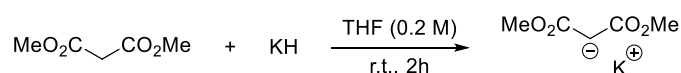

In a nitrogen-filled glovebox, to a 25 mL dry flask were added  $\text{CH}_2(\text{CO}_2\text{Me})_2$  (33 mg, 2.5 mmol) and dry THF (12.5 mL). Then KH (80 mg, 2.0 mmol) was added slowly to the reaction. Then the mixture was stirred at room temperature for 2 h. After this time, the reaction was transferred to a centrifuge tube under nitrogen and washed by dry THF (5 mL). The centrifuge tube was centrifugal separated in centrifuge. Then the supernate was removed from the tube and the precipitate was washed by THF (5 mL × 3). Finally, the solid was dried by vacuum to give the malonate potassium salt as a white solid in 88% yield (298 mg). The corresponding  $^1\text{H NMR}$  was shown as below, which was same to that prepared from **1a** described above.

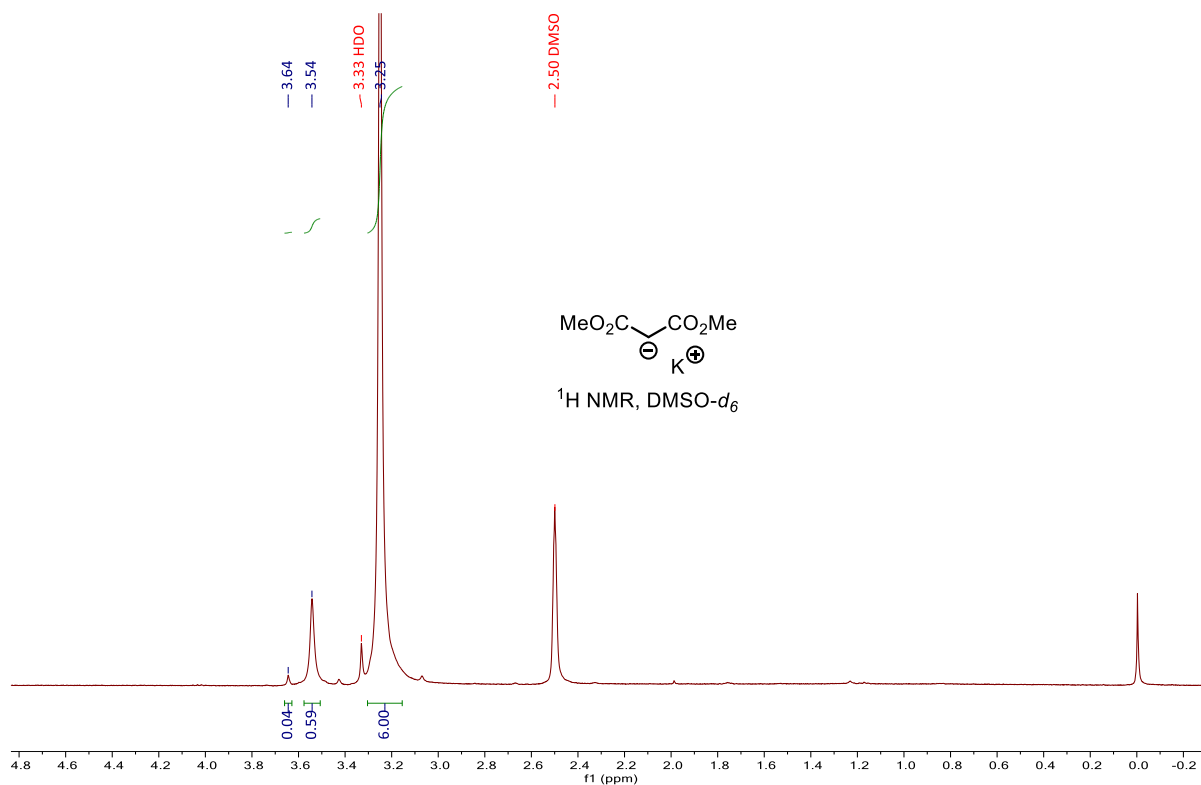

## 6.12 Detection of C-C cleavage species

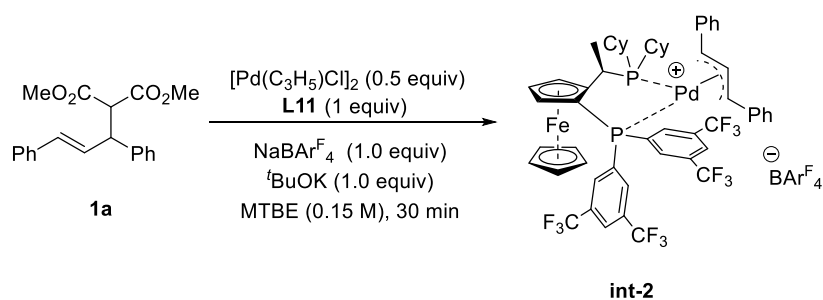

In a nitrogen-filled glovebox, to a 4 mL vial were added alkene **1a** (0.03 mmol), [Pd(allyl)Cl]<sub>2</sub> (5.5 mg, 0.015 mmol), **L11** (26 mg, 0.030 mmol), sodium tetrakis[3,5-bis(trifluoromethyl)phenyl]borate (NaBARF<sub>4</sub>, 27 mg, 0.030 mmol), <sup>t</sup>BuOK (3.4 mg, 0.030 mmol) and dry MTBE (0.20 mL). Then the resulting mixture was stirred at room temperature for 30 min. After this time, the solvent was removed by vacuum to provide the complex **int-2** which was detected by <sup>31</sup>P NMR (PPh<sub>3</sub> as the internal standard and CDCl<sub>3</sub> as the solvent as shown below). The structure of this complex was also confirmed by other method to prepare it as shown below.

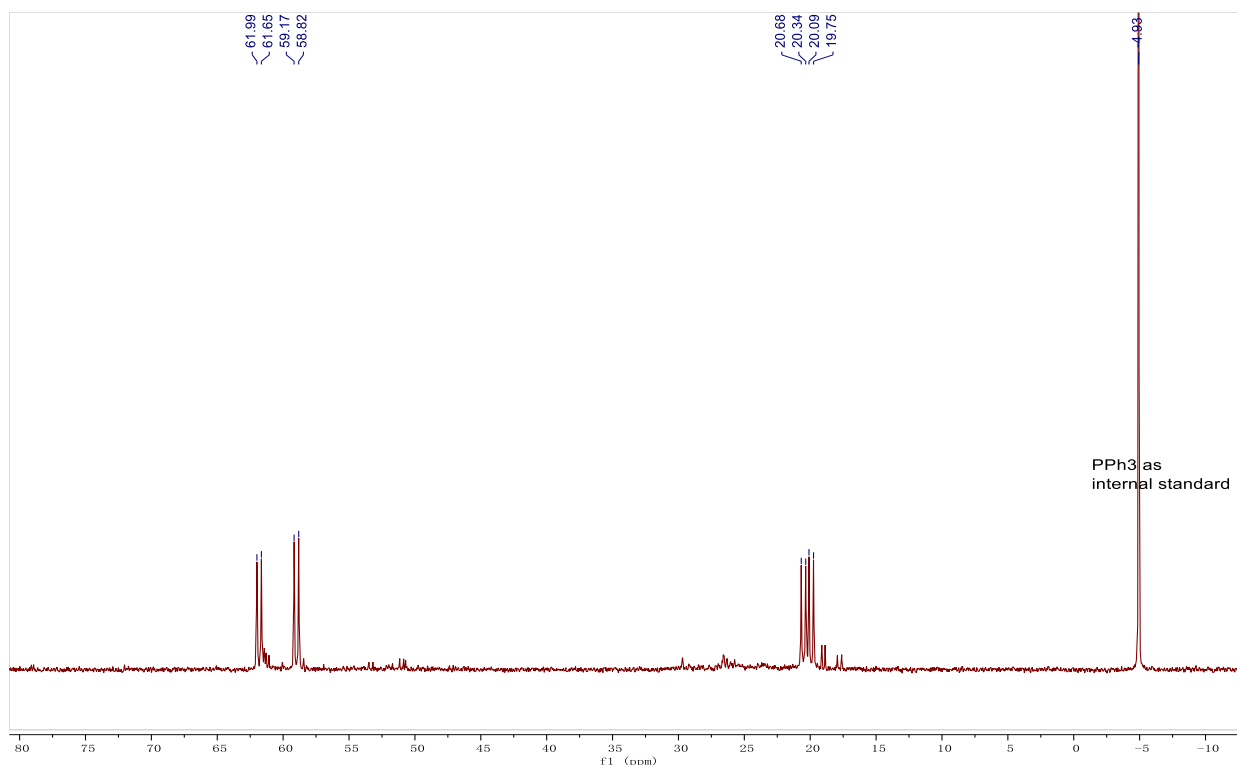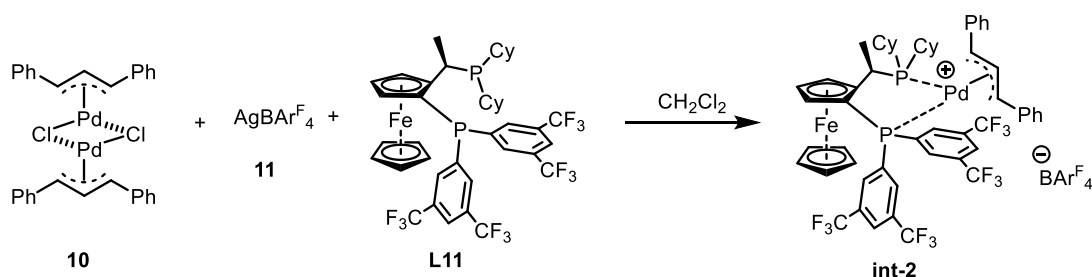

The direct preparation of **int-2** was based on a reported work<sup>[13]</sup>. In a nitrogen-filled glovebox, to a 25 mL flask were added palladium catalyst **10** (33 mg, 0.050 mmol), **L11** (87 mg, 0.10 mmol), silver tetrakis[3,5-bis(trifluoromethyl)phenyl]borate ( $\text{AgBARF}_4$ , 0.11 g, 0.11 mmol) and dry  $\text{CH}_2\text{Cl}_2$  (2.0 mL). Then the resulting mixture was stirred at room temperature for 30 min. After this time, the flask was removed from the glovebox, filtered through a pad of celite (rinsing with  $\text{CH}_2\text{Cl}_2$ ), and concentrated in vacuo to afford **int-2** as an orange solid in 96% yield as a mixture of *exo* and *endo* complexes (*ca.* 1:1 mixture)<sup>[14]</sup>. The corresponding spectra were complicated due to the mixture of isomers and peak overlapping.  $^1\text{H}$  NMR (500 MHz, chloroform-*d*)  $\delta$  8.33 (s, 1H), 8.31 (s, 2H), 8.14 (s, 1H), 8.06 (s, 2H), 8.04 (s, 1H), 7.88 (s, 1H), 7.73 – 7.68 (m, 18H), 7.53 – 7.48 (m, 12H), 7.44 – 7.40 (m, 3H), 7.38 – 7.30 (m, 4H), 7.08 (t,  $J = 7.8$  Hz, 2H), 7.01 (d,  $J = 10.8$  Hz, 2H), 6.97 (t,  $J = 7.6$  Hz, 2H), 6.80 (t,  $J = 7.6$  Hz, 2H), 6.63 (d,  $J = 7.5$  Hz, 2H), 6.56 – 6.49 (m, 3H), 6.15 – 6.07 (m, 1H), 5.21 – 5.14 (m, 1H), 5.05 (t,  $J = 12.1$  Hz, 1H), 4.91 (t,  $J = 11.8$  Hz, 1H), 4.74 (s, 1H), 4.70 (s, 1H), 4.53 (t,  $J = 2.7$  Hz, 1H), 4.45 (t,  $J = 2.7$  Hz, 1H), 3.98 (s, 1H), 3.80 (s, 5H), 3.75 – 3.65 (m, 6H), 2.96



- 2.86 (m, 1H), 2.84 - 2.74 (m, 1H), 2.53 - 2.39 (m, 1H), 2.00 - 1.92 (m, 2H), 1.87 - 1.58 (m, 22H), 1.52 - 0.86 (m, 25H).  $^{13}\text{C}$  NMR (126 MHz, chloroform-*d*)  $\delta$  162.3, 161.9, 161.5, 161.1, 136.2, 135.4, 135.3, 135.1, 134.8, 134.24, 134.21, 134.20, 134.17, 133.5, 133.4, 133.3, 133.24, 133.22, 133.13, 133.06, 133.0, 132.9, 132.7, 132.66, 132.60, 132.5, 132.4, 132.3, 132.22, 132.19, 131.0, 130.5, 130.3, 130.1, 130.0, 129.9, 129.8, 129.4, 129.3, 129.0, 128.9, 128.79, 128.77, 128.74, 128.49, 128.46, 127.9, 127.0, 126.6, 125.7, 125.1, 124.8, 124.6, 123.5, 123.46, 123.40, 123.3, 121.4, 121.3, 121.2, 119.1, 117.4, 111.4, 110.2, 96.8, 94.1, 92.3, 92.1, 89.0, 88.8, 84.0, 83.8, 75.1, 74.6, 73.3, 72.9, 71.3, 71.2, 70.9, 70.8, 70.4, 70.3, 58.5, 36.8, 36.7, 35.5, 35.3, 34.0, 33.9, 32.5, 32.14, 32.08, 32.0, 31.9, 31.8, 31.6, 31.3, 31.25, 31.19, 31.15, 30.7, 30.6, 30.0, 29.4, 29.1, 27.9, 27.4, 27.3, 27.2, 26.93, 26.85, 26.8, 26.6, 26.5, 26.0, 25.9, 25.8, 25.6, 25.4, 25.3, 17.0, 16.9, 16.7, 16.6.  $^{19}\text{F}$  NMR (376 MHz,  $\text{CDCl}_3$ )  $\delta$  -62.52, -63.06, -63.19, -63.27, -63.36.  $^{31}\text{P}$  NMR (202 MHz,  $\text{CDCl}_3$ )  $\delta$  61.84 (d,  $J = 68.6$  Hz), 59.01 (d,  $J = 70.9$  Hz), 20.52 (d,  $J = 68.7$  Hz), 19.93 (d,  $J = 70.3$  Hz). HRMS (ESI):  $[\text{M} - \text{BAr}^{\text{F}_4}]^{\oplus}$  calcd for  $\text{C}_{55}\text{H}_{53}\text{F}_{12}\text{FeP}_2\text{Pd}^{\oplus}$  1165.1810, found 1165.1826.

The corresponding  $^{31}\text{P}$  NMR ( $\text{PPh}_3$  as the internal standard and  $\text{CDCl}_3$  as the solvent) was shown as below:

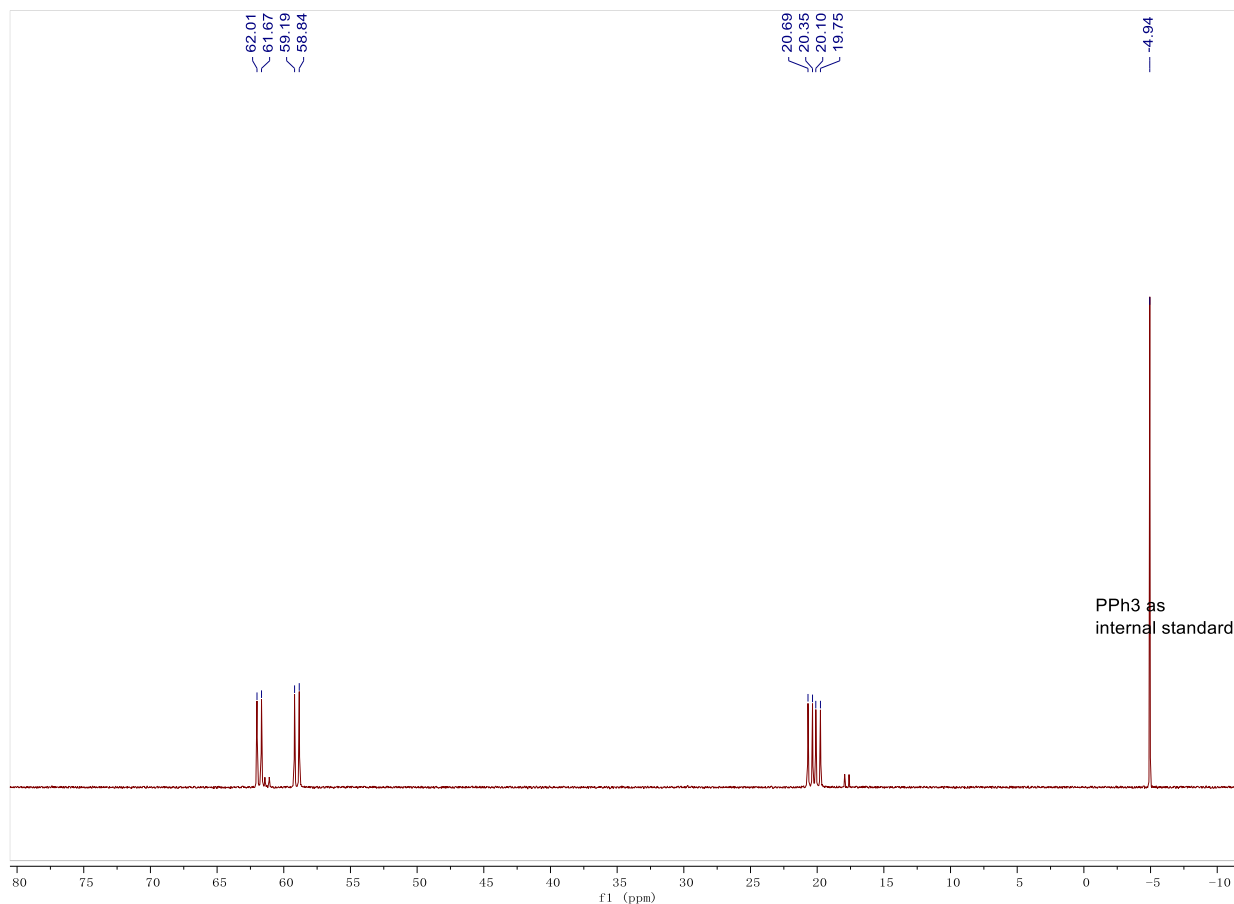

The effect of the prepared complex **int-2** was evaluated as shown below:

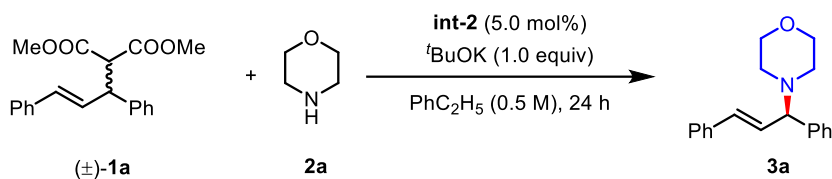

In a nitrogen-filled glovebox, to a 4 mL vial with alkene **1a** (0.10 mmol),  $\text{KO}^t\text{Bu}$  (11 mg, 0.10 mmol), **int-2** and dry PhEt (0.20 mL) sequentially. Then the reaction was stirred at room temperature for 1 min. Next, amine nucleophile **2a** (0.30 mmol) was added to the reaction and the resulting mixture was stirred at room temperature for 24 h. After this time, the reaction was concentrated and purified by flash column chromatography to afford the pure product **3a** as a yellow oil (22 mg) in 78% yield and with 94:6 er. The results are comparable to that using separate Pd catalyst and chiral ligand **L11** under standard conditions.

**7. Copies of  $^1\text{H}$  NMR,  $^{13}\text{C}$  NMR,  $^{19}\text{F}$  NMR, and  $^{31}\text{P}$  NMR spectra**

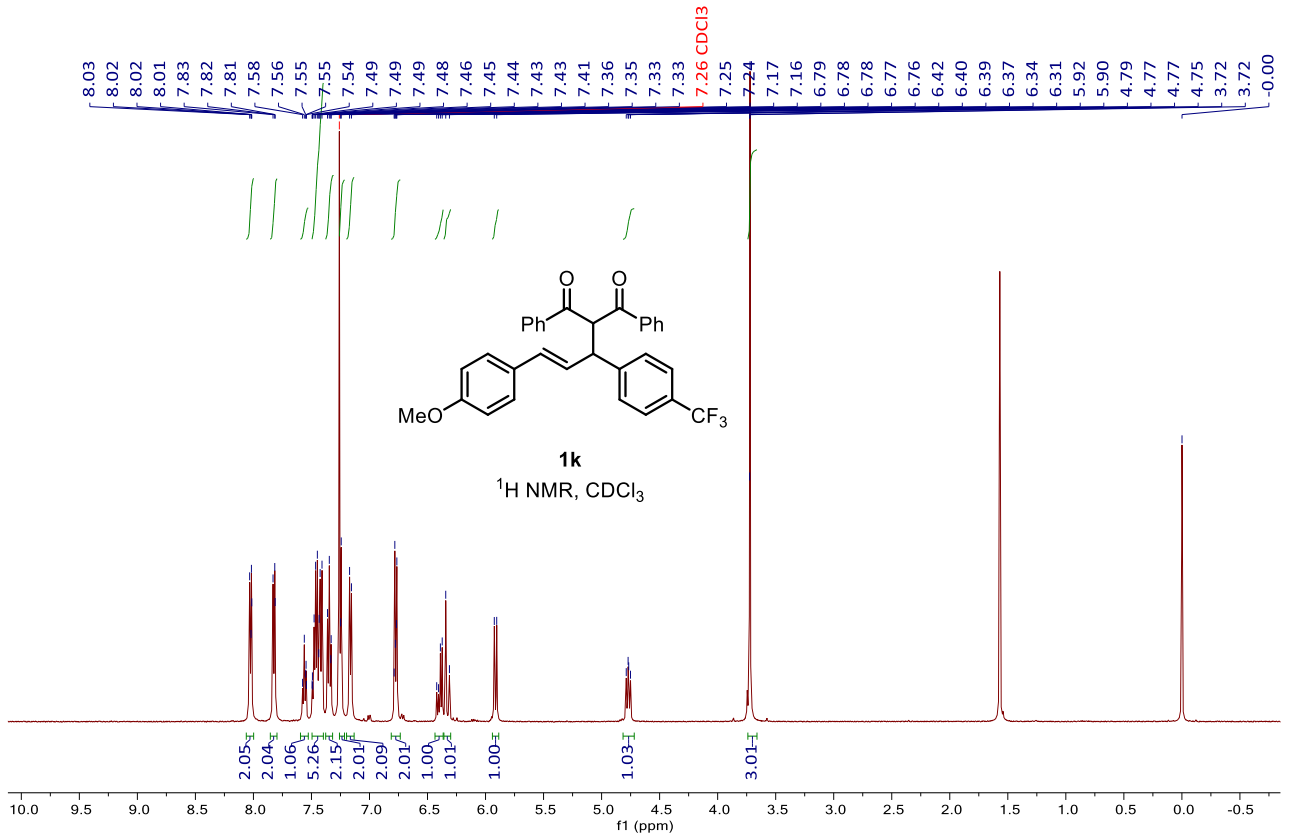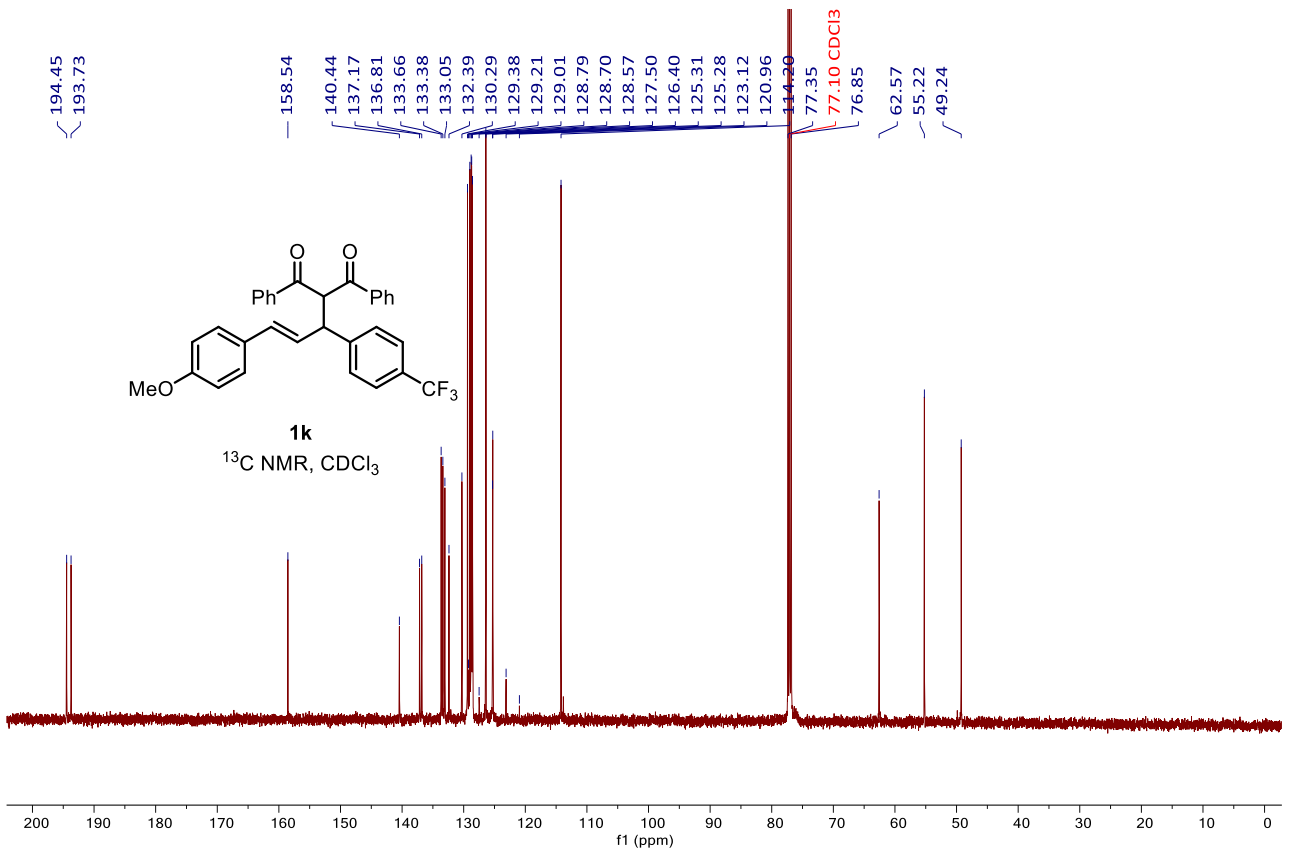

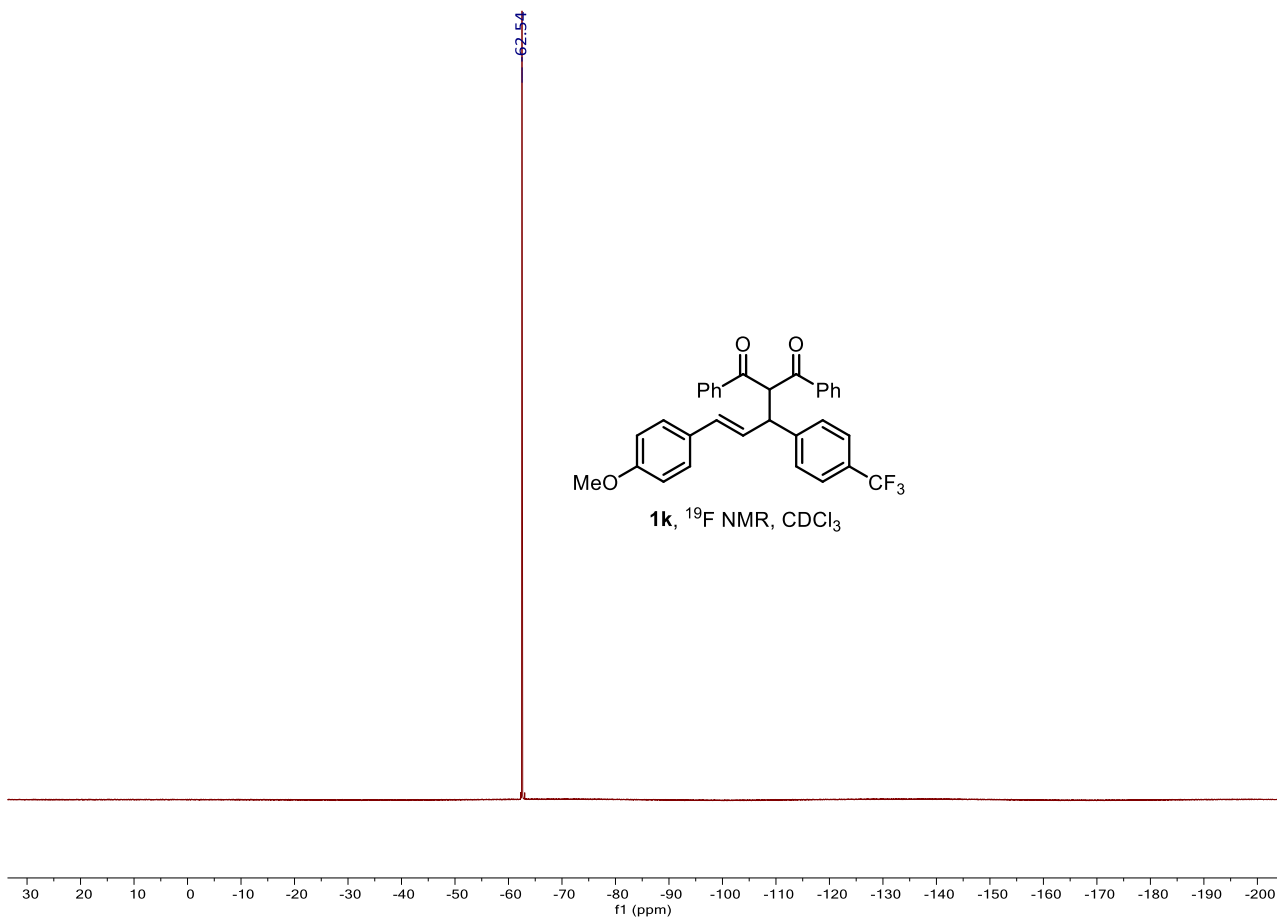

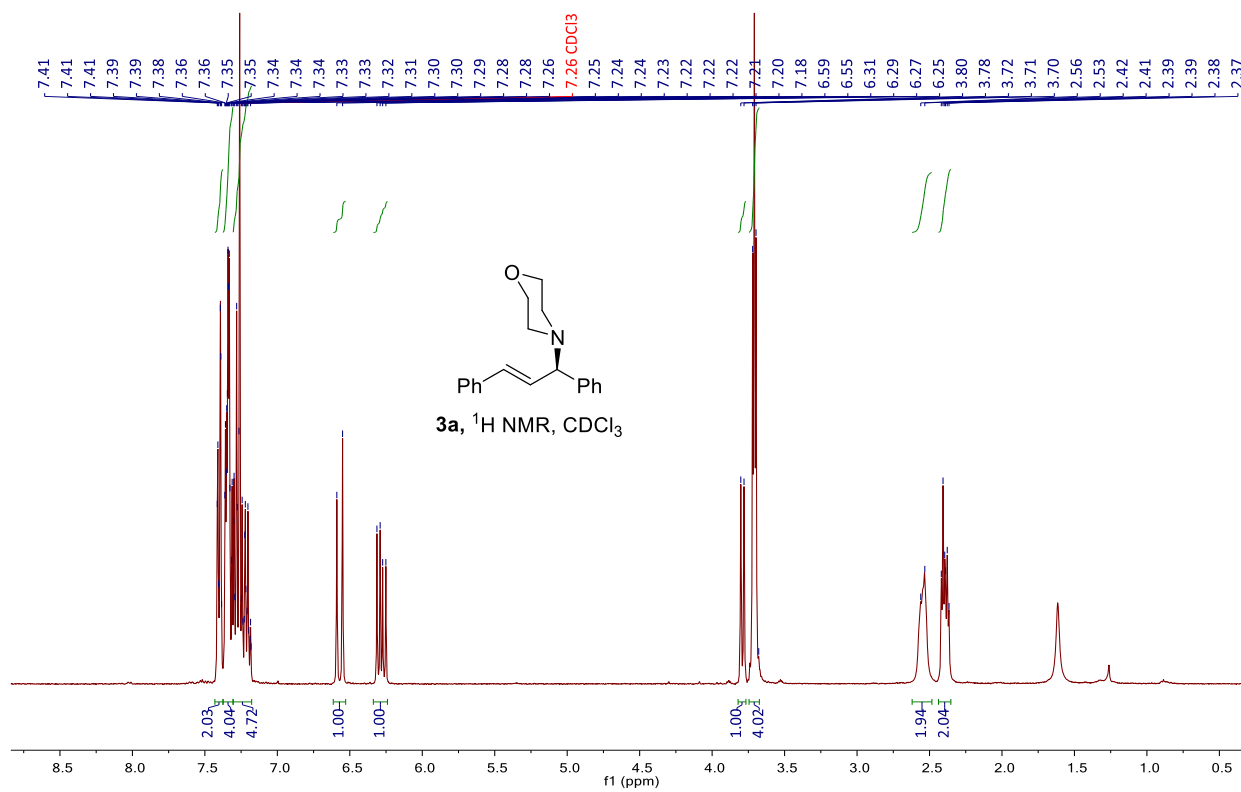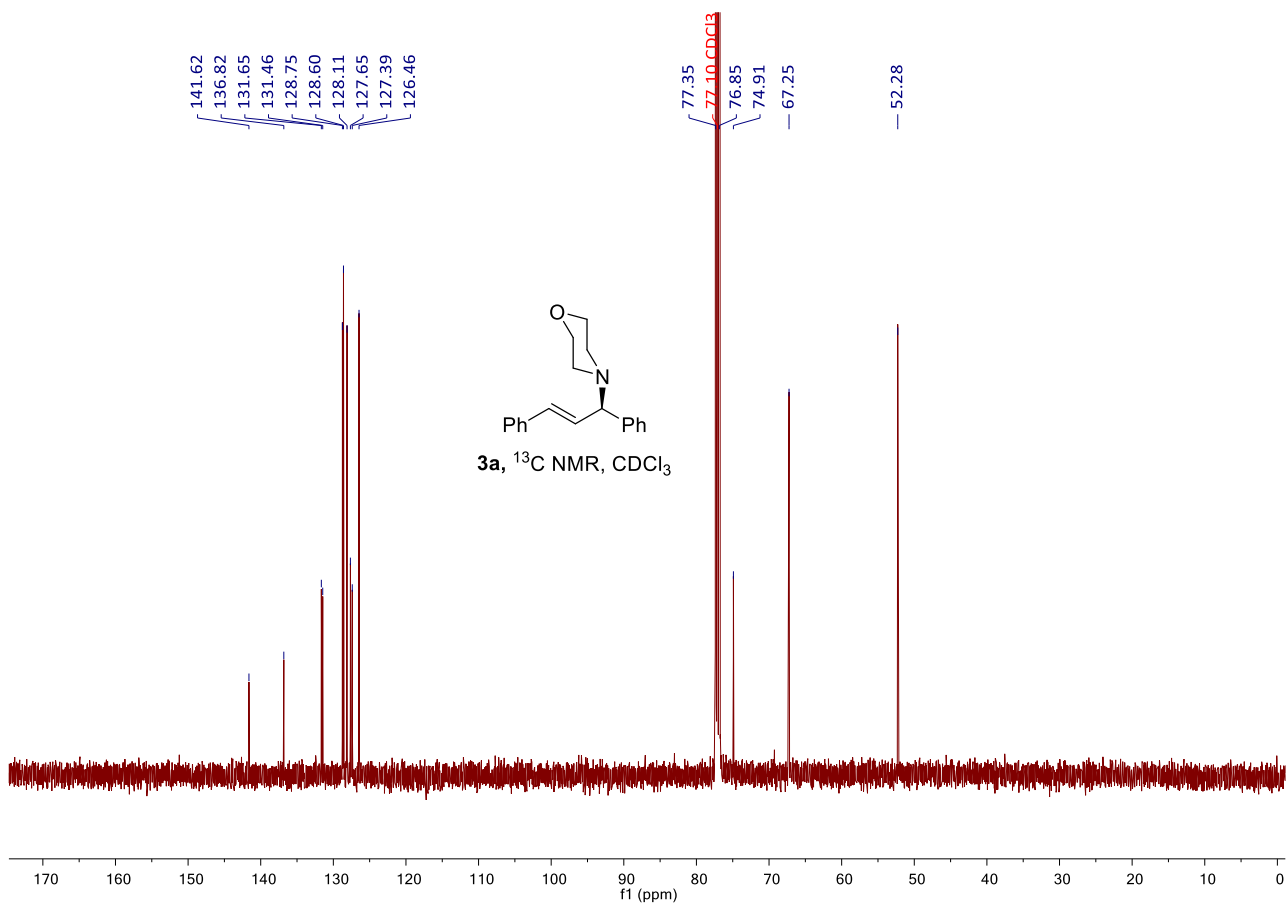



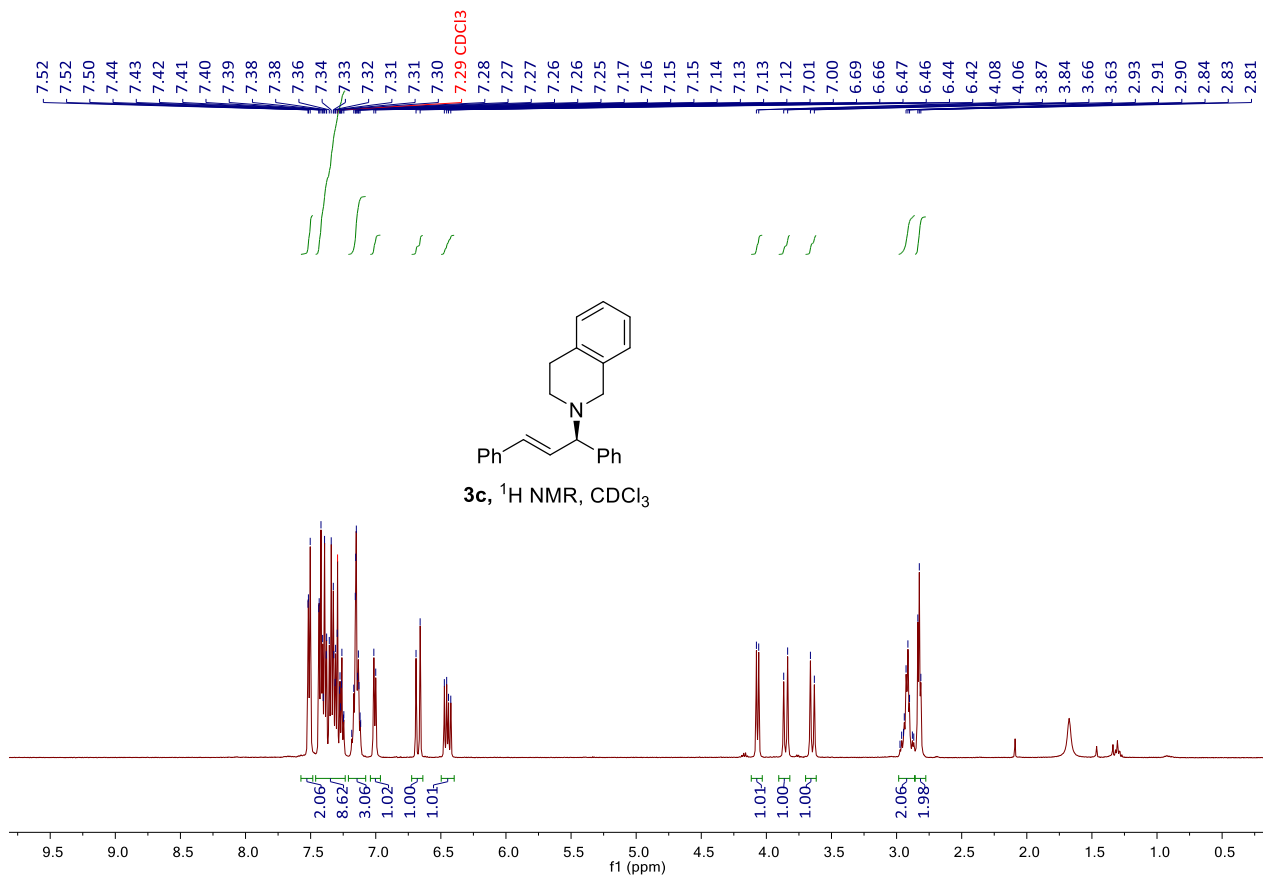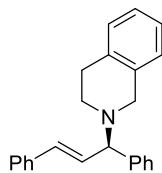

**3c**, <sup>1</sup>H NMR, CDCl<sub>3</sub>

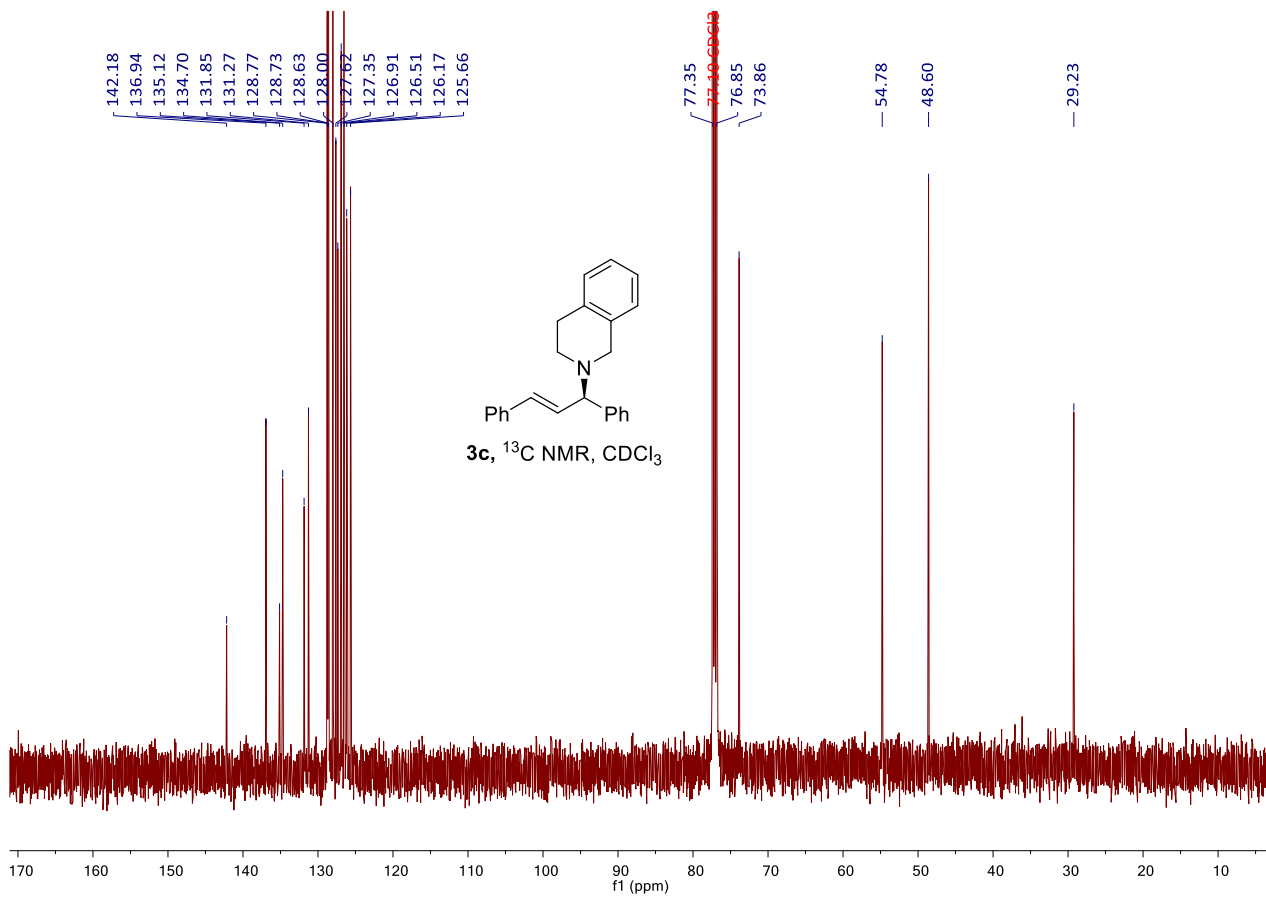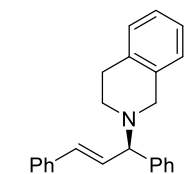

**3c**, <sup>13</sup>C NMR, CDCl<sub>3</sub>



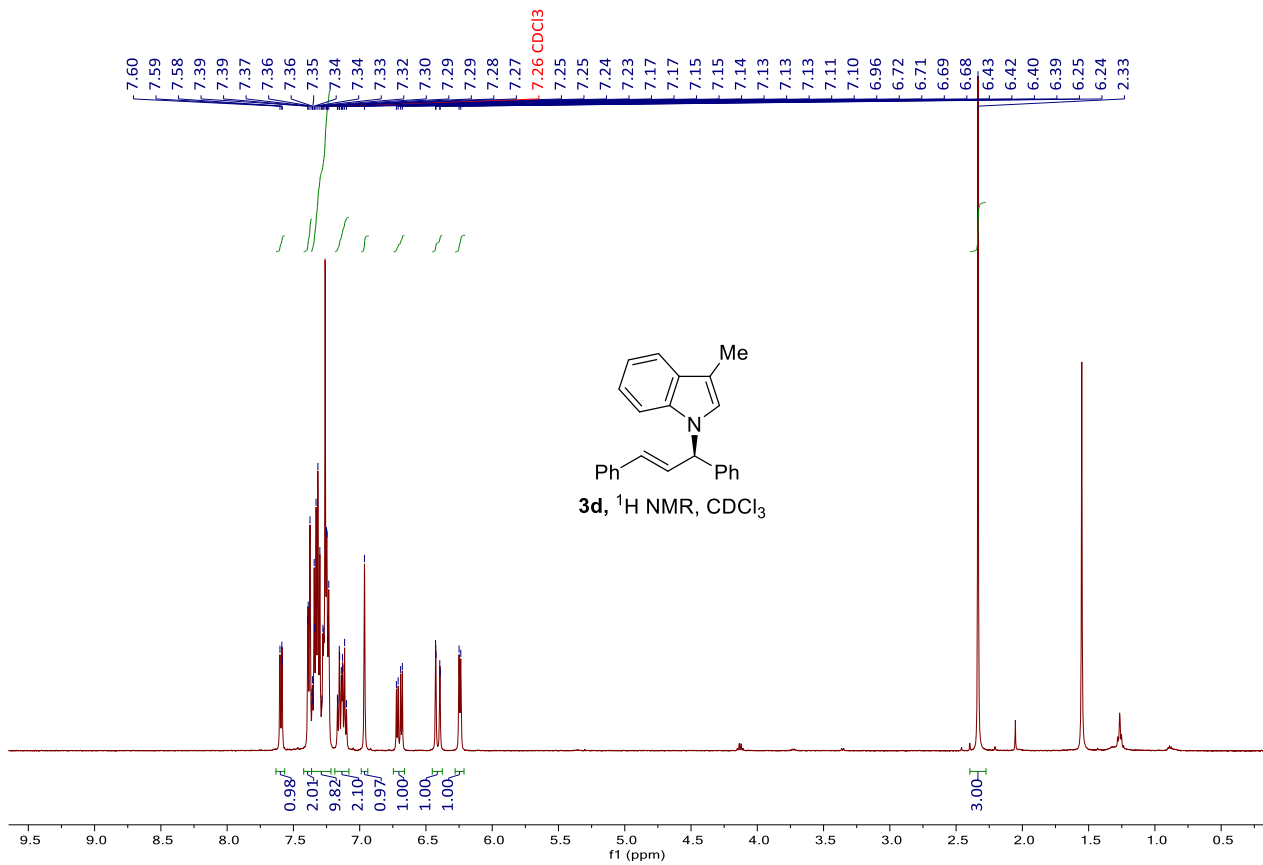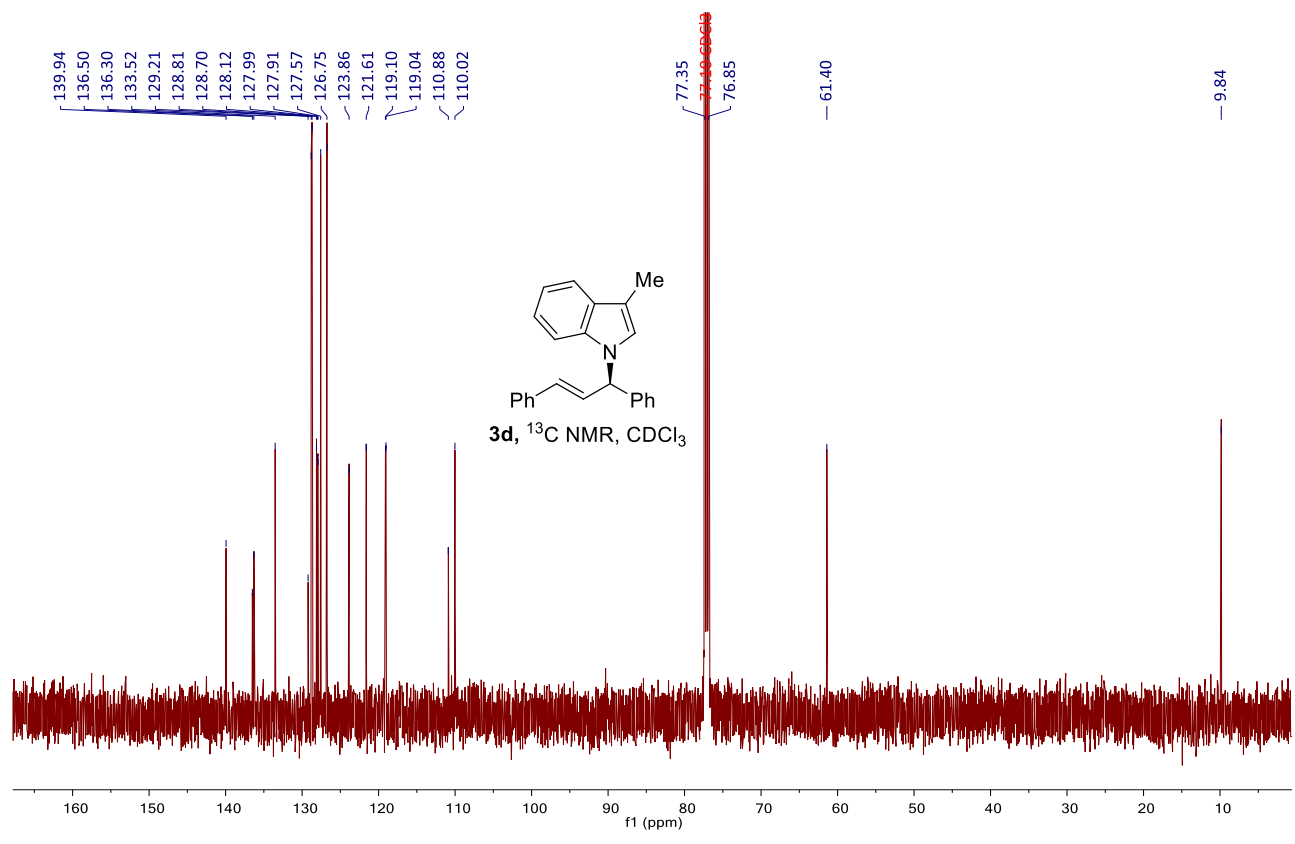

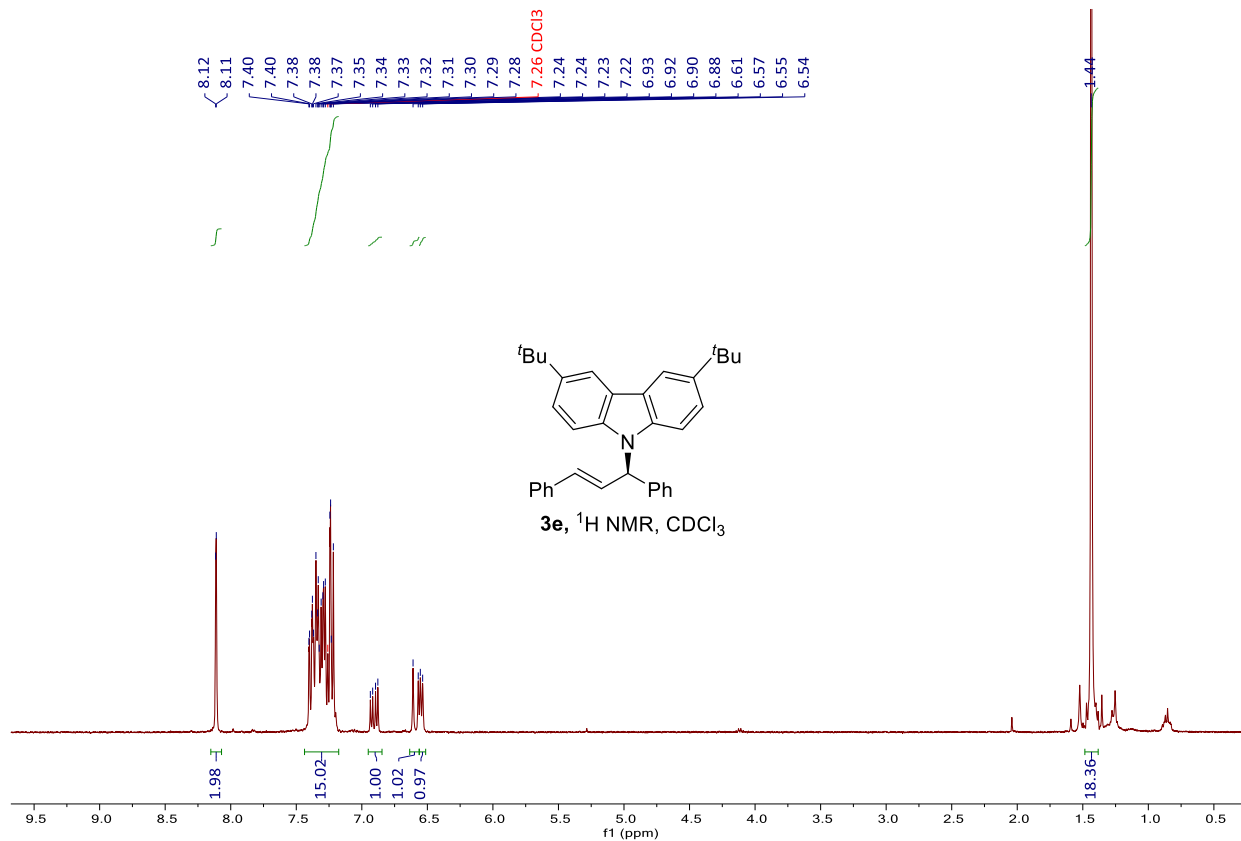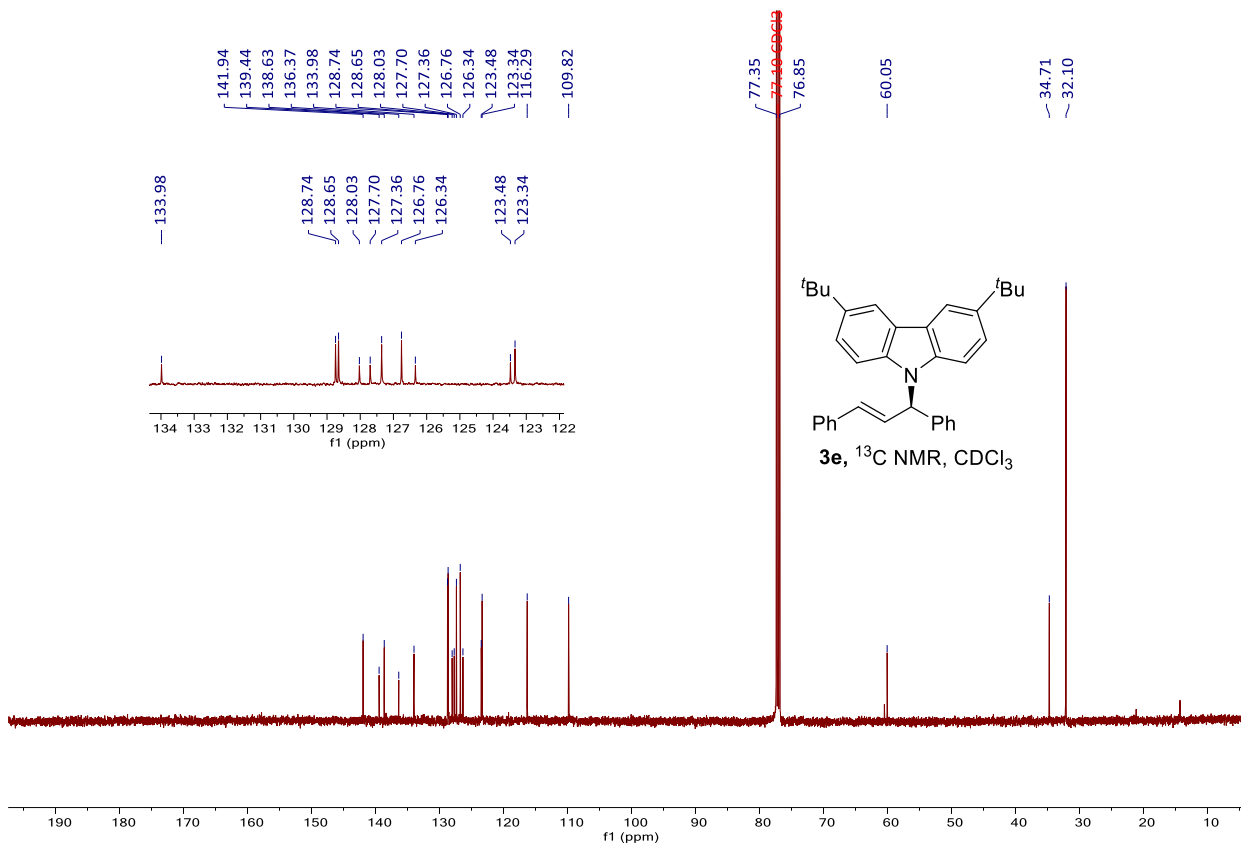

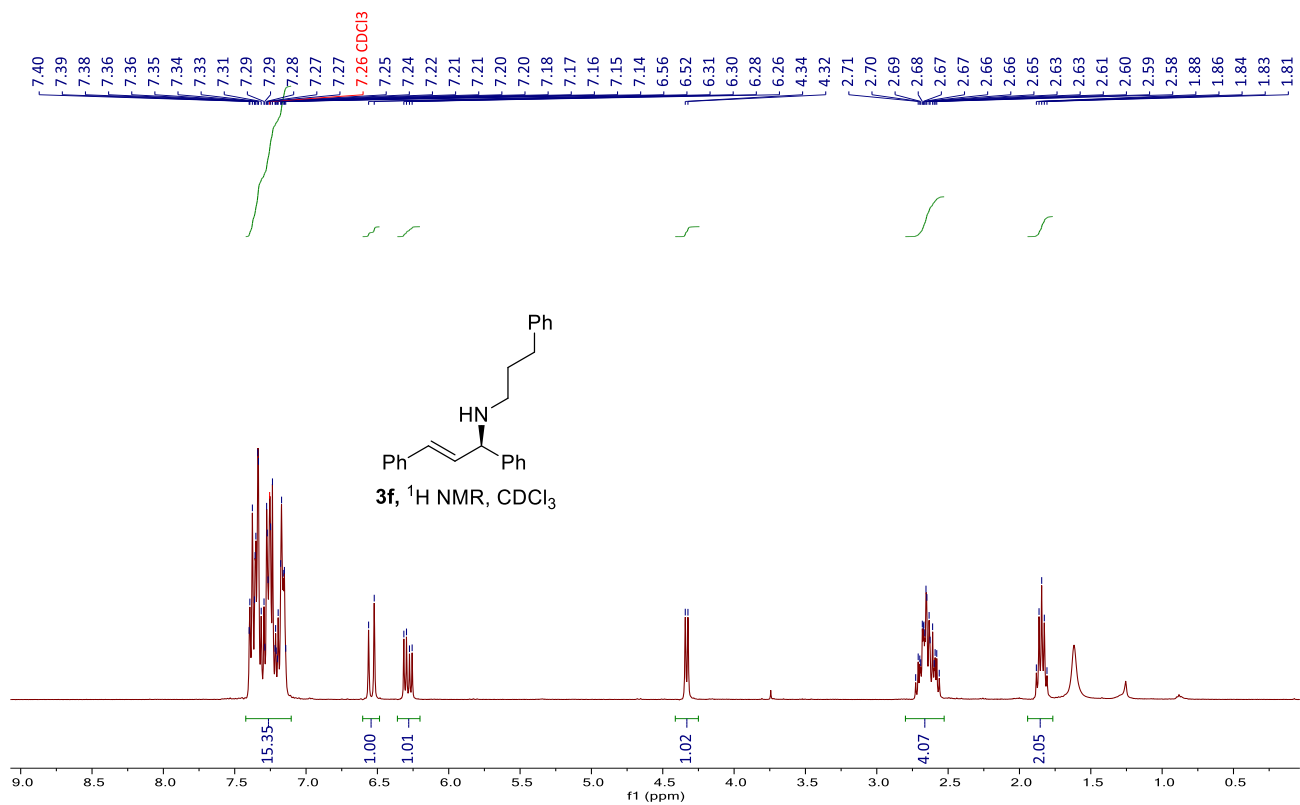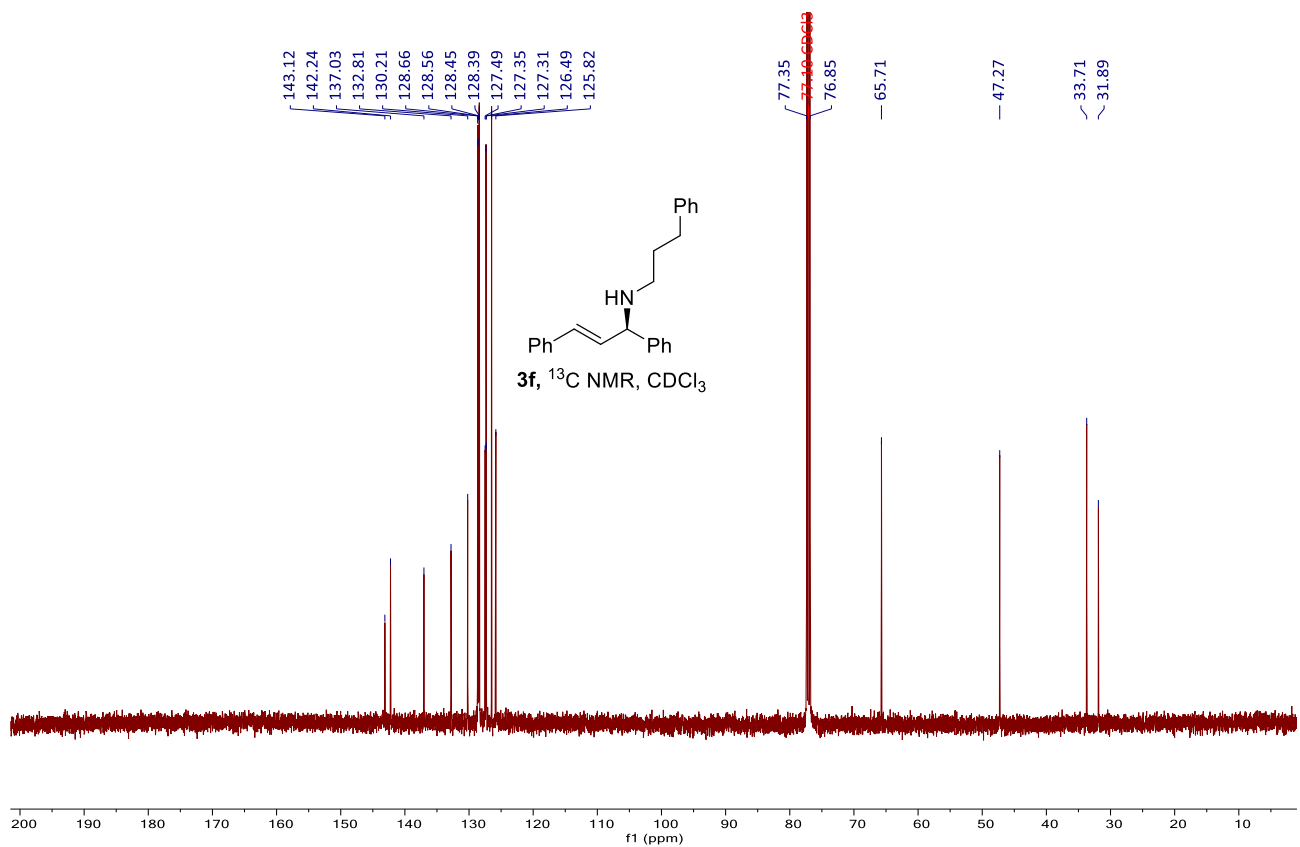

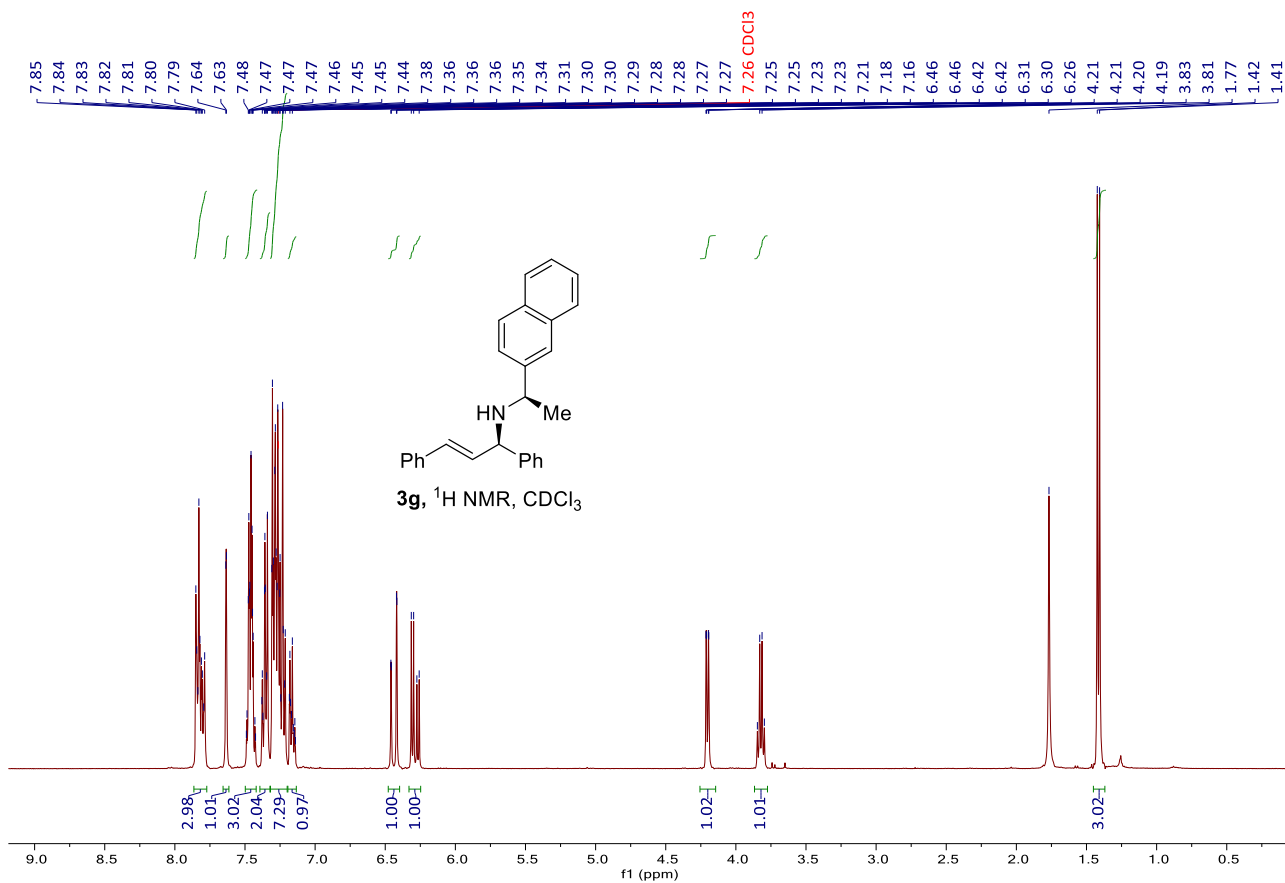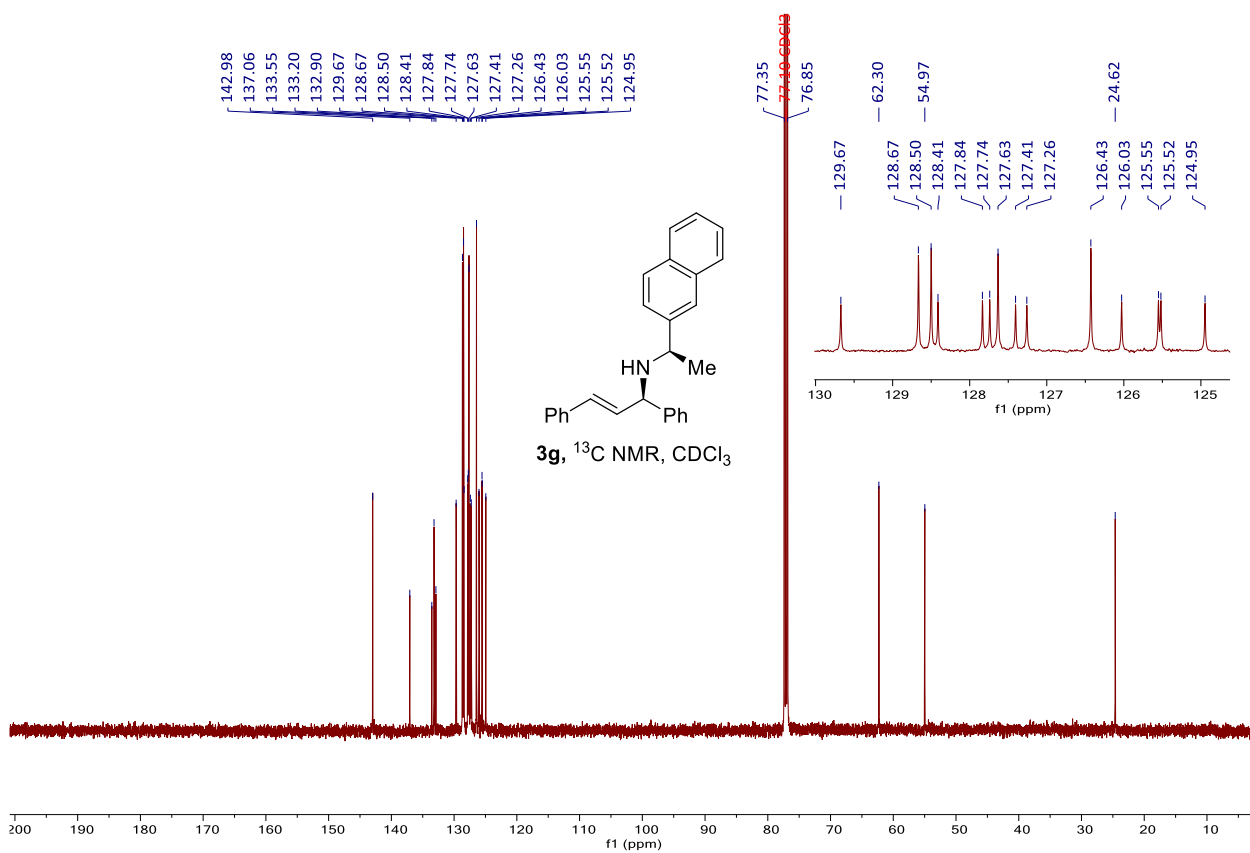

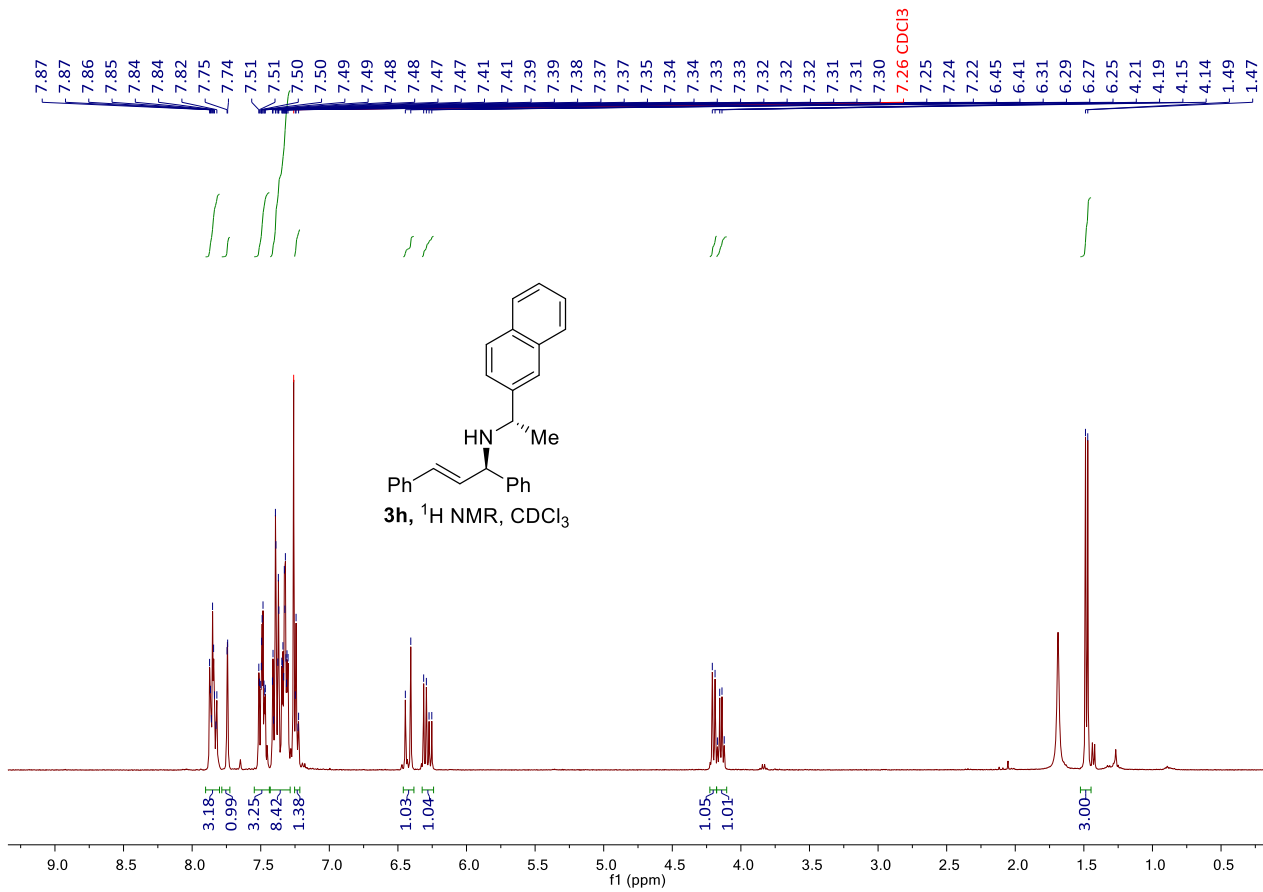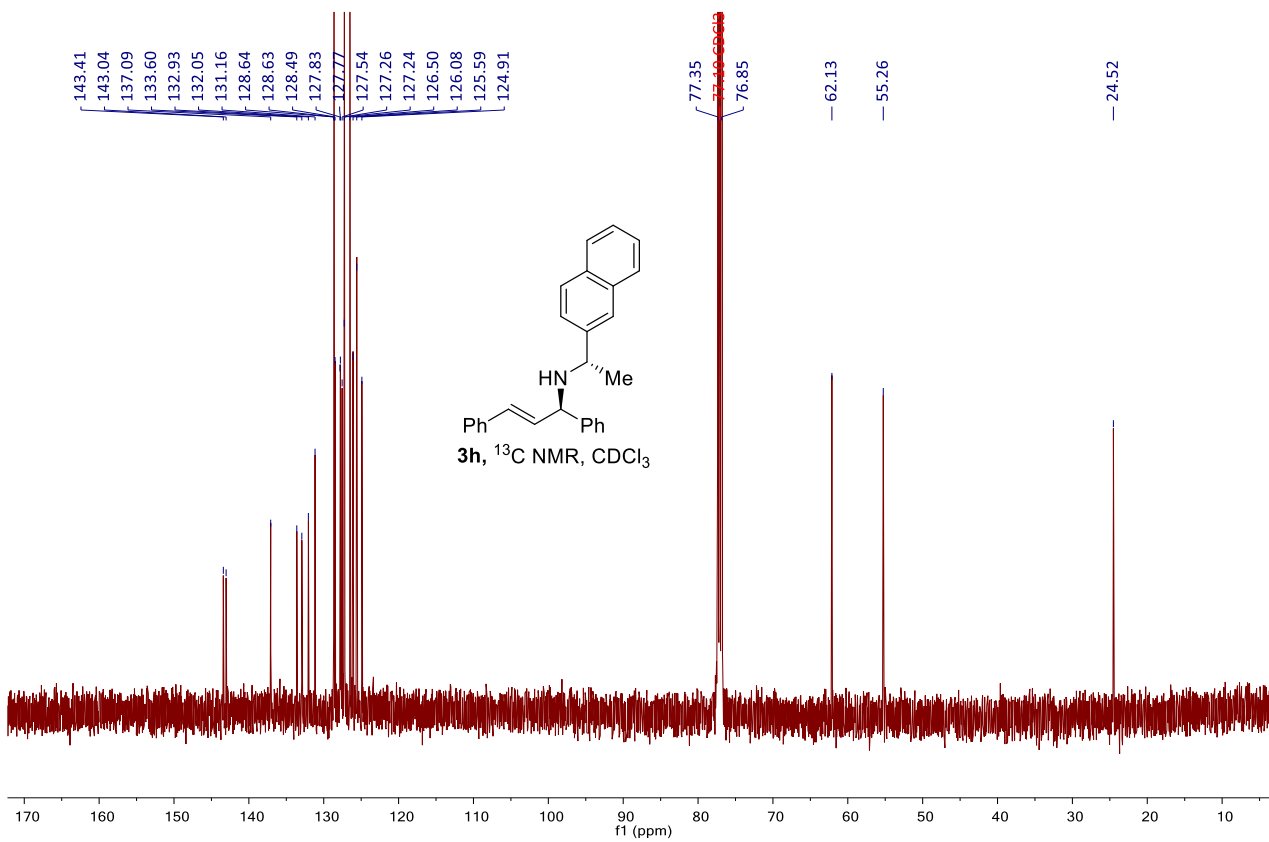

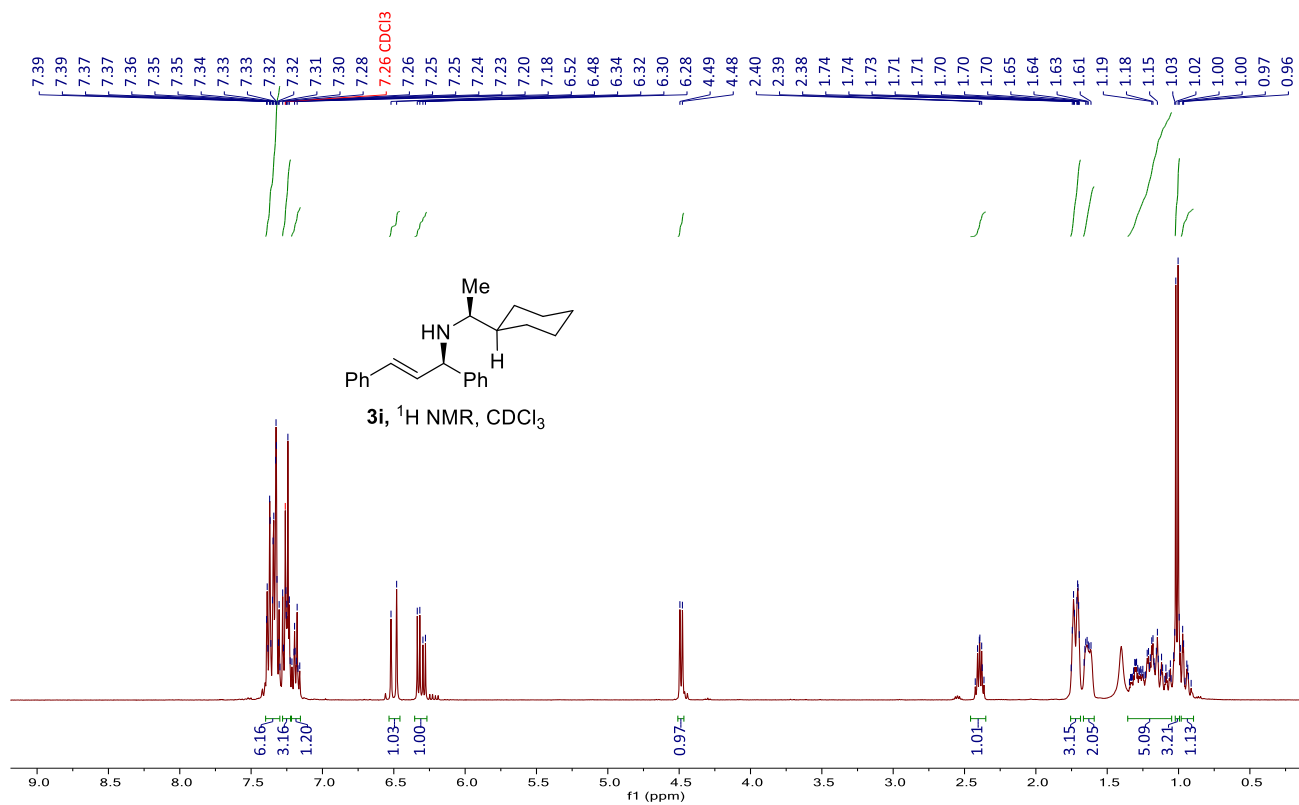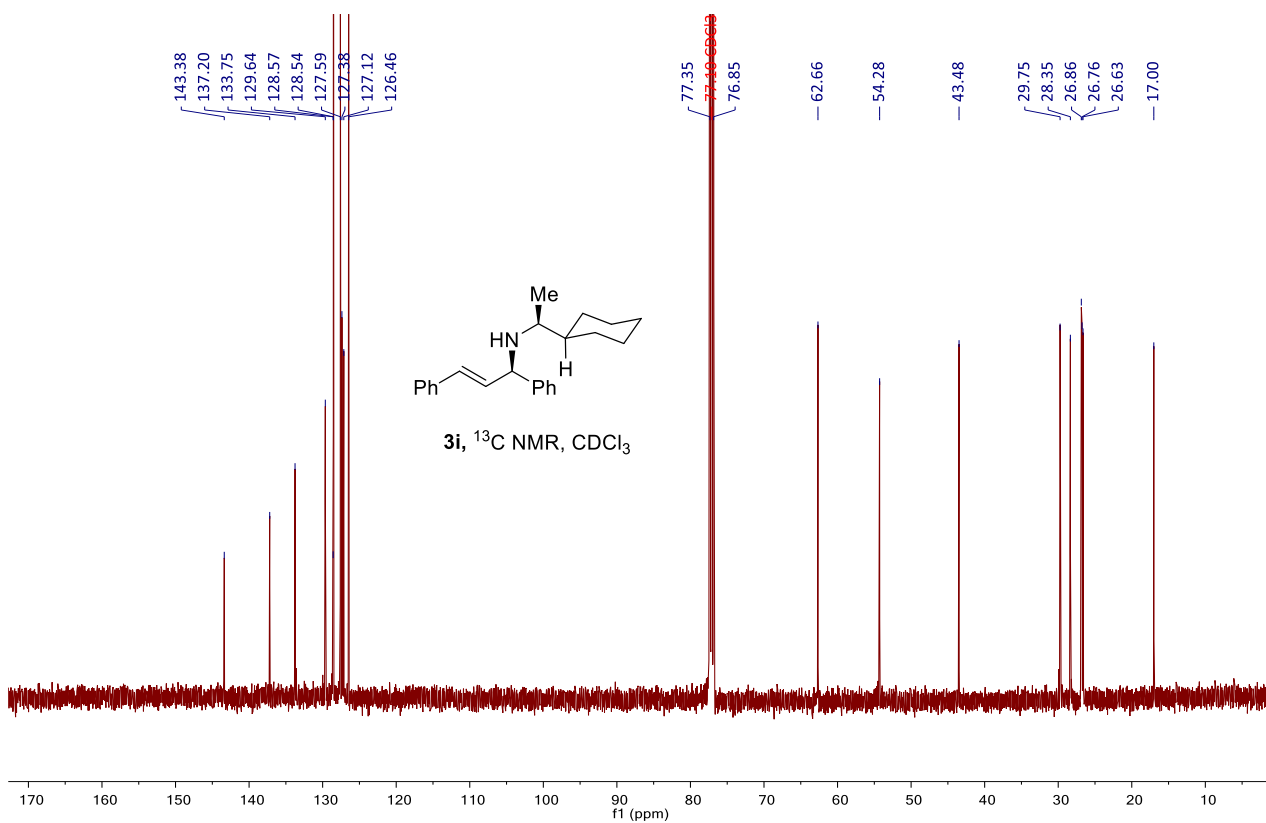

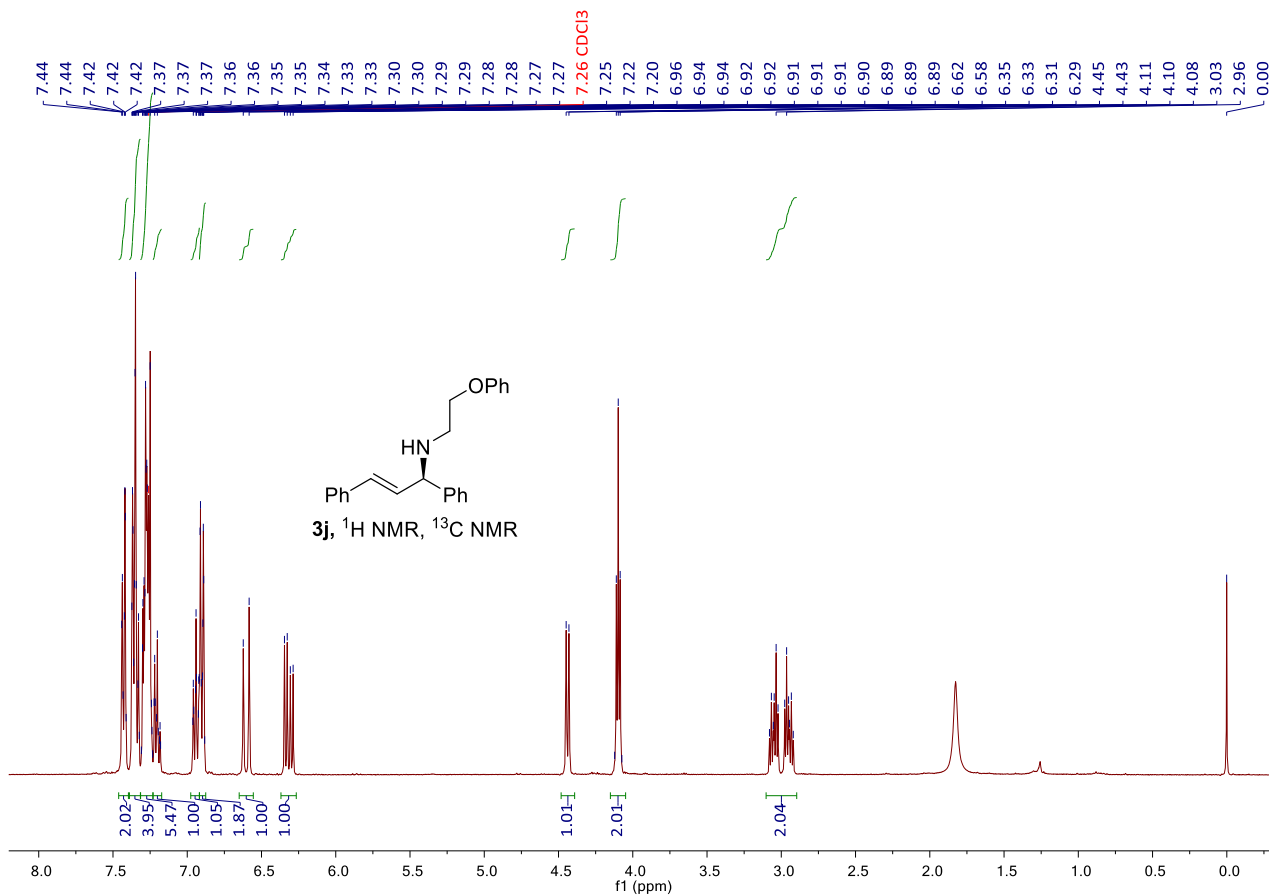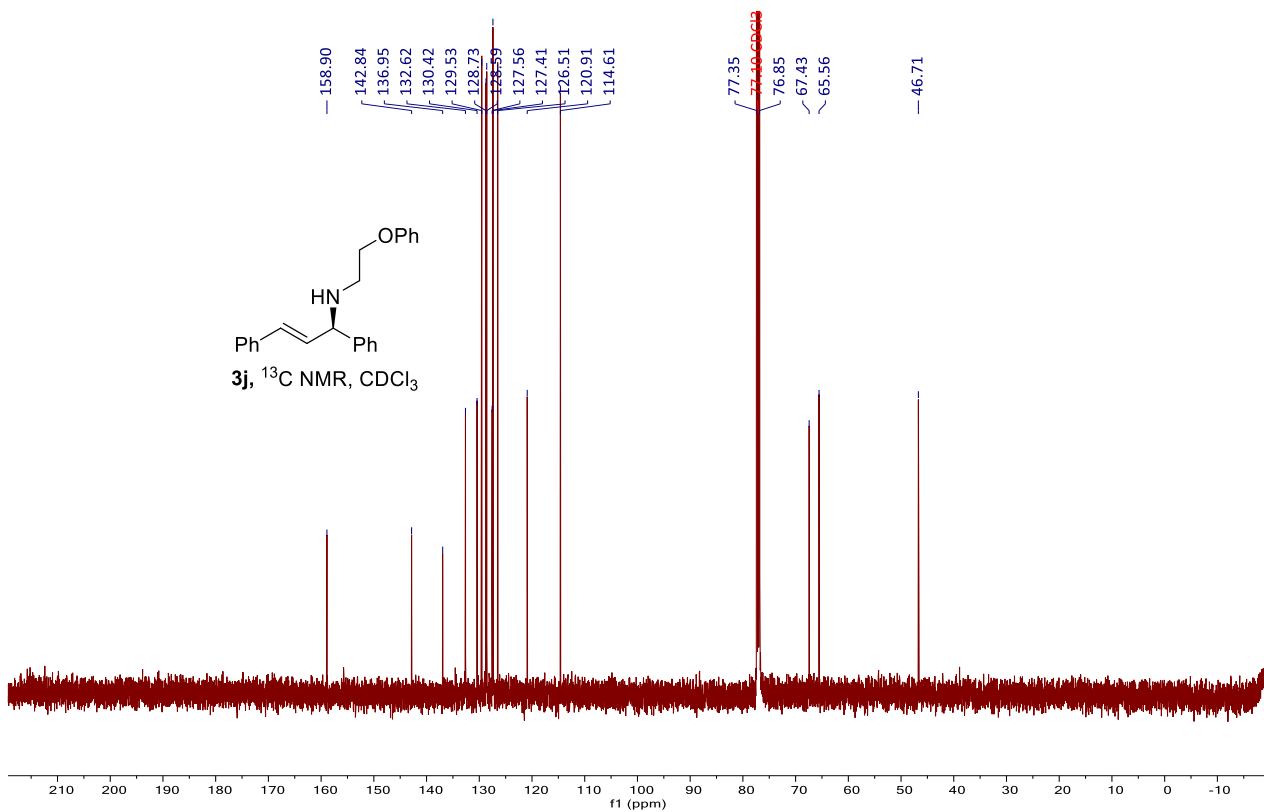

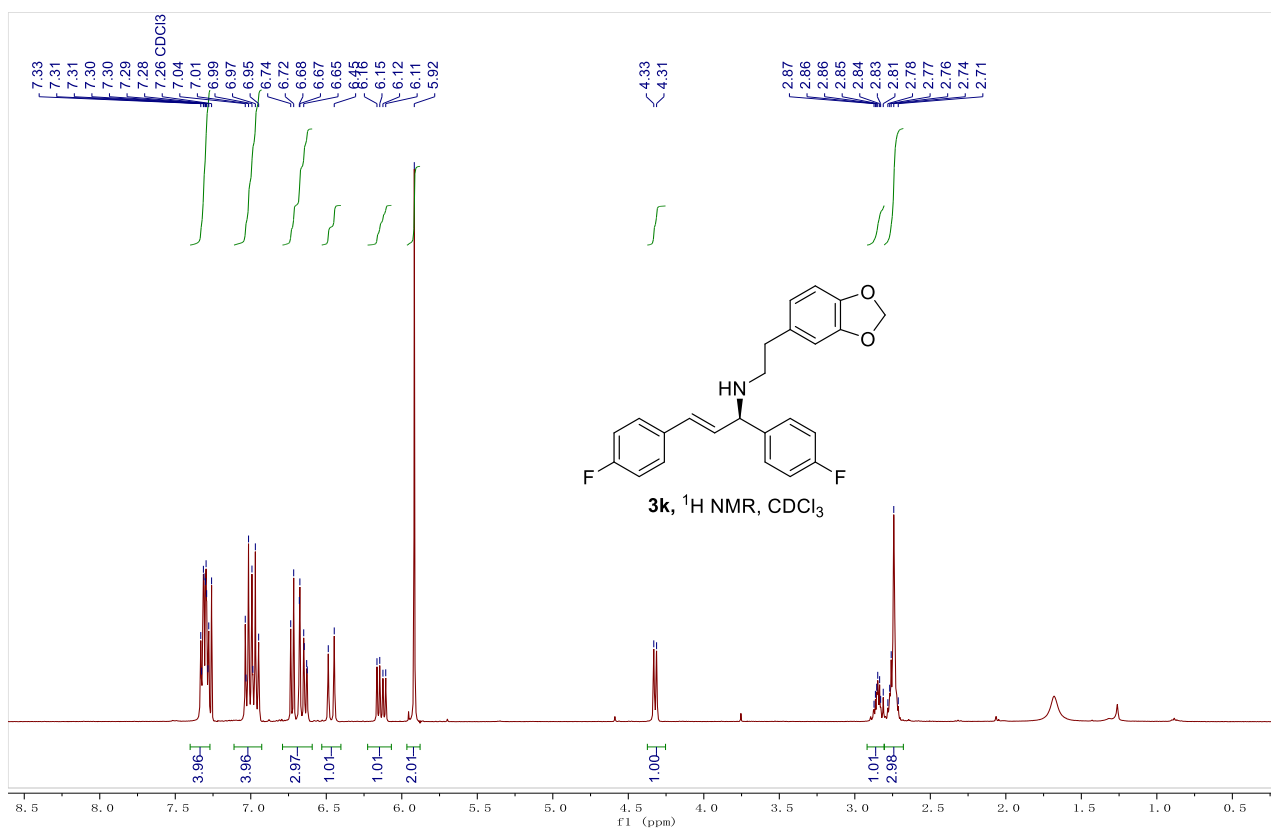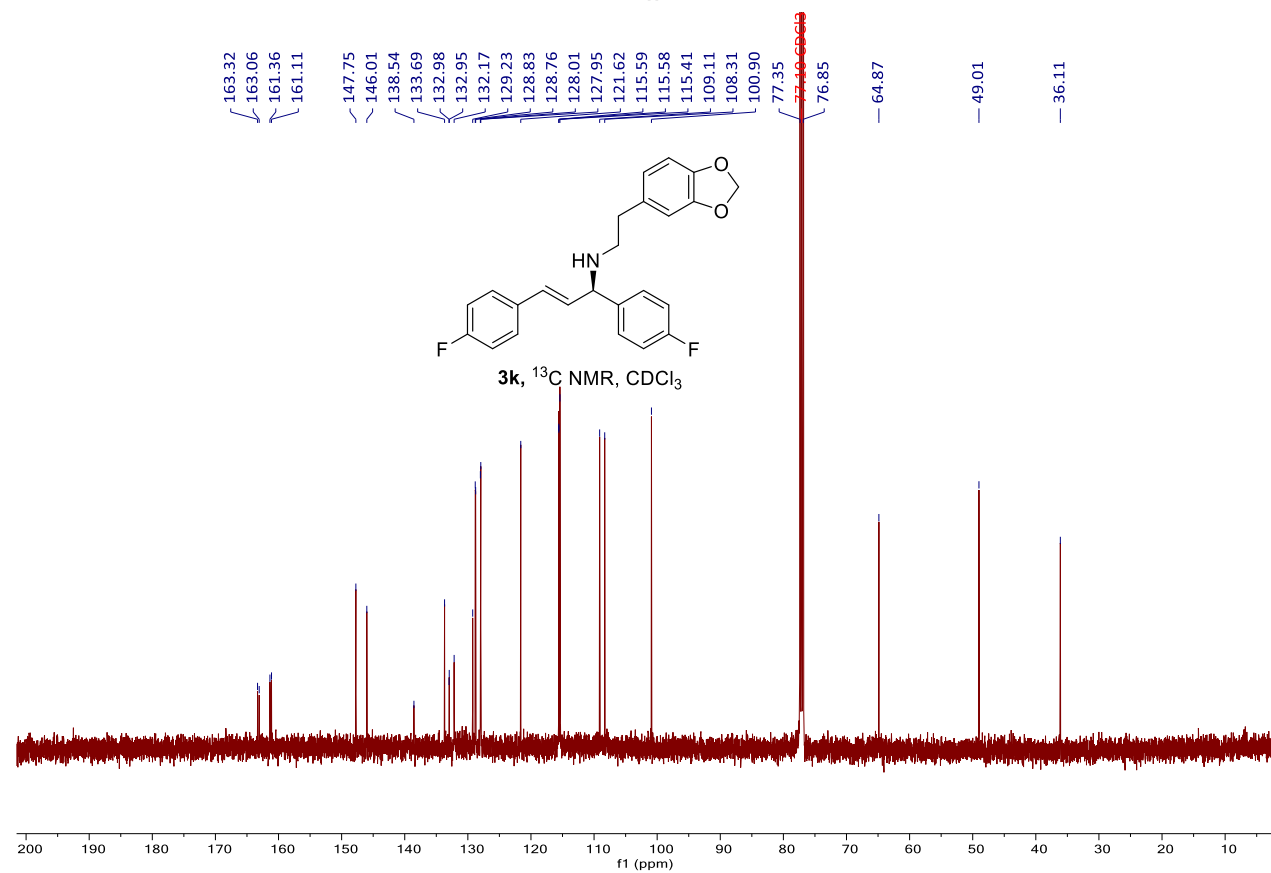



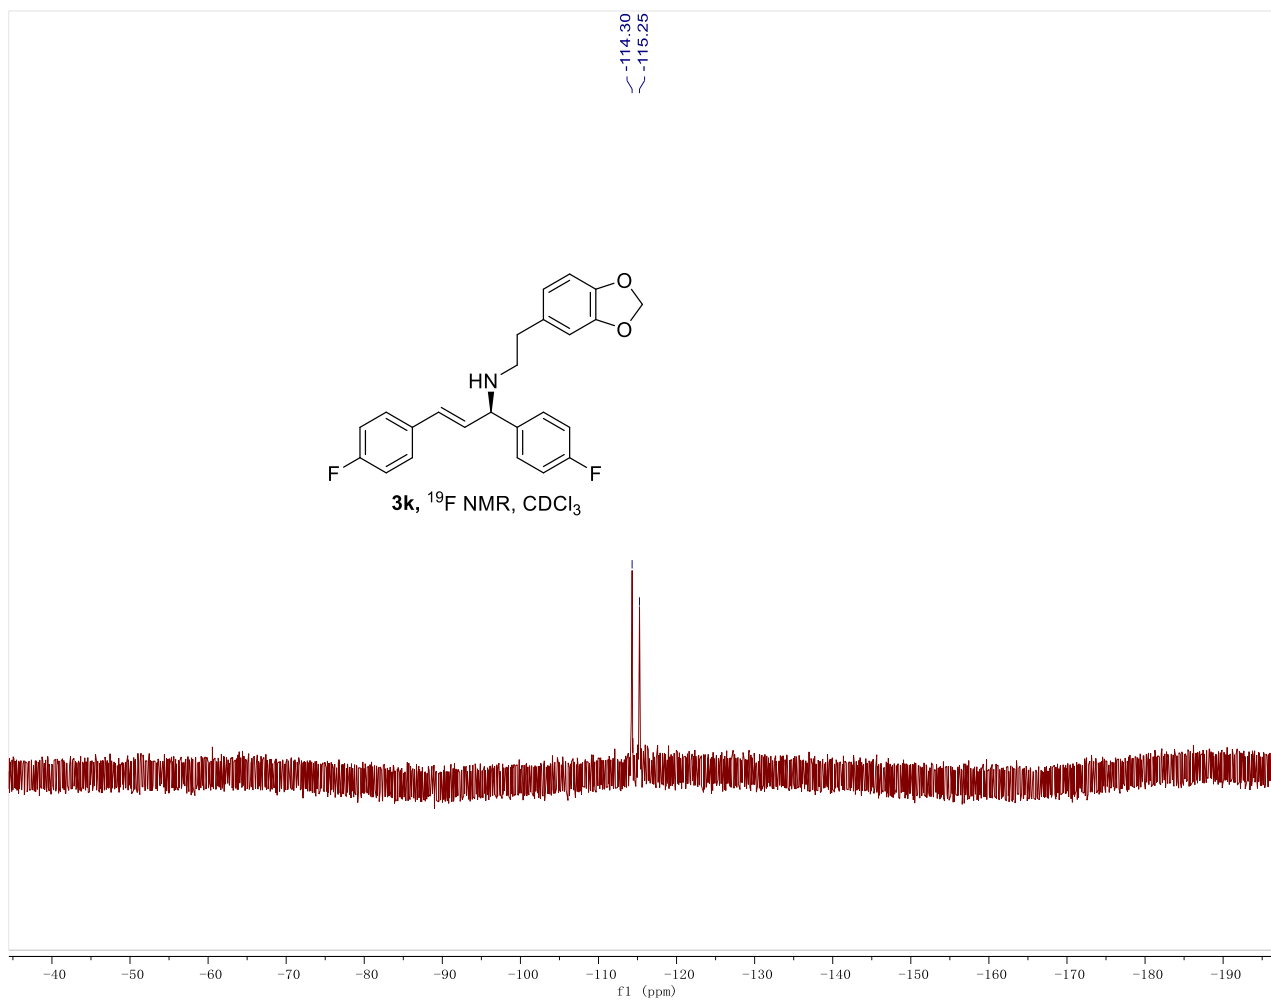

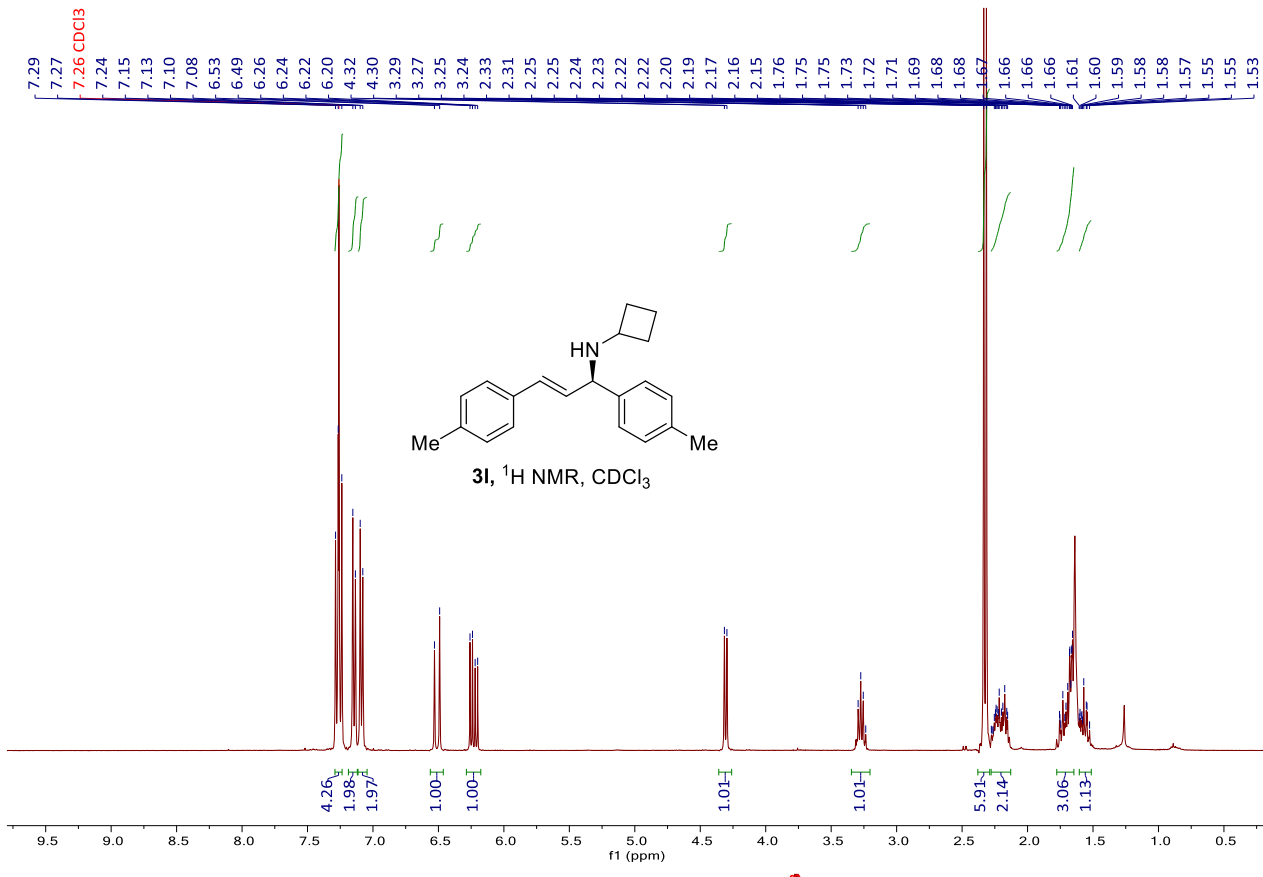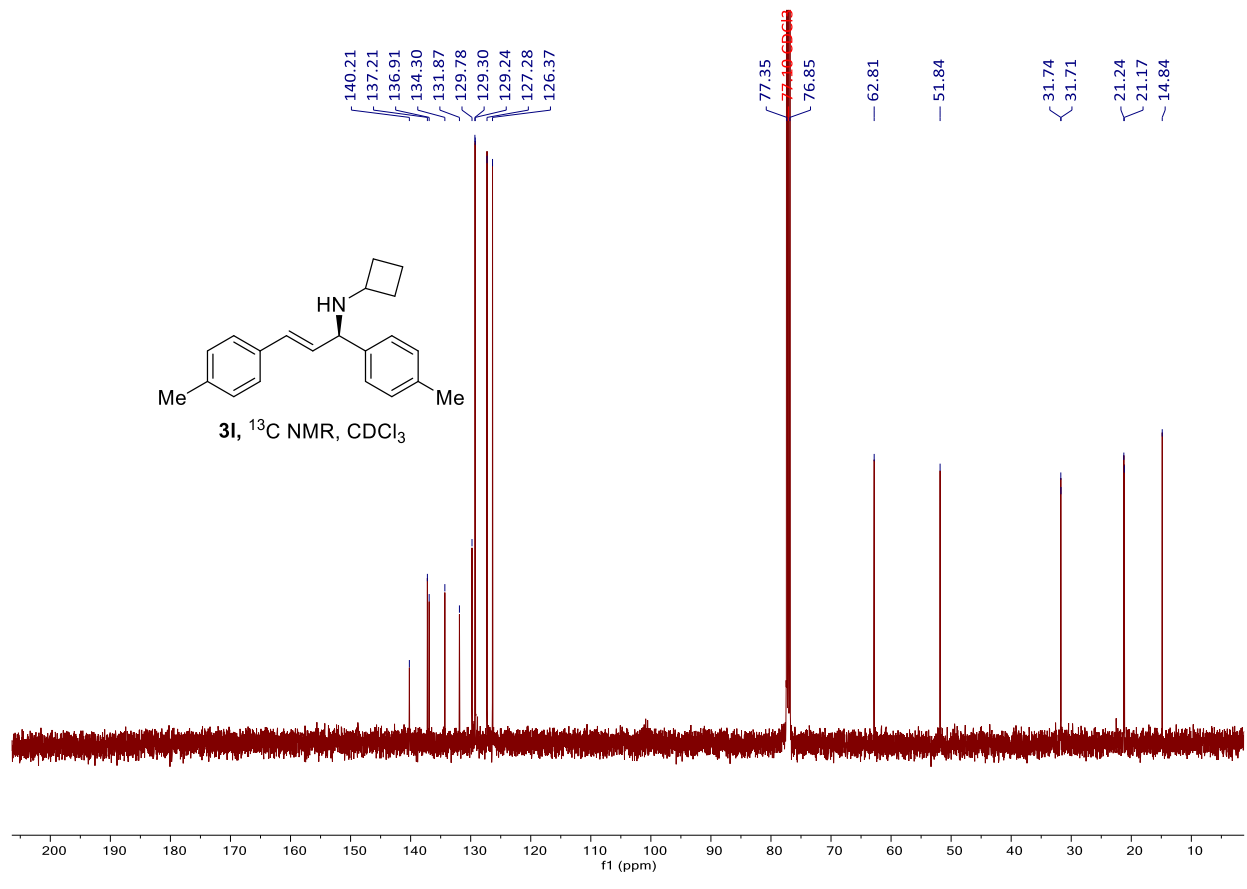

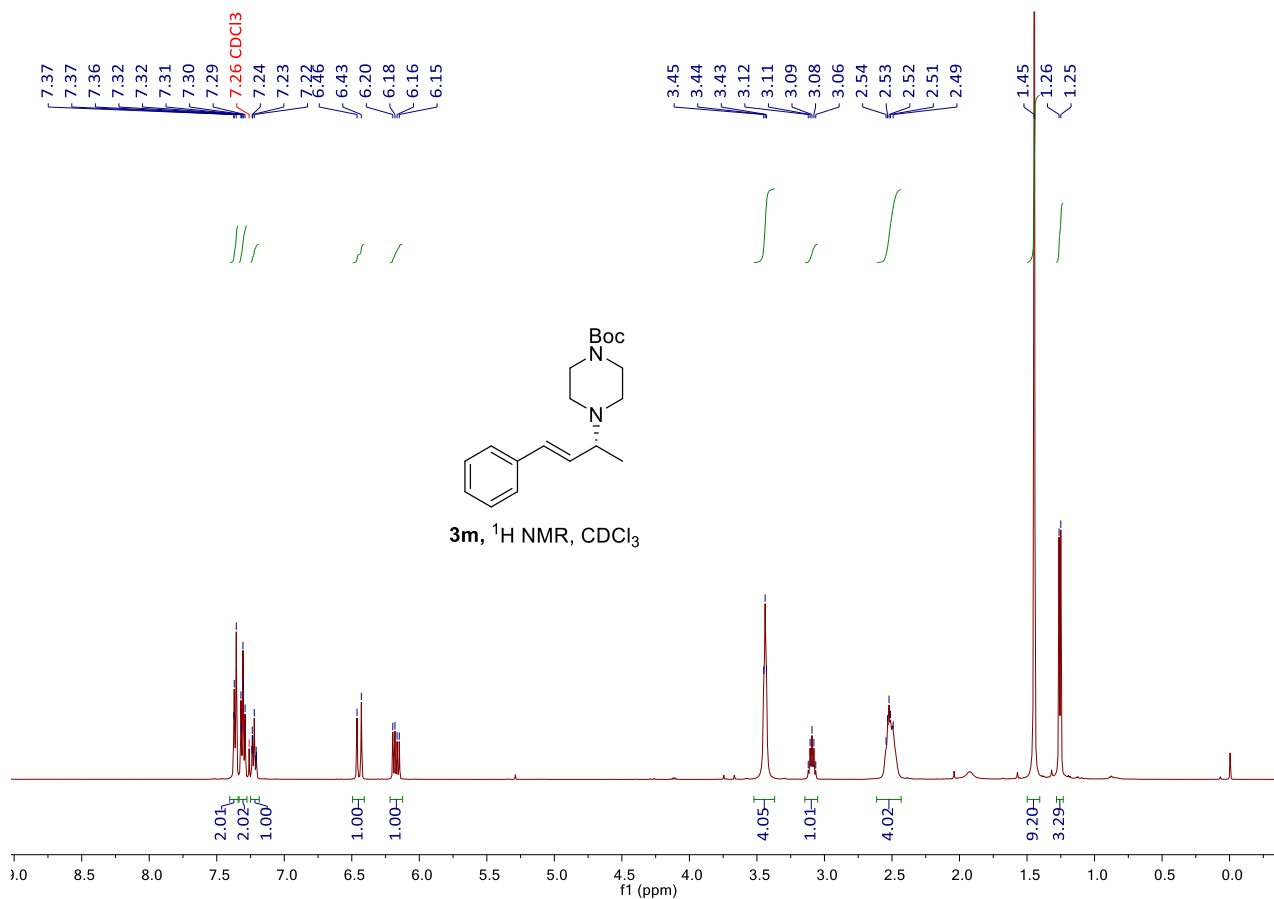

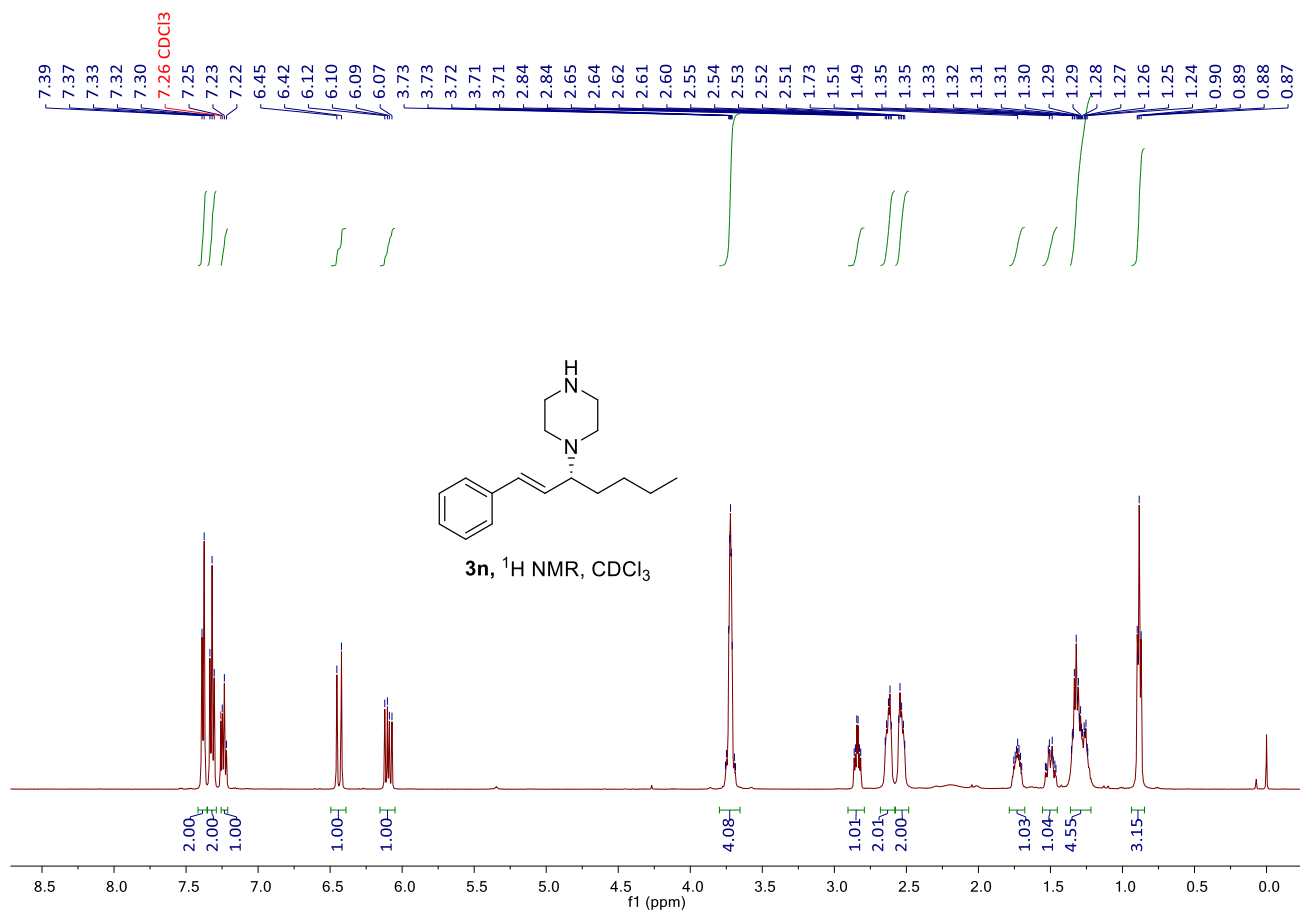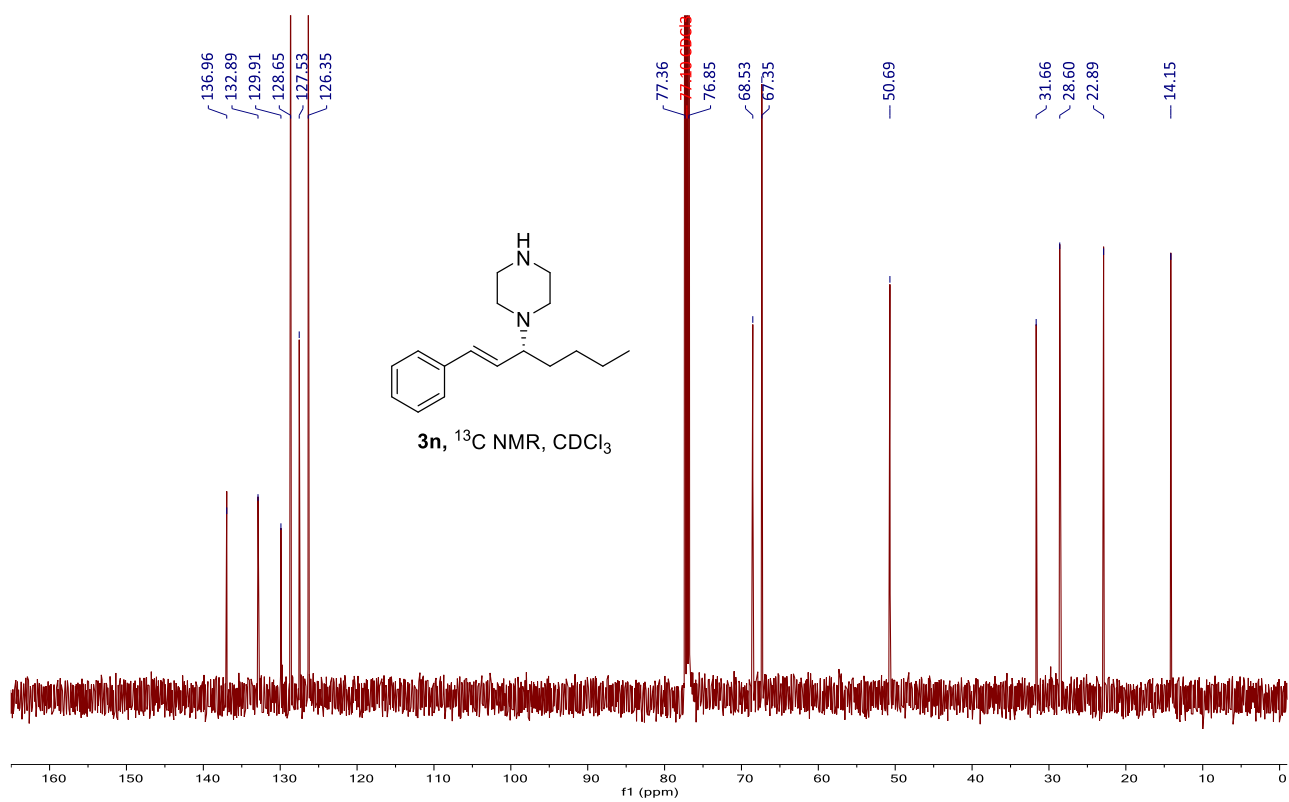

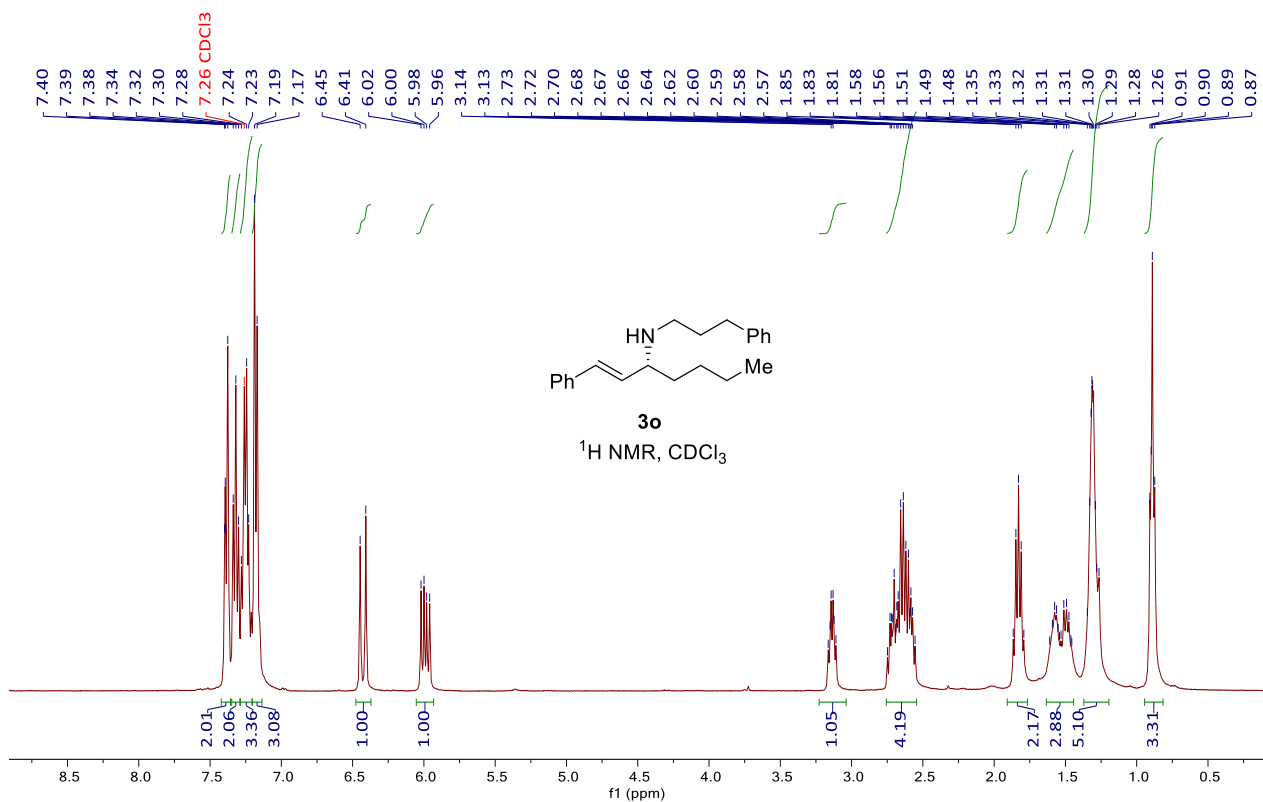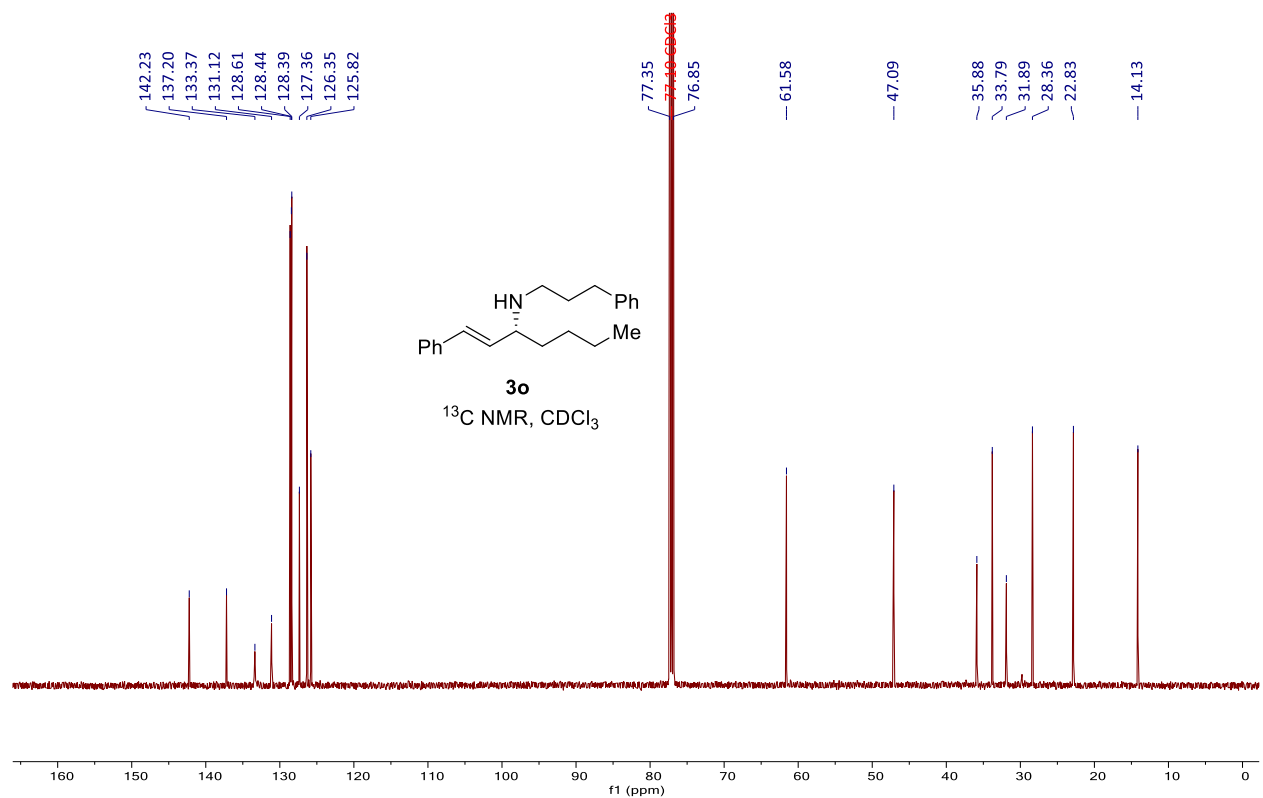

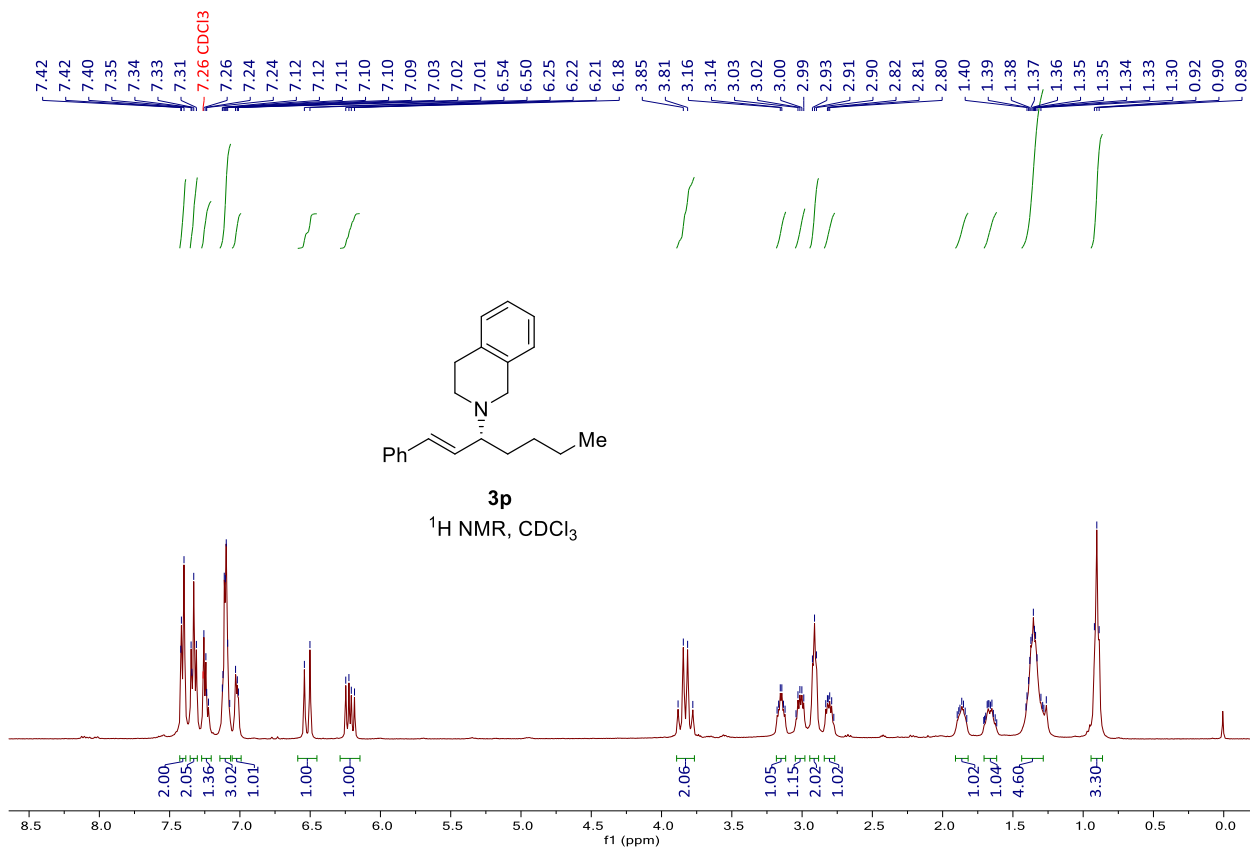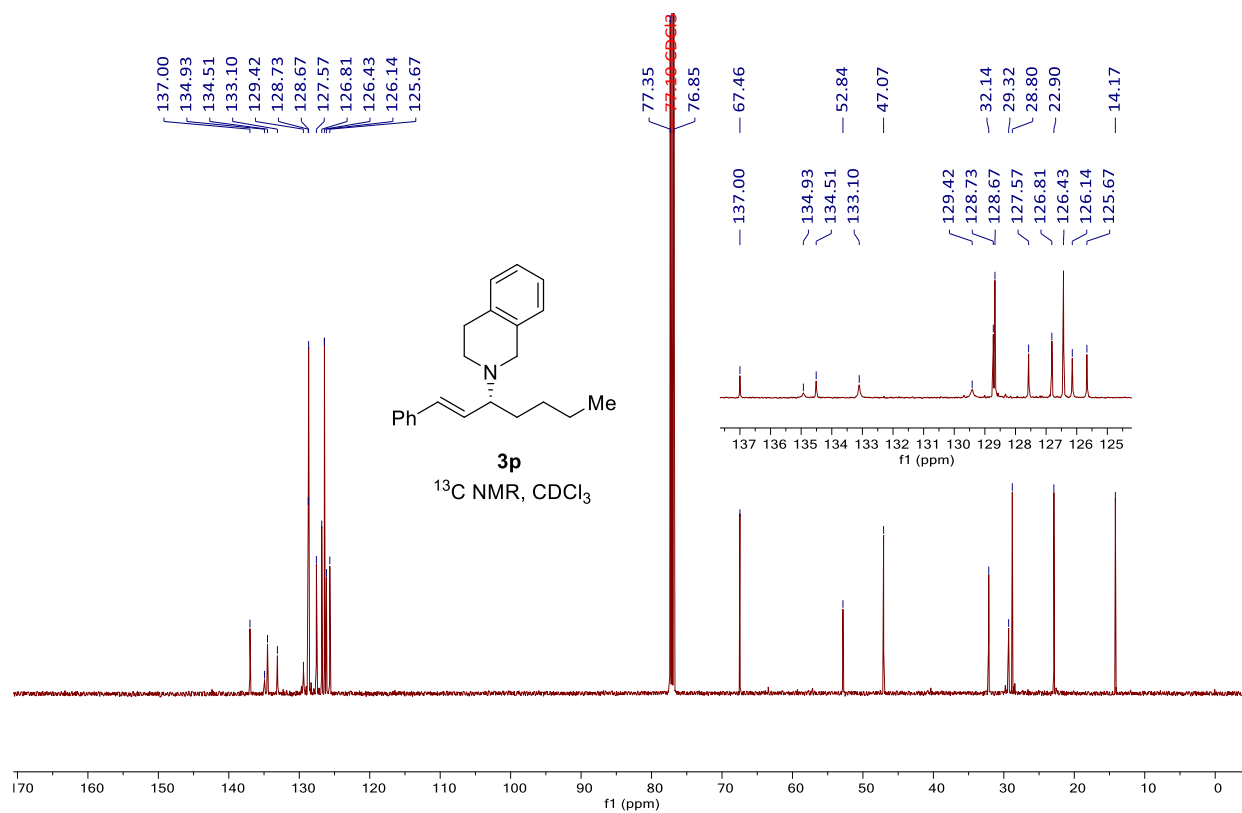

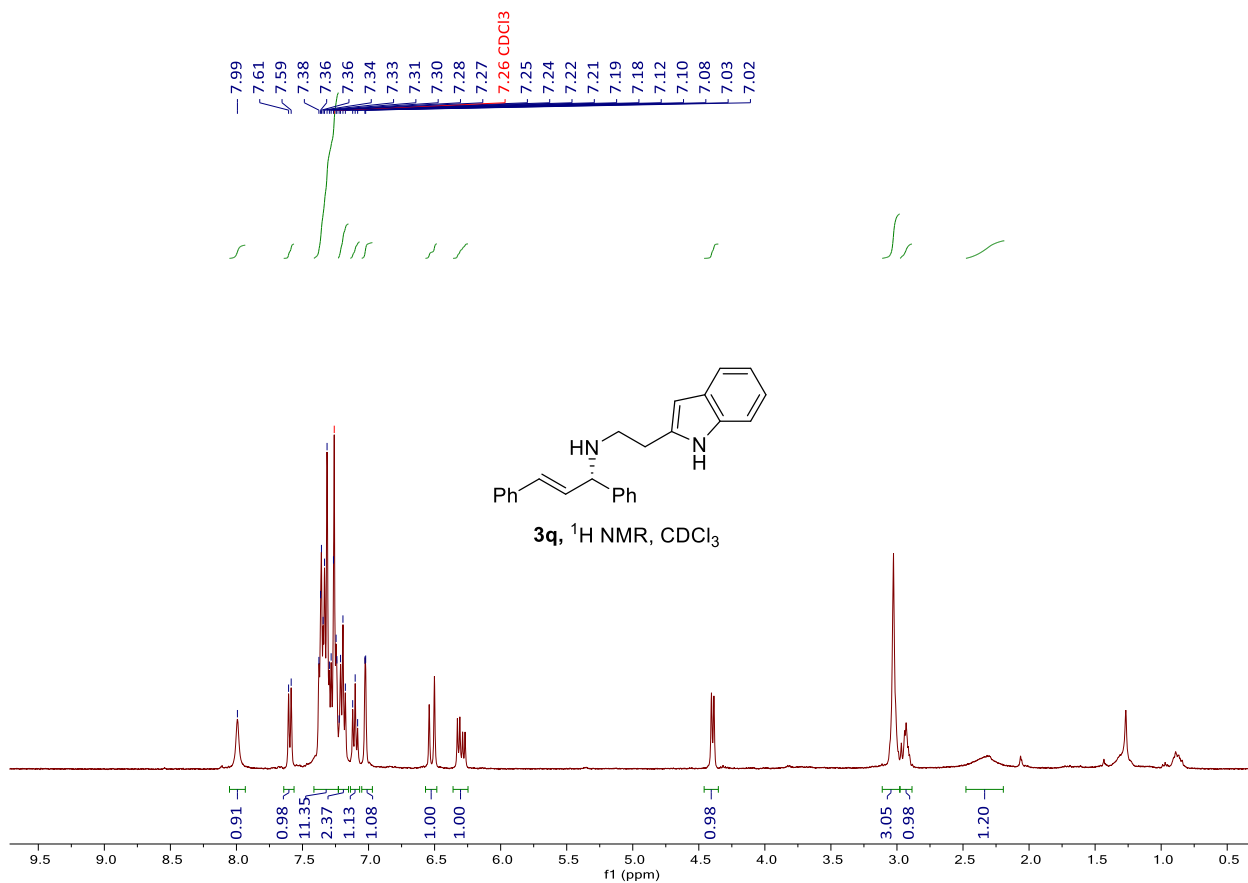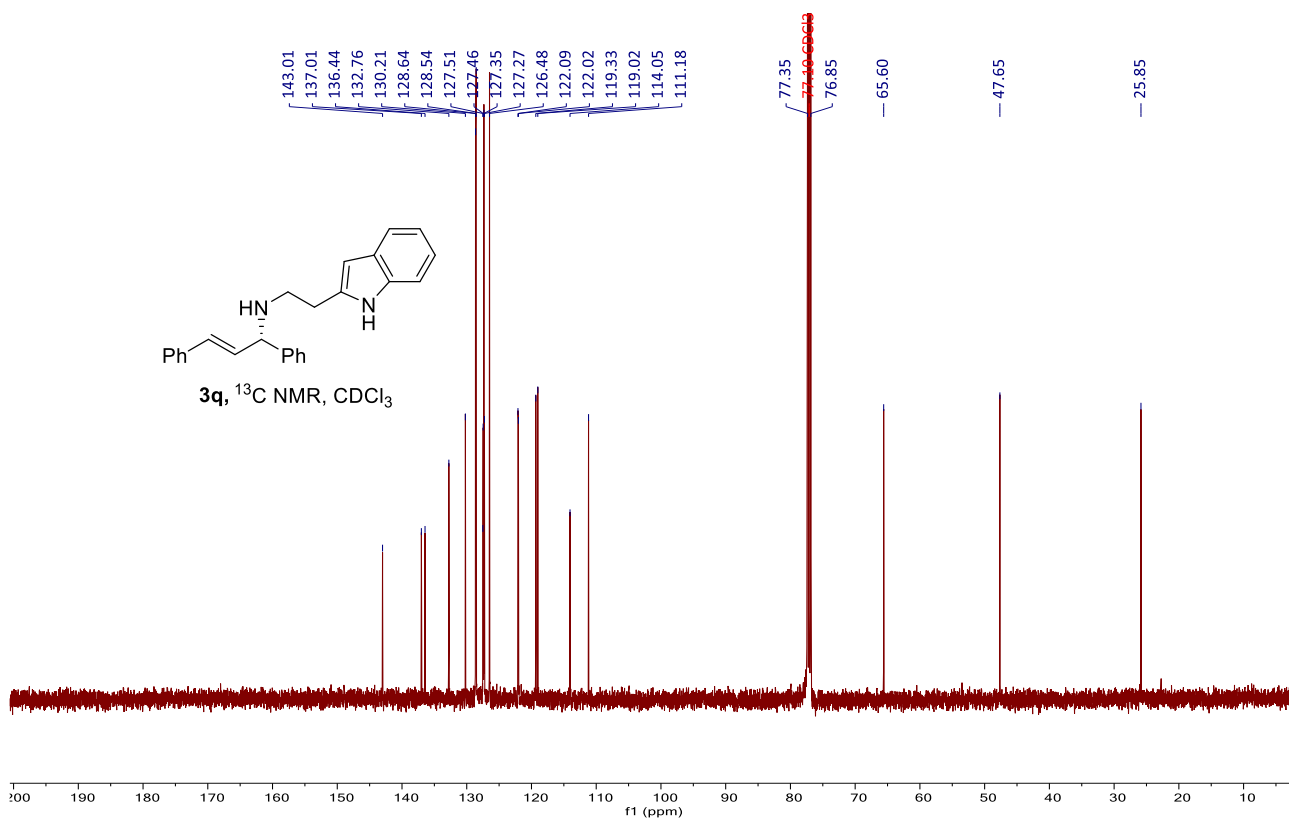

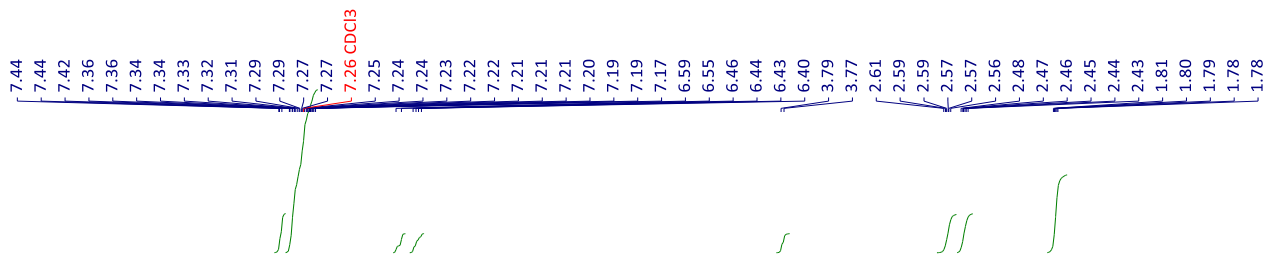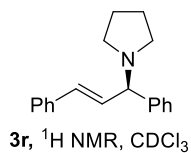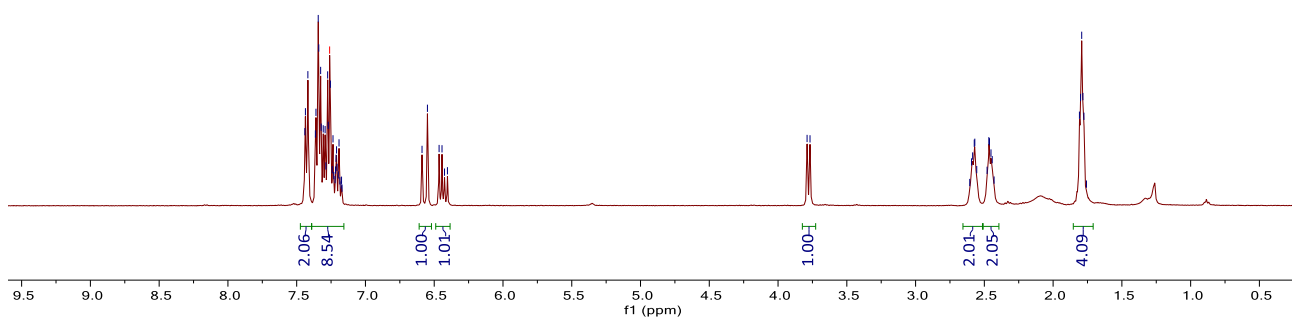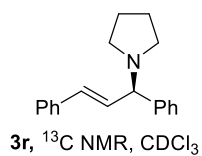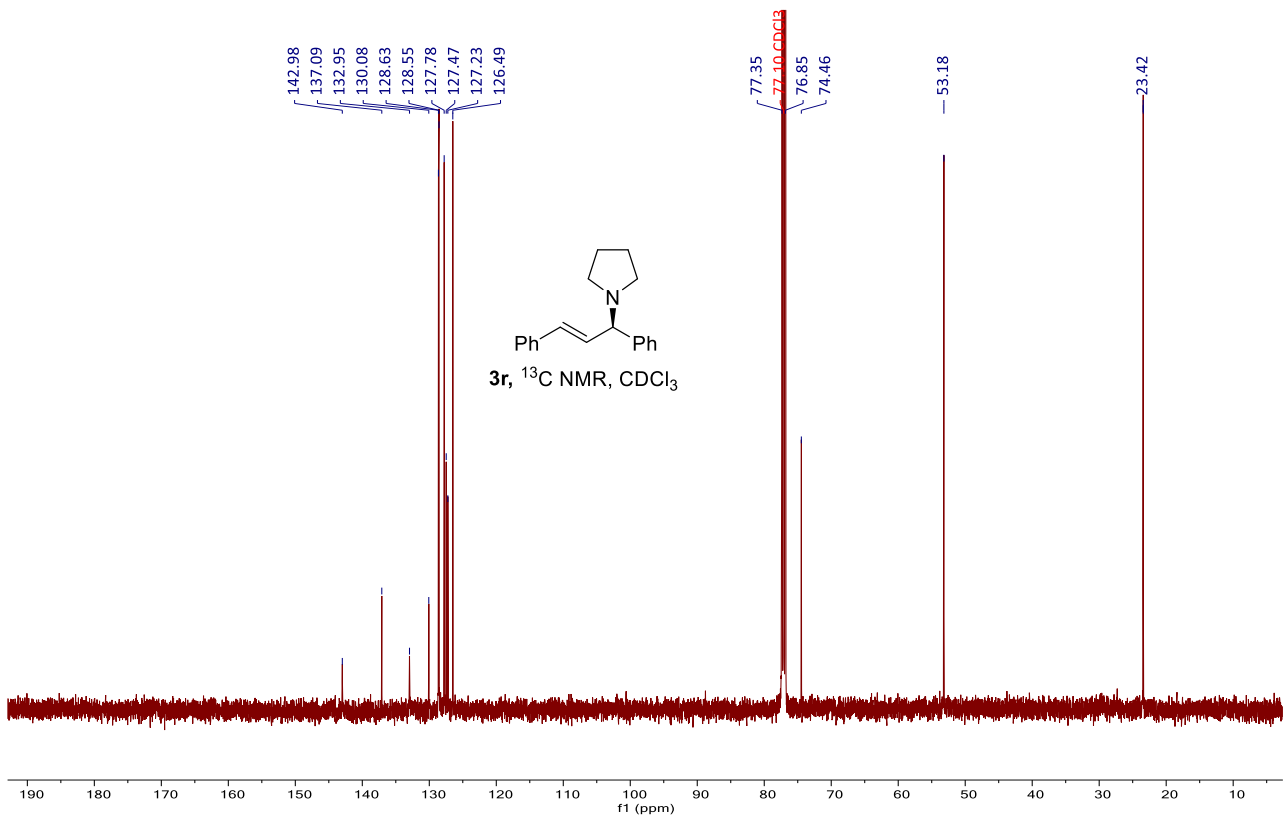



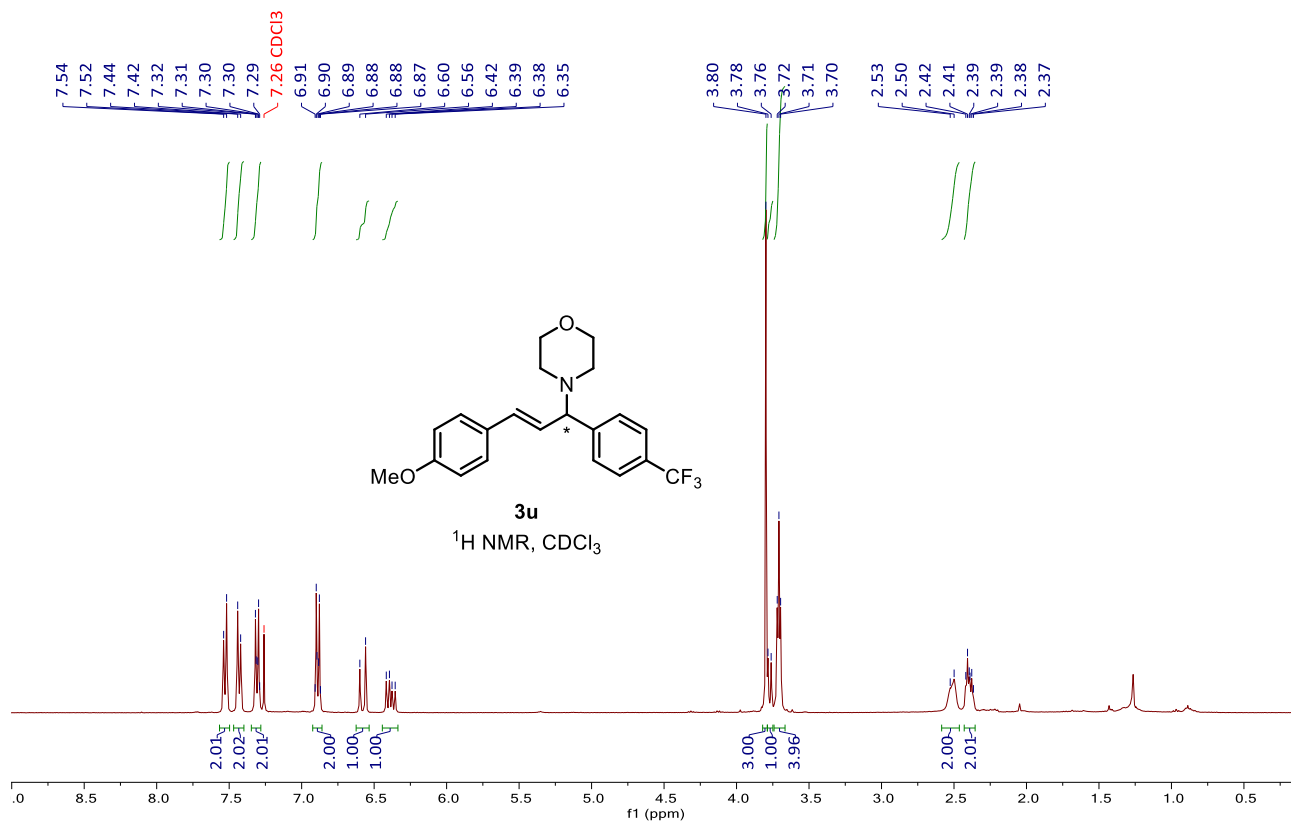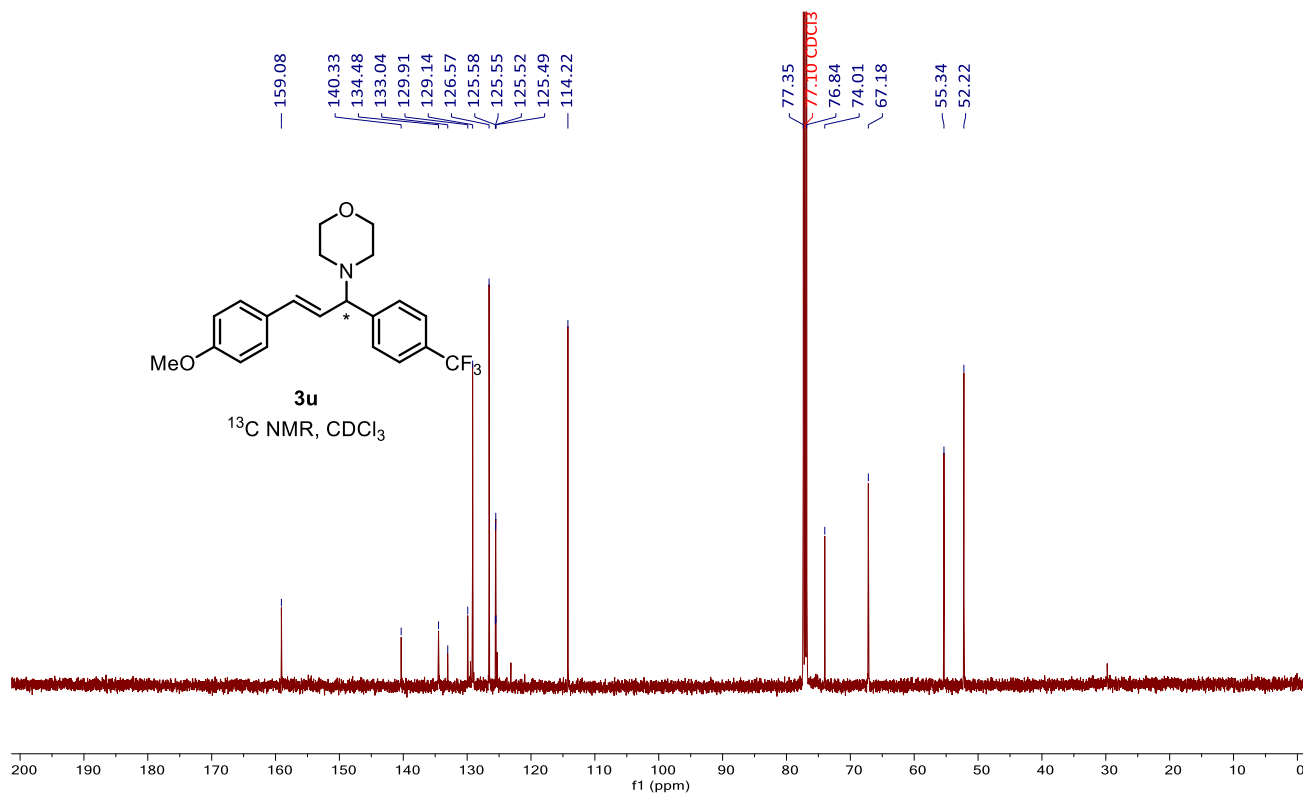

-62.59

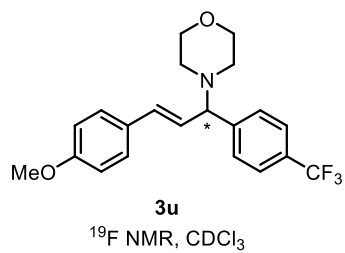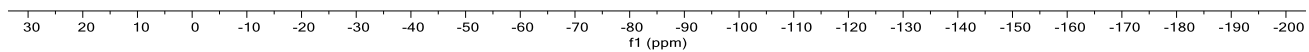

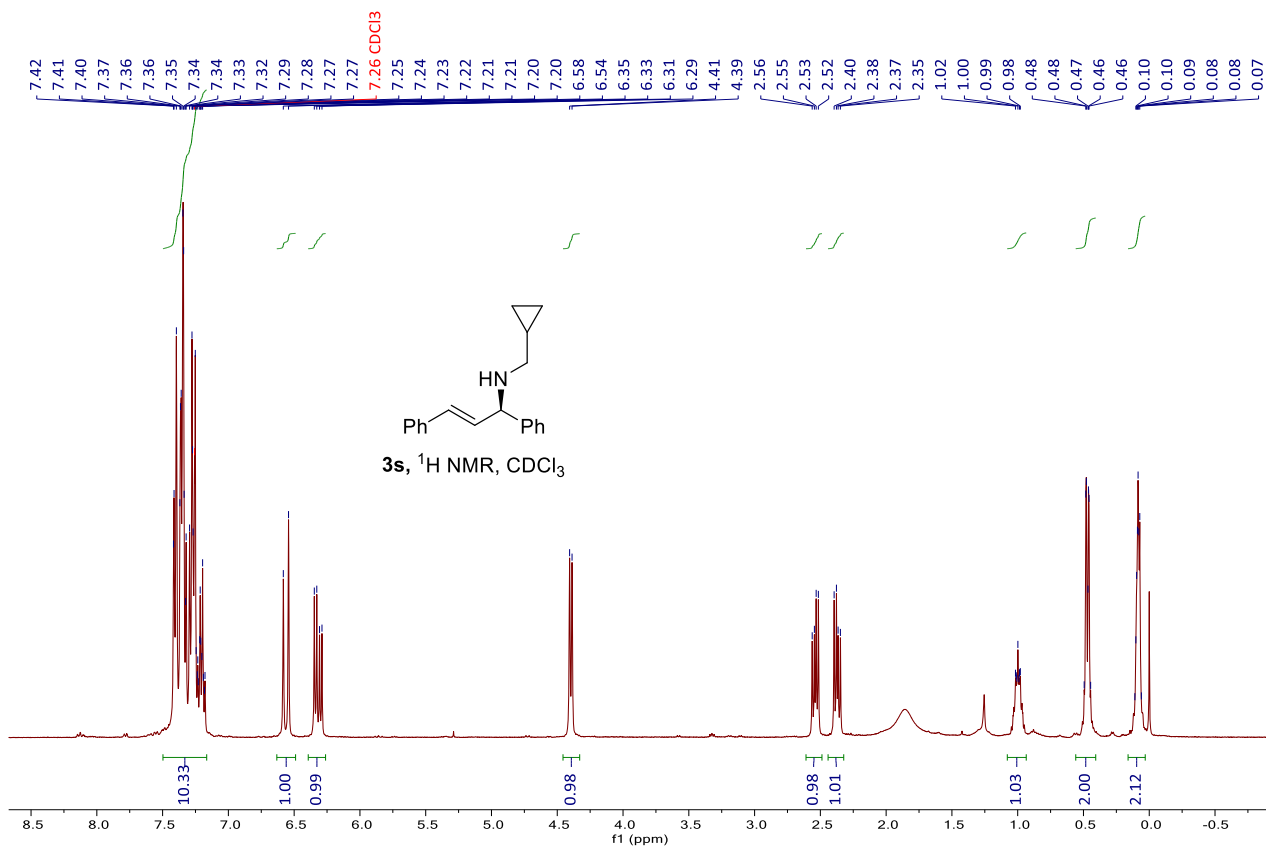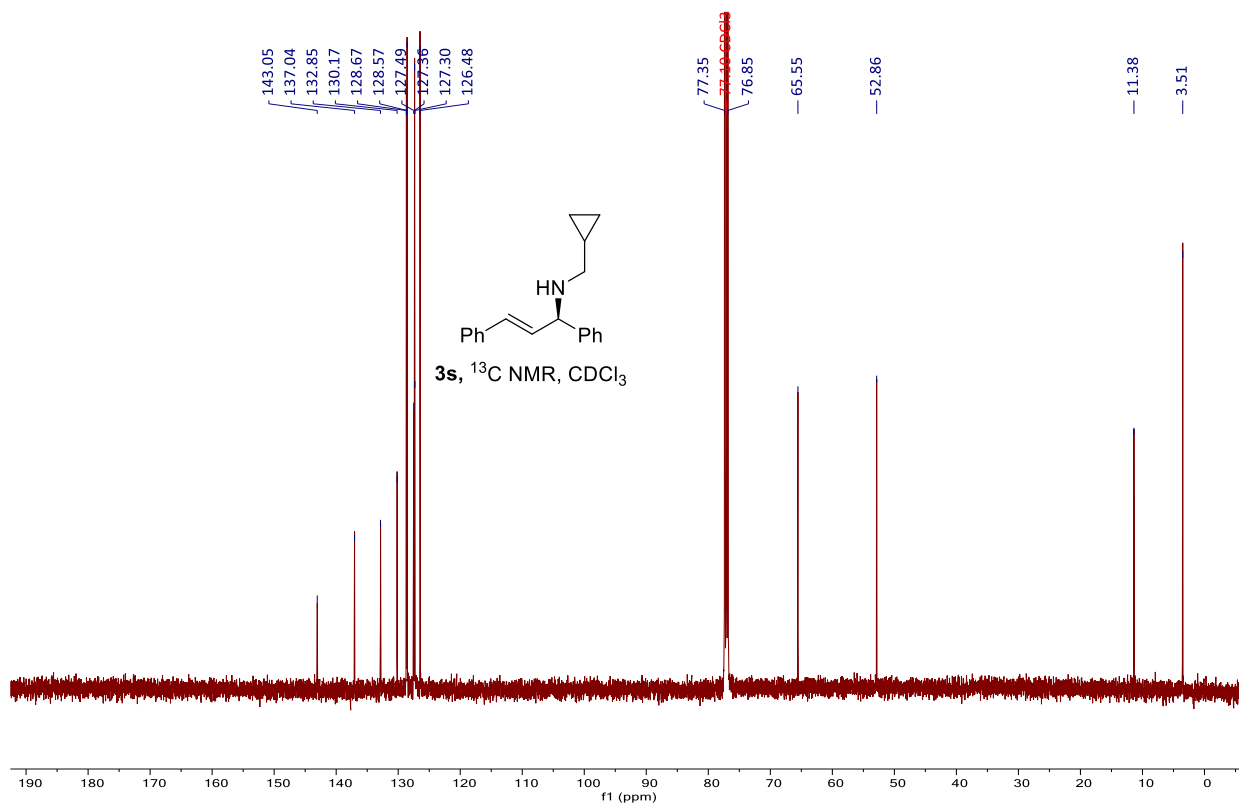

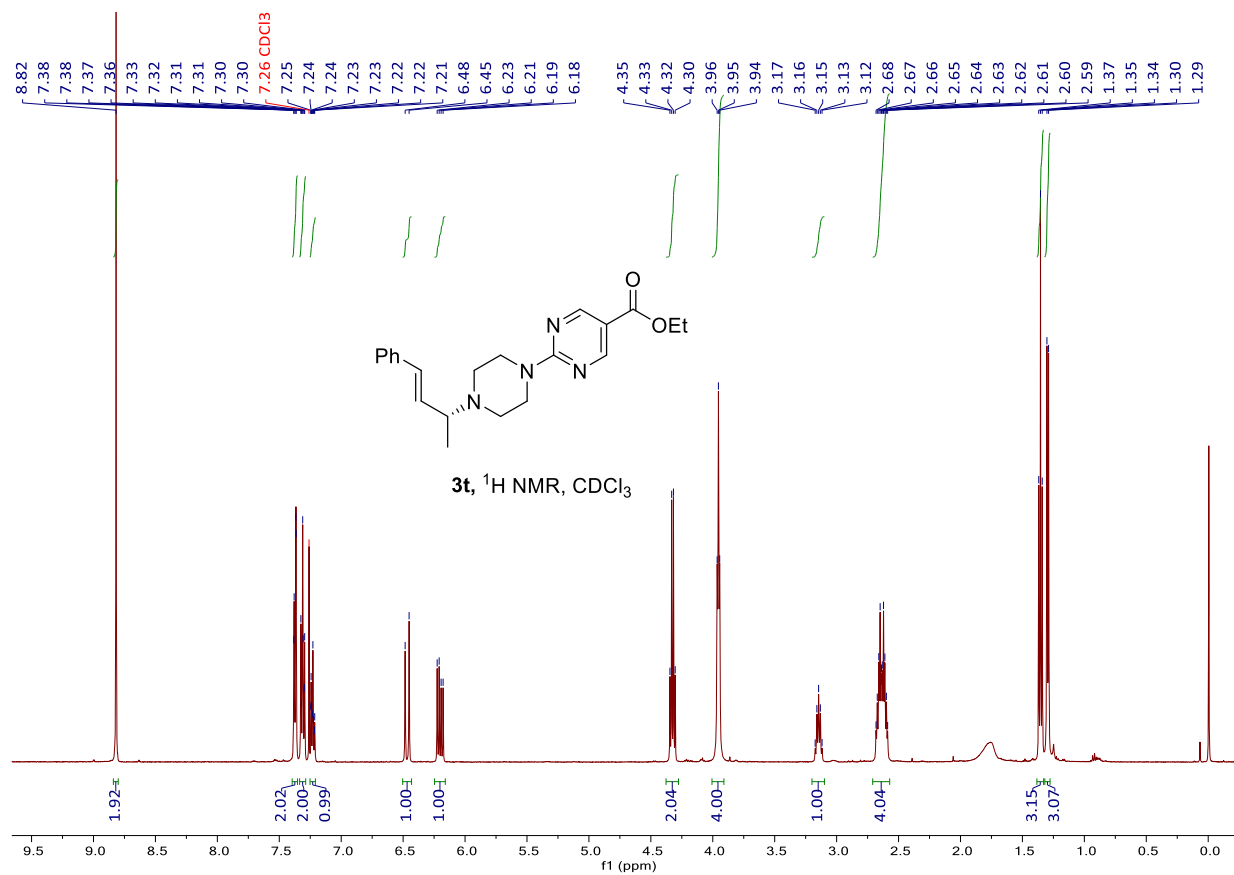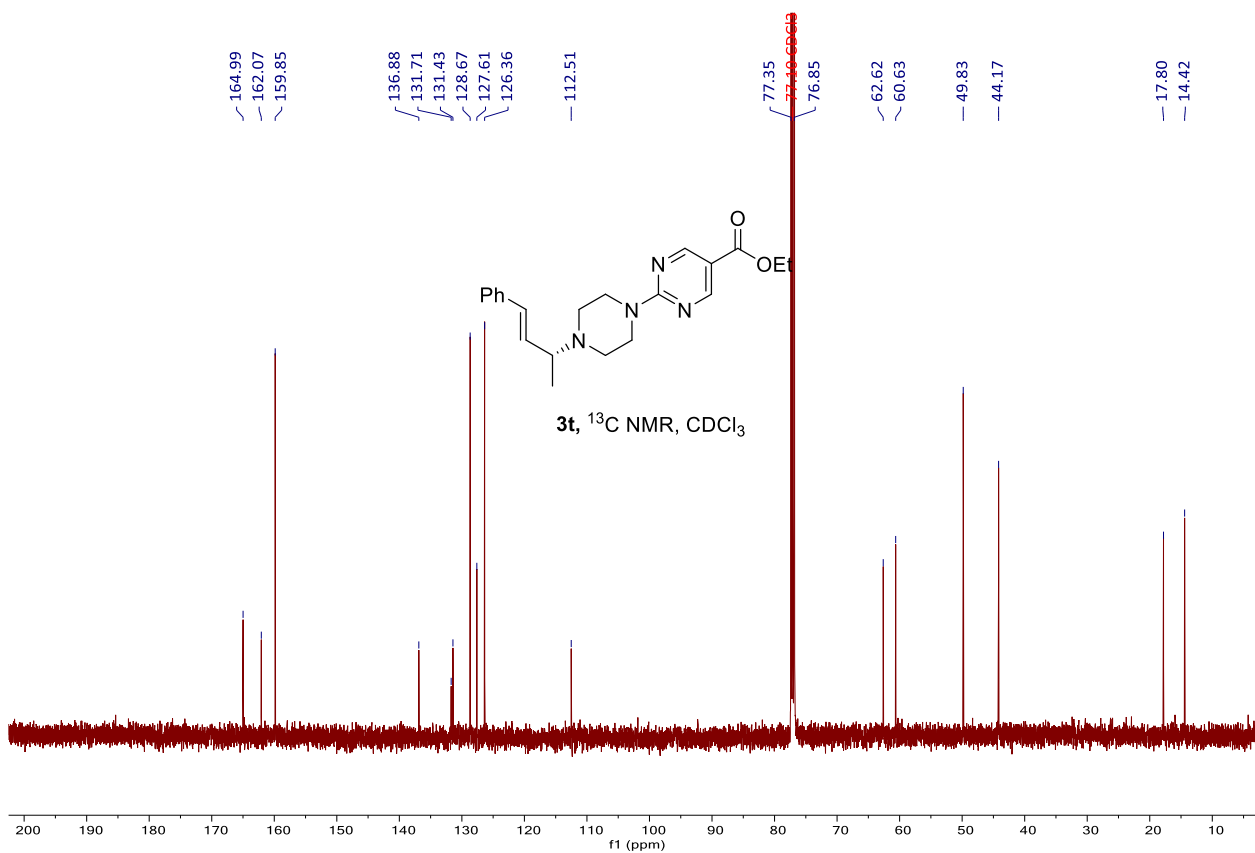

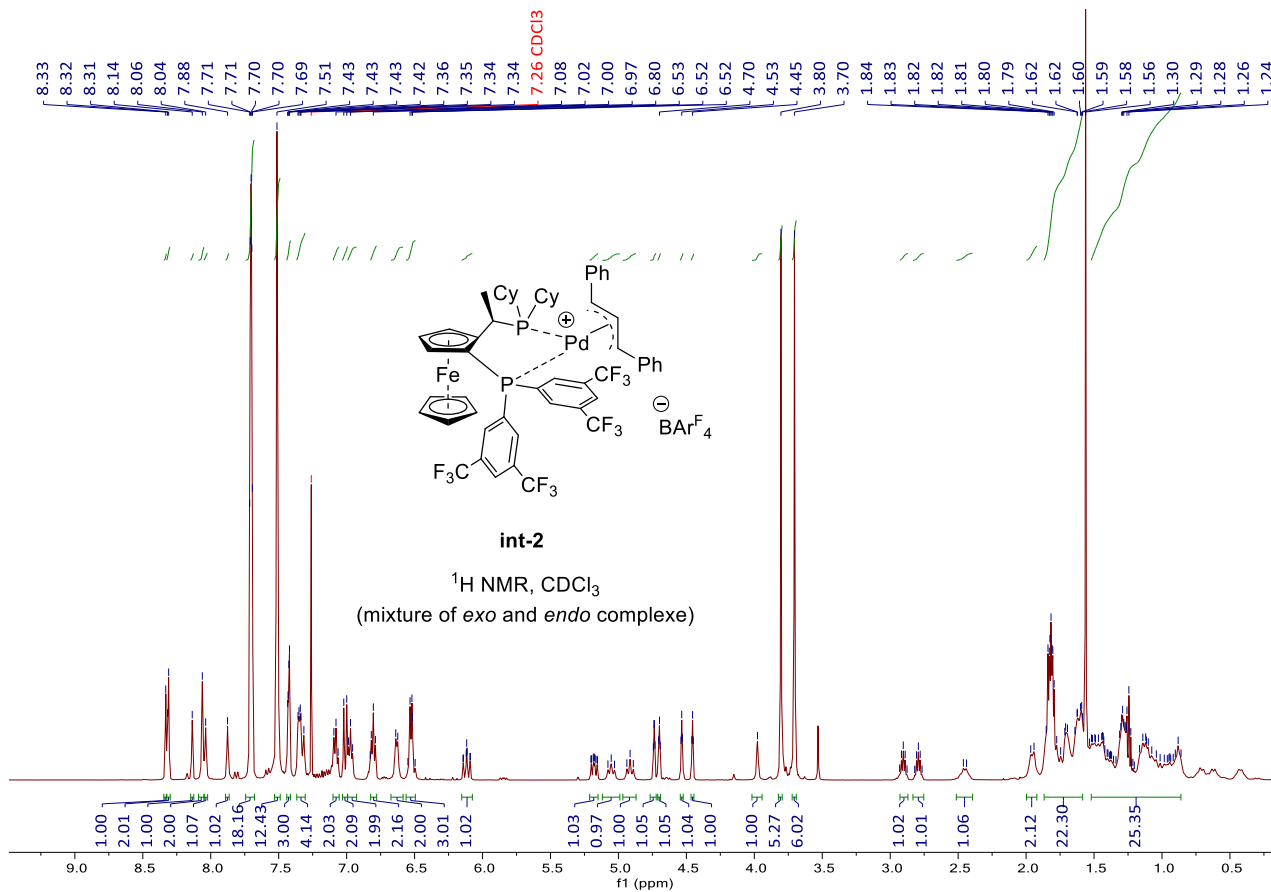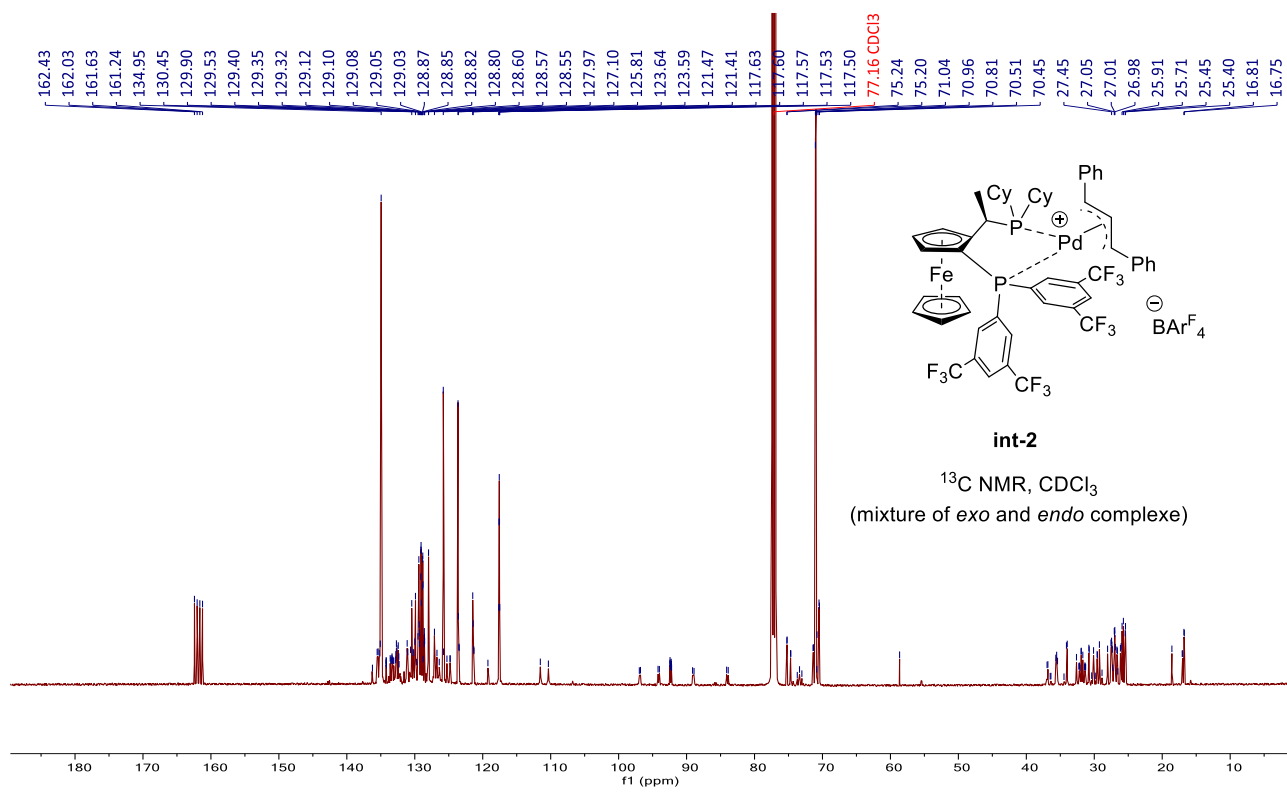

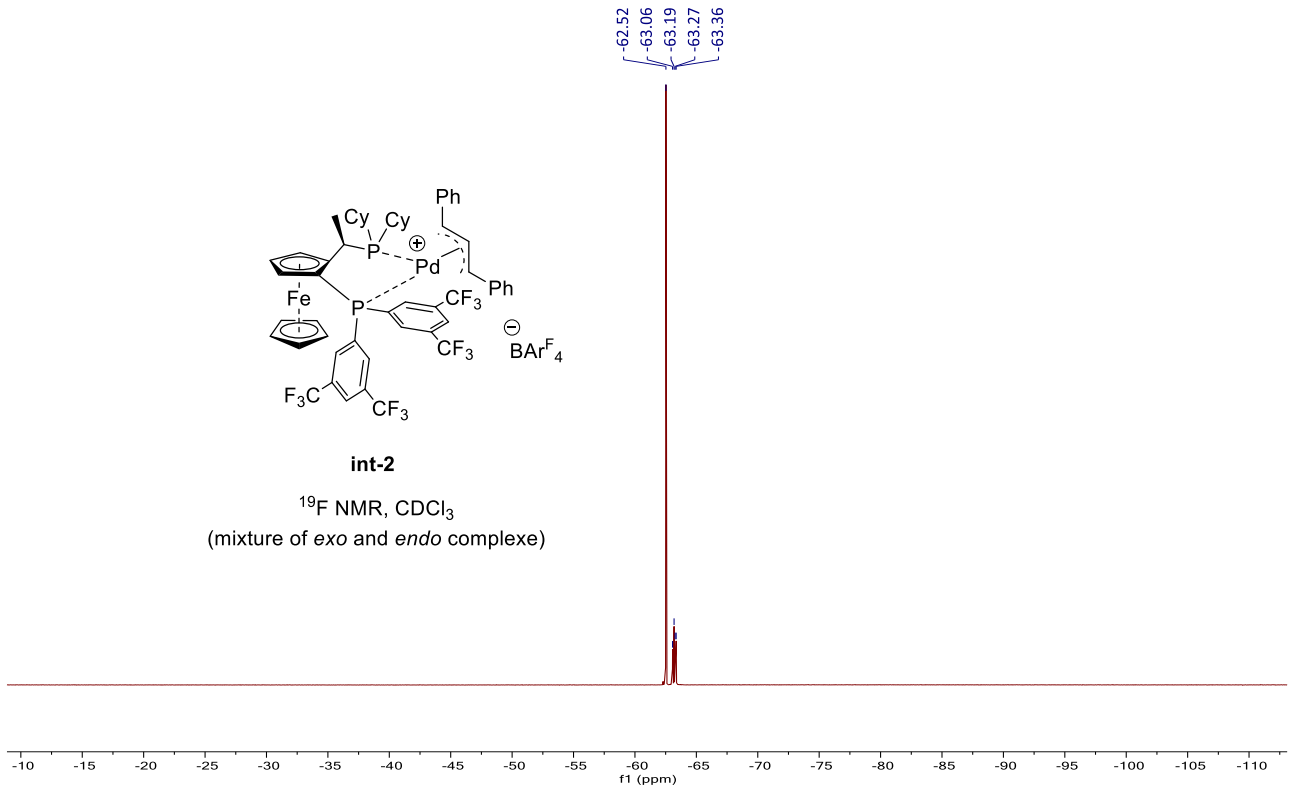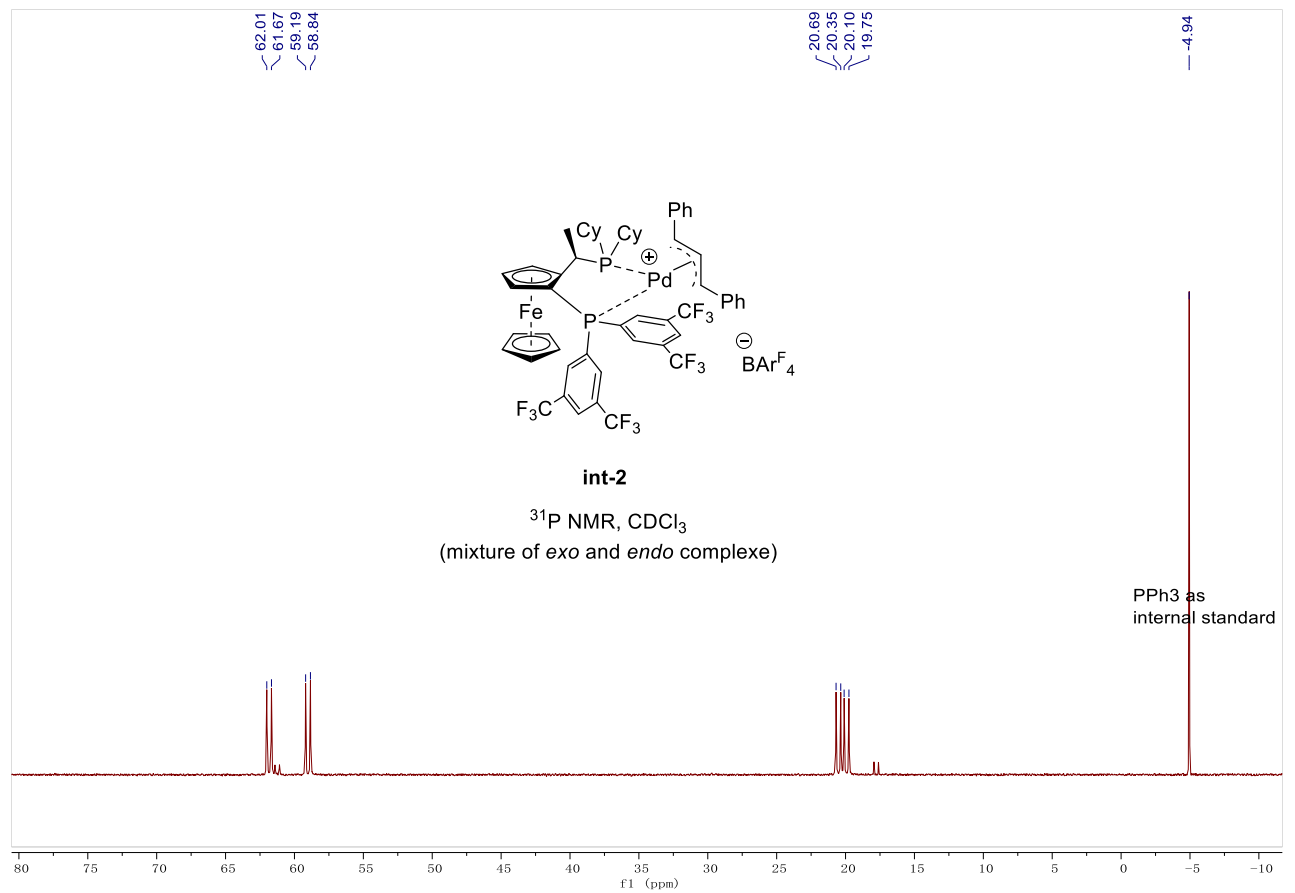

## 8. References

1. Hussain, M. M. & Walsh, P. J. Allylic substitution versus Suzuki cross-coupling: capitalizing on chemoselectivity with bifunctional substrates. *Angew. Chem. Int. Ed.* **49**, 1834–1837 (2010).
2. Liu, J., Wang, L., Zheng, X., Wang, A. L., Zhu, M., Yu, J. & Shen, Q. Yb(OTf)<sub>3</sub>-promoted effective benzylation and allylation with *N*-tosyl amino group as a stable leaving group. *Tetrahedron Lett.* **53**, 1843–1846 (2012).
3. Xiao, X., Huang, S., Tang, S., Jia, G., Ou, G. & Li, Y. Ligand-free, quinoline *N*-assisted copper-catalyzed nitrene transfer reaction to synthesize 8-quinolylsulfimides. *J. Org. Chem.* **84**, 7618–7629 (2019).
4. Sato, Y., Yoshino, T. & Mori, M. Pd-catalyzed allylic substitution using nucleophilic *N*-heterocyclic carbene as a ligand. *Org. Lett.* **5**, 31–33 (2003).
5. Cheng, H.-G., Feng, B., Chen, L.-Y., Guo, W., Yu, X.-Y., Lu, L.-Q., Chen, J.-R. & Xiao, W.-J. Rational design of sulfoxide–phosphine ligands for Pd-catalyzed enantioselective allylic alkylation reactions. *Chem. Commun.* **50**, 2873–2875 (2014).
6. Manabe, K. & Kobayashi, S. Palladium-catalyzed, carboxylic acid-assisted allylic substitution of carbon nucleophiles with allyl alcohols as allylating agents in water. *Org. Lett.* **5**, 3241–3244 (2003).
7. Danjo, H., Tanaka, D., Hayashi, T. & Uozumi, Y. Allylic substitution in water catalyzed by amphiphilic resin-supported palladium-phosphine complexes. *Tetrahedron* **55**, 14341–14352 (1999).
8. Faller, J. W. & Wilt, J. C. Palladium/BINAP(S)-catalyzed asymmetric allylic amination. *Org. Lett.* **7**, 633–636 (2005).
9. Feng, B., Cheng, H.-G., Chen, J.-R., Deng, Q.-H., Lu, L.-Q. & Xiao, W.-J. Palladium/sulfoxide–phosphine-catalyzed highly enantioselective allylic etherification and amination. *Chem. Commun.* **50**, 9550–9553 (2014).
10. Zhao, Q.; Zhuo, C.-X.; You, S.-L. Enantioselective synthesis of *N*-allylindoles *via* palladium-catalyzed allylic amination/oxidation of indolines. *RSC Adv.* **4**, 10875–10878 (2014).

11. Park, S. & Malcolmson, S. J. Development and mechanistic investigations of enantioselective Pd-Catalyzed intermolecular hydroaminations of internal dienes. *ACS Catal.* **8**, 8468–8476 (2018).
12. Wu, H., Xie, F., Wang, Y., Zhao, X., Liu, D. & Zhang, W. Pd-catalyzed asymmetric allylic amination using easily accessible metallocenyl P,N-ligands. *Org. Biomol. Chem.* **13**, 4248–4254 (2015).
13. Adamson, N. J., Wilbur, K. C. E. & Malcolmson, S. J. Enantioselective intermolecular Pd-catalyzed hydroalkylation of acyclic 1,3-dienes with activated pronucleophiles. *J. Am. Chem. Soc.* **140**, 2761–2764 (2018).
14. Behenna, D. C., Mohr, J. T., Sherden, N. H., Marinescu, S. C., Harned, A. M., Tani, K., Seto, M., Ma, S., Novák, Z., Krout, M. R., McFadden, R. M., Roizen, J. L., Enquist, J. A., White, D. E., Levine, S. R., Petrova, K. V., Iwashita, A., Virgil, S. C. & Stoltz, B. M. Enantioselective decarboxylative alkylation reactions: catalyst development, substrate scope, and mechanistic studies. *Chem. – Eur. J.* **17**, 14199–14223 (2011).
